# Supplementary material for: Changes in Rocky Intertidal Community Structure During a Marine Heatwave in the Northern Gulf of Alaska
Source: Frontiers journal article supplement (doi:10.3389/fmars.2021.556820), 2021-02-17
Supplement: Data_Sheet_1.XLSX [file Data_Sheet_1.XLSX]

## Sheet: METAinfo
These data were calculated from 2 base datasets, compiled from annually, and available through [https://portal.aoos.org/gulf-of-alaska] under Gulf Watch Alaska - Nearshore:
Ecological trends in Kachemak Bay - Rocky intertidal community data
Intertidal Systems in Gulf of Alaska - Rocky intertidal percent cover data
These data have all be combined and summarized for comparability between the 2 base datasets. This file contains data used for analyses in the Weitzman et al. manuscript.
Field	Description
sampleID	Unique ID field for each record
taxa	taxonomic classes used for analysis
cover	Percent cover of sessile organisms
pmh	period: Before or During the Pacific Marine Heatwave
year	Year of sampling 2012-2019
region	Region sampled: Katmai, Kachemak Bay, Kenai Fjords, or Prince William Sound
site	Site name designating the specific sampling location
strata	tidal stratum or elevation: Mid (1.5 MLLW) and Low (0.5 MLLW)
rep	replicate or quadrat sampled

## Sheet: DATA
sampleID	taxa	cover	pmh	year	region	site	strata	rep
Pre_2012_Kachemak Bay_Bishop's Beach_L_1	Acrosiphonia	10	Before	2012	Kachemak Bay	Bishop's Beach	Low	1
Pre_2012_Kachemak Bay_Bishop's Beach_L_1	Alaria	0	Before	2012	Kachemak Bay	Bishop's Beach	Low	1
Pre_2012_Kachemak Bay_Bishop's Beach_L_1	bare substrate	55	Before	2012	Kachemak Bay	Bishop's Beach	Low	1
Pre_2012_Kachemak Bay_Bishop's Beach_L_1	barnacles	0	Before	2012	Kachemak Bay	Bishop's Beach	Low	1
Pre_2012_Kachemak Bay_Bishop's Beach_L_1	Boreophyllum / Pyropia / Wildemania	0	Before	2012	Kachemak Bay	Bishop's Beach	Low	1
Pre_2012_Kachemak Bay_Bishop's Beach_L_1	Cladophora / Chaetomorpha	0	Before	2012	Kachemak Bay	Bishop's Beach	Low	1
Pre_2012_Kachemak Bay_Bishop's Beach_L_1	Cryptosiphonia	0	Before	2012	Kachemak Bay	Bishop's Beach	Low	1
Pre_2012_Kachemak Bay_Bishop's Beach_L_1	Devaleraea / Palmaria	5	Before	2012	Kachemak Bay	Bishop's Beach	Low	1
Pre_2012_Kachemak Bay_Bishop's Beach_L_1	encrusting coralline algae	0	Before	2012	Kachemak Bay	Bishop's Beach	Low	1
Pre_2012_Kachemak Bay_Bishop's Beach_L_1	Fucus	10	Before	2012	Kachemak Bay	Bishop's Beach	Low	1
Pre_2012_Kachemak Bay_Bishop's Beach_L_1	Gloiopeltis	0	Before	2012	Kachemak Bay	Bishop's Beach	Low	1
Pre_2012_Kachemak Bay_Bishop's Beach_L_1	Halosaccion	0	Before	2012	Kachemak Bay	Bishop's Beach	Low	1
Pre_2012_Kachemak Bay_Bishop's Beach_L_1	Mastocarpus / Mazaella	0	Before	2012	Kachemak Bay	Bishop's Beach	Low	1
Pre_2012_Kachemak Bay_Bishop's Beach_L_1	Mytilus	0	Before	2012	Kachemak Bay	Bishop's Beach	Low	1
Pre_2012_Kachemak Bay_Bishop's Beach_L_1	non-coralline algal crust	0	Before	2012	Kachemak Bay	Bishop's Beach	Low	1
Pre_2012_Kachemak Bay_Bishop's Beach_L_1	Odonthalia / Neorhodomela	0	Before	2012	Kachemak Bay	Bishop's Beach	Low	1
Pre_2012_Kachemak Bay_Bishop's Beach_L_1	Savoiea / Polysiphonia	5	Before	2012	Kachemak Bay	Bishop's Beach	Low	1
Pre_2012_Kachemak Bay_Bishop's Beach_L_1	Ulva / Monostroma	0	Before	2012	Kachemak Bay	Bishop's Beach	Low	1
Pre_2012_Kachemak Bay_Bishop's Beach_L_2	Acrosiphonia	0	Before	2012	Kachemak Bay	Bishop's Beach	Low	2
Pre_2012_Kachemak Bay_Bishop's Beach_L_2	Alaria	10	Before	2012	Kachemak Bay	Bishop's Beach	Low	2
Pre_2012_Kachemak Bay_Bishop's Beach_L_2	bare substrate	9.09091	Before	2012	Kachemak Bay	Bishop's Beach	Low	2
Pre_2012_Kachemak Bay_Bishop's Beach_L_2	barnacles	0	Before	2012	Kachemak Bay	Bishop's Beach	Low	2
Pre_2012_Kachemak Bay_Bishop's Beach_L_2	Boreophyllum / Pyropia / Wildemania	0	Before	2012	Kachemak Bay	Bishop's Beach	Low	2
Pre_2012_Kachemak Bay_Bishop's Beach_L_2	Cladophora / Chaetomorpha	0	Before	2012	Kachemak Bay	Bishop's Beach	Low	2
Pre_2012_Kachemak Bay_Bishop's Beach_L_2	Cryptosiphonia	0	Before	2012	Kachemak Bay	Bishop's Beach	Low	2
Pre_2012_Kachemak Bay_Bishop's Beach_L_2	Devaleraea / Palmaria	9.09091	Before	2012	Kachemak Bay	Bishop's Beach	Low	2
Pre_2012_Kachemak Bay_Bishop's Beach_L_2	encrusting coralline algae	9.09091	Before	2012	Kachemak Bay	Bishop's Beach	Low	2
Pre_2012_Kachemak Bay_Bishop's Beach_L_2	Fucus	4.54545	Before	2012	Kachemak Bay	Bishop's Beach	Low	2
Pre_2012_Kachemak Bay_Bishop's Beach_L_2	Gloiopeltis	0	Before	2012	Kachemak Bay	Bishop's Beach	Low	2
Pre_2012_Kachemak Bay_Bishop's Beach_L_2	Halosaccion	0	Before	2012	Kachemak Bay	Bishop's Beach	Low	2
Pre_2012_Kachemak Bay_Bishop's Beach_L_2	Mastocarpus / Mazaella	0	Before	2012	Kachemak Bay	Bishop's Beach	Low	2
Pre_2012_Kachemak Bay_Bishop's Beach_L_2	Mytilus	0	Before	2012	Kachemak Bay	Bishop's Beach	Low	2
Pre_2012_Kachemak Bay_Bishop's Beach_L_2	non-coralline algal crust	0	Before	2012	Kachemak Bay	Bishop's Beach	Low	2
Pre_2012_Kachemak Bay_Bishop's Beach_L_2	Odonthalia / Neorhodomela	0	Before	2012	Kachemak Bay	Bishop's Beach	Low	2
Pre_2012_Kachemak Bay_Bishop's Beach_L_2	Savoiea / Polysiphonia	0	Before	2012	Kachemak Bay	Bishop's Beach	Low	2
Pre_2012_Kachemak Bay_Bishop's Beach_L_2	Ulva / Monostroma	0	Before	2012	Kachemak Bay	Bishop's Beach	Low	2
Pre_2012_Kachemak Bay_Bishop's Beach_L_3	Acrosiphonia	3.84615	Before	2012	Kachemak Bay	Bishop's Beach	Low	3
Pre_2012_Kachemak Bay_Bishop's Beach_L_3	Alaria	0	Before	2012	Kachemak Bay	Bishop's Beach	Low	3
Pre_2012_Kachemak Bay_Bishop's Beach_L_3	bare substrate	15.3846	Before	2012	Kachemak Bay	Bishop's Beach	Low	3
Pre_2012_Kachemak Bay_Bishop's Beach_L_3	barnacles	0	Before	2012	Kachemak Bay	Bishop's Beach	Low	3
Pre_2012_Kachemak Bay_Bishop's Beach_L_3	Boreophyllum / Pyropia / Wildemania	0	Before	2012	Kachemak Bay	Bishop's Beach	Low	3
Pre_2012_Kachemak Bay_Bishop's Beach_L_3	Cladophora / Chaetomorpha	0	Before	2012	Kachemak Bay	Bishop's Beach	Low	3
Pre_2012_Kachemak Bay_Bishop's Beach_L_3	Cryptosiphonia	0	Before	2012	Kachemak Bay	Bishop's Beach	Low	3
Pre_2012_Kachemak Bay_Bishop's Beach_L_3	Devaleraea / Palmaria	15.3846	Before	2012	Kachemak Bay	Bishop's Beach	Low	3
Pre_2012_Kachemak Bay_Bishop's Beach_L_3	encrusting coralline algae	7.69231	Before	2012	Kachemak Bay	Bishop's Beach	Low	3
Pre_2012_Kachemak Bay_Bishop's Beach_L_3	Fucus	0	Before	2012	Kachemak Bay	Bishop's Beach	Low	3
Pre_2012_Kachemak Bay_Bishop's Beach_L_3	Gloiopeltis	0	Before	2012	Kachemak Bay	Bishop's Beach	Low	3
Pre_2012_Kachemak Bay_Bishop's Beach_L_3	Halosaccion	0	Before	2012	Kachemak Bay	Bishop's Beach	Low	3
Pre_2012_Kachemak Bay_Bishop's Beach_L_3	Mastocarpus / Mazaella	0	Before	2012	Kachemak Bay	Bishop's Beach	Low	3
Pre_2012_Kachemak Bay_Bishop's Beach_L_3	Mytilus	0	Before	2012	Kachemak Bay	Bishop's Beach	Low	3
Pre_2012_Kachemak Bay_Bishop's Beach_L_3	non-coralline algal crust	0	Before	2012	Kachemak Bay	Bishop's Beach	Low	3
Pre_2012_Kachemak Bay_Bishop's Beach_L_3	Odonthalia / Neorhodomela	0	Before	2012	Kachemak Bay	Bishop's Beach	Low	3
Pre_2012_Kachemak Bay_Bishop's Beach_L_3	Savoiea / Polysiphonia	0	Before	2012	Kachemak Bay	Bishop's Beach	Low	3
Pre_2012_Kachemak Bay_Bishop's Beach_L_3	Ulva / Monostroma	0	Before	2012	Kachemak Bay	Bishop's Beach	Low	3
Pre_2012_Kachemak Bay_Bishop's Beach_L_4	Acrosiphonia	0	Before	2012	Kachemak Bay	Bishop's Beach	Low	4
Pre_2012_Kachemak Bay_Bishop's Beach_L_4	Alaria	3.7037	Before	2012	Kachemak Bay	Bishop's Beach	Low	4
Pre_2012_Kachemak Bay_Bishop's Beach_L_4	bare substrate	14.8148	Before	2012	Kachemak Bay	Bishop's Beach	Low	4
Pre_2012_Kachemak Bay_Bishop's Beach_L_4	barnacles	0	Before	2012	Kachemak Bay	Bishop's Beach	Low	4
Pre_2012_Kachemak Bay_Bishop's Beach_L_4	Boreophyllum / Pyropia / Wildemania	0	Before	2012	Kachemak Bay	Bishop's Beach	Low	4
Pre_2012_Kachemak Bay_Bishop's Beach_L_4	Cladophora / Chaetomorpha	0	Before	2012	Kachemak Bay	Bishop's Beach	Low	4
Pre_2012_Kachemak Bay_Bishop's Beach_L_4	Cryptosiphonia	0	Before	2012	Kachemak Bay	Bishop's Beach	Low	4
Pre_2012_Kachemak Bay_Bishop's Beach_L_4	Devaleraea / Palmaria	0	Before	2012	Kachemak Bay	Bishop's Beach	Low	4
Pre_2012_Kachemak Bay_Bishop's Beach_L_4	encrusting coralline algae	22.2222	Before	2012	Kachemak Bay	Bishop's Beach	Low	4
Pre_2012_Kachemak Bay_Bishop's Beach_L_4	Fucus	0	Before	2012	Kachemak Bay	Bishop's Beach	Low	4
Pre_2012_Kachemak Bay_Bishop's Beach_L_4	Gloiopeltis	0	Before	2012	Kachemak Bay	Bishop's Beach	Low	4
Pre_2012_Kachemak Bay_Bishop's Beach_L_4	Halosaccion	0	Before	2012	Kachemak Bay	Bishop's Beach	Low	4
Pre_2012_Kachemak Bay_Bishop's Beach_L_4	Mastocarpus / Mazaella	0	Before	2012	Kachemak Bay	Bishop's Beach	Low	4
Pre_2012_Kachemak Bay_Bishop's Beach_L_4	Mytilus	0	Before	2012	Kachemak Bay	Bishop's Beach	Low	4
Pre_2012_Kachemak Bay_Bishop's Beach_L_4	non-coralline algal crust	0	Before	2012	Kachemak Bay	Bishop's Beach	Low	4
Pre_2012_Kachemak Bay_Bishop's Beach_L_4	Odonthalia / Neorhodomela	0	Before	2012	Kachemak Bay	Bishop's Beach	Low	4
Pre_2012_Kachemak Bay_Bishop's Beach_L_4	Savoiea / Polysiphonia	0	Before	2012	Kachemak Bay	Bishop's Beach	Low	4
Pre_2012_Kachemak Bay_Bishop's Beach_L_4	Ulva / Monostroma	0	Before	2012	Kachemak Bay	Bishop's Beach	Low	4
Pre_2012_Kachemak Bay_Bishop's Beach_L_5	Acrosiphonia	0	Before	2012	Kachemak Bay	Bishop's Beach	Low	5
Pre_2012_Kachemak Bay_Bishop's Beach_L_5	Alaria	0	Before	2012	Kachemak Bay	Bishop's Beach	Low	5
Pre_2012_Kachemak Bay_Bishop's Beach_L_5	bare substrate	1.76263	Before	2012	Kachemak Bay	Bishop's Beach	Low	5
Pre_2012_Kachemak Bay_Bishop's Beach_L_5	barnacles	0	Before	2012	Kachemak Bay	Bishop's Beach	Low	5
Pre_2012_Kachemak Bay_Bishop's Beach_L_5	Boreophyllum / Pyropia / Wildemania	0	Before	2012	Kachemak Bay	Bishop's Beach	Low	5
Pre_2012_Kachemak Bay_Bishop's Beach_L_5	Cladophora / Chaetomorpha	0	Before	2012	Kachemak Bay	Bishop's Beach	Low	5
Pre_2012_Kachemak Bay_Bishop's Beach_L_5	Cryptosiphonia	0	Before	2012	Kachemak Bay	Bishop's Beach	Low	5
Pre_2012_Kachemak Bay_Bishop's Beach_L_5	Devaleraea / Palmaria	0	Before	2012	Kachemak Bay	Bishop's Beach	Low	5
Pre_2012_Kachemak Bay_Bishop's Beach_L_5	encrusting coralline algae	29.3772	Before	2012	Kachemak Bay	Bishop's Beach	Low	5
Pre_2012_Kachemak Bay_Bishop's Beach_L_5	Fucus	0	Before	2012	Kachemak Bay	Bishop's Beach	Low	5
Pre_2012_Kachemak Bay_Bishop's Beach_L_5	Gloiopeltis	0	Before	2012	Kachemak Bay	Bishop's Beach	Low	5
Pre_2012_Kachemak Bay_Bishop's Beach_L_5	Halosaccion	0	Before	2012	Kachemak Bay	Bishop's Beach	Low	5
Pre_2012_Kachemak Bay_Bishop's Beach_L_5	Mastocarpus / Mazaella	0	Before	2012	Kachemak Bay	Bishop's Beach	Low	5
Pre_2012_Kachemak Bay_Bishop's Beach_L_5	Mytilus	0	Before	2012	Kachemak Bay	Bishop's Beach	Low	5
Pre_2012_Kachemak Bay_Bishop's Beach_L_5	non-coralline algal crust	0	Before	2012	Kachemak Bay	Bishop's Beach	Low	5
Pre_2012_Kachemak Bay_Bishop's Beach_L_5	Odonthalia / Neorhodomela	0	Before	2012	Kachemak Bay	Bishop's Beach	Low	5
Pre_2012_Kachemak Bay_Bishop's Beach_L_5	Savoiea / Polysiphonia	0	Before	2012	Kachemak Bay	Bishop's Beach	Low	5
Pre_2012_Kachemak Bay_Bishop's Beach_L_5	Ulva / Monostroma	1.17509	Before	2012	Kachemak Bay	Bishop's Beach	Low	5
Pre_2012_Kachemak Bay_Bishop's Beach_L_6	Acrosiphonia	0	Before	2012	Kachemak Bay	Bishop's Beach	Low	6
Pre_2012_Kachemak Bay_Bishop's Beach_L_6	Alaria	0	Before	2012	Kachemak Bay	Bishop's Beach	Low	6
Pre_2012_Kachemak Bay_Bishop's Beach_L_6	bare substrate	38	Before	2012	Kachemak Bay	Bishop's Beach	Low	6
Pre_2012_Kachemak Bay_Bishop's Beach_L_6	barnacles	0	Before	2012	Kachemak Bay	Bishop's Beach	Low	6
Pre_2012_Kachemak Bay_Bishop's Beach_L_6	Boreophyllum / Pyropia / Wildemania	0	Before	2012	Kachemak Bay	Bishop's Beach	Low	6
Pre_2012_Kachemak Bay_Bishop's Beach_L_6	Cladophora / Chaetomorpha	0	Before	2012	Kachemak Bay	Bishop's Beach	Low	6
Pre_2012_Kachemak Bay_Bishop's Beach_L_6	Cryptosiphonia	0	Before	2012	Kachemak Bay	Bishop's Beach	Low	6
Pre_2012_Kachemak Bay_Bishop's Beach_L_6	Devaleraea / Palmaria	0	Before	2012	Kachemak Bay	Bishop's Beach	Low	6
Pre_2012_Kachemak Bay_Bishop's Beach_L_6	encrusting coralline algae	6.66667	Before	2012	Kachemak Bay	Bishop's Beach	Low	6
Pre_2012_Kachemak Bay_Bishop's Beach_L_6	Fucus	3.33333	Before	2012	Kachemak Bay	Bishop's Beach	Low	6
Pre_2012_Kachemak Bay_Bishop's Beach_L_6	Gloiopeltis	0	Before	2012	Kachemak Bay	Bishop's Beach	Low	6
Pre_2012_Kachemak Bay_Bishop's Beach_L_6	Halosaccion	0	Before	2012	Kachemak Bay	Bishop's Beach	Low	6
Pre_2012_Kachemak Bay_Bishop's Beach_L_6	Mastocarpus / Mazaella	0	Before	2012	Kachemak Bay	Bishop's Beach	Low	6
Pre_2012_Kachemak Bay_Bishop's Beach_L_6	Mytilus	0	Before	2012	Kachemak Bay	Bishop's Beach	Low	6
Pre_2012_Kachemak Bay_Bishop's Beach_L_6	non-coralline algal crust	0	Before	2012	Kachemak Bay	Bishop's Beach	Low	6
Pre_2012_Kachemak Bay_Bishop's Beach_L_6	Odonthalia / Neorhodomela	0	Before	2012	Kachemak Bay	Bishop's Beach	Low	6
Pre_2012_Kachemak Bay_Bishop's Beach_L_6	Savoiea / Polysiphonia	0	Before	2012	Kachemak Bay	Bishop's Beach	Low	6
Pre_2012_Kachemak Bay_Bishop's Beach_L_6	Ulva / Monostroma	0	Before	2012	Kachemak Bay	Bishop's Beach	Low	6
Pre_2012_Kachemak Bay_Bishop's Beach_L_7	Acrosiphonia	6.66667	Before	2012	Kachemak Bay	Bishop's Beach	Low	7
Pre_2012_Kachemak Bay_Bishop's Beach_L_7	Alaria	7.33333	Before	2012	Kachemak Bay	Bishop's Beach	Low	7
Pre_2012_Kachemak Bay_Bishop's Beach_L_7	bare substrate	20	Before	2012	Kachemak Bay	Bishop's Beach	Low	7
Pre_2012_Kachemak Bay_Bishop's Beach_L_7	barnacles	0	Before	2012	Kachemak Bay	Bishop's Beach	Low	7
Pre_2012_Kachemak Bay_Bishop's Beach_L_7	Boreophyllum / Pyropia / Wildemania	0	Before	2012	Kachemak Bay	Bishop's Beach	Low	7
Pre_2012_Kachemak Bay_Bishop's Beach_L_7	Cladophora / Chaetomorpha	0	Before	2012	Kachemak Bay	Bishop's Beach	Low	7
Pre_2012_Kachemak Bay_Bishop's Beach_L_7	Cryptosiphonia	0	Before	2012	Kachemak Bay	Bishop's Beach	Low	7
Pre_2012_Kachemak Bay_Bishop's Beach_L_7	Devaleraea / Palmaria	1.33333	Before	2012	Kachemak Bay	Bishop's Beach	Low	7
Pre_2012_Kachemak Bay_Bishop's Beach_L_7	encrusting coralline algae	8.66667	Before	2012	Kachemak Bay	Bishop's Beach	Low	7
Pre_2012_Kachemak Bay_Bishop's Beach_L_7	Fucus	0	Before	2012	Kachemak Bay	Bishop's Beach	Low	7
Pre_2012_Kachemak Bay_Bishop's Beach_L_7	Gloiopeltis	0	Before	2012	Kachemak Bay	Bishop's Beach	Low	7
Pre_2012_Kachemak Bay_Bishop's Beach_L_7	Halosaccion	0	Before	2012	Kachemak Bay	Bishop's Beach	Low	7
Pre_2012_Kachemak Bay_Bishop's Beach_L_7	Mastocarpus / Mazaella	0	Before	2012	Kachemak Bay	Bishop's Beach	Low	7
Pre_2012_Kachemak Bay_Bishop's Beach_L_7	Mytilus	0	Before	2012	Kachemak Bay	Bishop's Beach	Low	7
Pre_2012_Kachemak Bay_Bishop's Beach_L_7	non-coralline algal crust	0	Before	2012	Kachemak Bay	Bishop's Beach	Low	7
Pre_2012_Kachemak Bay_Bishop's Beach_L_7	Odonthalia / Neorhodomela	0	Before	2012	Kachemak Bay	Bishop's Beach	Low	7
Pre_2012_Kachemak Bay_Bishop's Beach_L_7	Savoiea / Polysiphonia	0	Before	2012	Kachemak Bay	Bishop's Beach	Low	7
Pre_2012_Kachemak Bay_Bishop's Beach_L_7	Ulva / Monostroma	0	Before	2012	Kachemak Bay	Bishop's Beach	Low	7
Pre_2012_Kachemak Bay_Bishop's Beach_L_8	Acrosiphonia	10	Before	2012	Kachemak Bay	Bishop's Beach	Low	8
Pre_2012_Kachemak Bay_Bishop's Beach_L_8	Alaria	6.66667	Before	2012	Kachemak Bay	Bishop's Beach	Low	8
Pre_2012_Kachemak Bay_Bishop's Beach_L_8	bare substrate	20	Before	2012	Kachemak Bay	Bishop's Beach	Low	8
Pre_2012_Kachemak Bay_Bishop's Beach_L_8	barnacles	0	Before	2012	Kachemak Bay	Bishop's Beach	Low	8
Pre_2012_Kachemak Bay_Bishop's Beach_L_8	Boreophyllum / Pyropia / Wildemania	0	Before	2012	Kachemak Bay	Bishop's Beach	Low	8
Pre_2012_Kachemak Bay_Bishop's Beach_L_8	Cladophora / Chaetomorpha	0	Before	2012	Kachemak Bay	Bishop's Beach	Low	8
Pre_2012_Kachemak Bay_Bishop's Beach_L_8	Cryptosiphonia	0	Before	2012	Kachemak Bay	Bishop's Beach	Low	8
Pre_2012_Kachemak Bay_Bishop's Beach_L_8	Devaleraea / Palmaria	0	Before	2012	Kachemak Bay	Bishop's Beach	Low	8
Pre_2012_Kachemak Bay_Bishop's Beach_L_8	encrusting coralline algae	10	Before	2012	Kachemak Bay	Bishop's Beach	Low	8
Pre_2012_Kachemak Bay_Bishop's Beach_L_8	Fucus	0	Before	2012	Kachemak Bay	Bishop's Beach	Low	8
Pre_2012_Kachemak Bay_Bishop's Beach_L_8	Gloiopeltis	0	Before	2012	Kachemak Bay	Bishop's Beach	Low	8
Pre_2012_Kachemak Bay_Bishop's Beach_L_8	Halosaccion	0	Before	2012	Kachemak Bay	Bishop's Beach	Low	8
Pre_2012_Kachemak Bay_Bishop's Beach_L_8	Mastocarpus / Mazaella	0	Before	2012	Kachemak Bay	Bishop's Beach	Low	8
Pre_2012_Kachemak Bay_Bishop's Beach_L_8	Mytilus	0	Before	2012	Kachemak Bay	Bishop's Beach	Low	8
Pre_2012_Kachemak Bay_Bishop's Beach_L_8	non-coralline algal crust	0	Before	2012	Kachemak Bay	Bishop's Beach	Low	8
Pre_2012_Kachemak Bay_Bishop's Beach_L_8	Odonthalia / Neorhodomela	0	Before	2012	Kachemak Bay	Bishop's Beach	Low	8
Pre_2012_Kachemak Bay_Bishop's Beach_L_8	Savoiea / Polysiphonia	0	Before	2012	Kachemak Bay	Bishop's Beach	Low	8
Pre_2012_Kachemak Bay_Bishop's Beach_L_8	Ulva / Monostroma	0	Before	2012	Kachemak Bay	Bishop's Beach	Low	8
Pre_2012_Kachemak Bay_Bishop's Beach_L_9	Acrosiphonia	2.45902	Before	2012	Kachemak Bay	Bishop's Beach	Low	9
Pre_2012_Kachemak Bay_Bishop's Beach_L_9	Alaria	5.7377	Before	2012	Kachemak Bay	Bishop's Beach	Low	9
Pre_2012_Kachemak Bay_Bishop's Beach_L_9	bare substrate	57.377	Before	2012	Kachemak Bay	Bishop's Beach	Low	9
Pre_2012_Kachemak Bay_Bishop's Beach_L_9	barnacles	0	Before	2012	Kachemak Bay	Bishop's Beach	Low	9
Pre_2012_Kachemak Bay_Bishop's Beach_L_9	Boreophyllum / Pyropia / Wildemania	0	Before	2012	Kachemak Bay	Bishop's Beach	Low	9
Pre_2012_Kachemak Bay_Bishop's Beach_L_9	Cladophora / Chaetomorpha	0	Before	2012	Kachemak Bay	Bishop's Beach	Low	9
Pre_2012_Kachemak Bay_Bishop's Beach_L_9	Cryptosiphonia	0	Before	2012	Kachemak Bay	Bishop's Beach	Low	9
Pre_2012_Kachemak Bay_Bishop's Beach_L_9	Devaleraea / Palmaria	0	Before	2012	Kachemak Bay	Bishop's Beach	Low	9
Pre_2012_Kachemak Bay_Bishop's Beach_L_9	encrusting coralline algae	0	Before	2012	Kachemak Bay	Bishop's Beach	Low	9
Pre_2012_Kachemak Bay_Bishop's Beach_L_9	Fucus	0	Before	2012	Kachemak Bay	Bishop's Beach	Low	9
Pre_2012_Kachemak Bay_Bishop's Beach_L_9	Gloiopeltis	0	Before	2012	Kachemak Bay	Bishop's Beach	Low	9
Pre_2012_Kachemak Bay_Bishop's Beach_L_9	Halosaccion	0	Before	2012	Kachemak Bay	Bishop's Beach	Low	9
Pre_2012_Kachemak Bay_Bishop's Beach_L_9	Mastocarpus / Mazaella	0	Before	2012	Kachemak Bay	Bishop's Beach	Low	9
Pre_2012_Kachemak Bay_Bishop's Beach_L_9	Mytilus	0	Before	2012	Kachemak Bay	Bishop's Beach	Low	9
Pre_2012_Kachemak Bay_Bishop's Beach_L_9	non-coralline algal crust	0	Before	2012	Kachemak Bay	Bishop's Beach	Low	9
Pre_2012_Kachemak Bay_Bishop's Beach_L_9	Odonthalia / Neorhodomela	0	Before	2012	Kachemak Bay	Bishop's Beach	Low	9
Pre_2012_Kachemak Bay_Bishop's Beach_L_9	Savoiea / Polysiphonia	3.27869	Before	2012	Kachemak Bay	Bishop's Beach	Low	9
Pre_2012_Kachemak Bay_Bishop's Beach_L_9	Ulva / Monostroma	0	Before	2012	Kachemak Bay	Bishop's Beach	Low	9
Pre_2012_Kachemak Bay_Bishop's Beach_L_10	Acrosiphonia	0	Before	2012	Kachemak Bay	Bishop's Beach	Low	10
Pre_2012_Kachemak Bay_Bishop's Beach_L_10	Alaria	6.25	Before	2012	Kachemak Bay	Bishop's Beach	Low	10
Pre_2012_Kachemak Bay_Bishop's Beach_L_10	bare substrate	50	Before	2012	Kachemak Bay	Bishop's Beach	Low	10
Pre_2012_Kachemak Bay_Bishop's Beach_L_10	barnacles	0	Before	2012	Kachemak Bay	Bishop's Beach	Low	10
Pre_2012_Kachemak Bay_Bishop's Beach_L_10	Boreophyllum / Pyropia / Wildemania	0	Before	2012	Kachemak Bay	Bishop's Beach	Low	10
Pre_2012_Kachemak Bay_Bishop's Beach_L_10	Cladophora / Chaetomorpha	0	Before	2012	Kachemak Bay	Bishop's Beach	Low	10
Pre_2012_Kachemak Bay_Bishop's Beach_L_10	Cryptosiphonia	0	Before	2012	Kachemak Bay	Bishop's Beach	Low	10
Pre_2012_Kachemak Bay_Bishop's Beach_L_10	Devaleraea / Palmaria	13.3929	Before	2012	Kachemak Bay	Bishop's Beach	Low	10
Pre_2012_Kachemak Bay_Bishop's Beach_L_10	encrusting coralline algae	0	Before	2012	Kachemak Bay	Bishop's Beach	Low	10
Pre_2012_Kachemak Bay_Bishop's Beach_L_10	Fucus	2.67857	Before	2012	Kachemak Bay	Bishop's Beach	Low	10
Pre_2012_Kachemak Bay_Bishop's Beach_L_10	Gloiopeltis	0	Before	2012	Kachemak Bay	Bishop's Beach	Low	10
Pre_2012_Kachemak Bay_Bishop's Beach_L_10	Halosaccion	0	Before	2012	Kachemak Bay	Bishop's Beach	Low	10
Pre_2012_Kachemak Bay_Bishop's Beach_L_10	Mastocarpus / Mazaella	0	Before	2012	Kachemak Bay	Bishop's Beach	Low	10
Pre_2012_Kachemak Bay_Bishop's Beach_L_10	Mytilus	0	Before	2012	Kachemak Bay	Bishop's Beach	Low	10
Pre_2012_Kachemak Bay_Bishop's Beach_L_10	non-coralline algal crust	0	Before	2012	Kachemak Bay	Bishop's Beach	Low	10
Pre_2012_Kachemak Bay_Bishop's Beach_L_10	Odonthalia / Neorhodomela	8.92857	Before	2012	Kachemak Bay	Bishop's Beach	Low	10
Pre_2012_Kachemak Bay_Bishop's Beach_L_10	Savoiea / Polysiphonia	3.57143	Before	2012	Kachemak Bay	Bishop's Beach	Low	10
Pre_2012_Kachemak Bay_Bishop's Beach_L_10	Ulva / Monostroma	6.25	Before	2012	Kachemak Bay	Bishop's Beach	Low	10
Pre_2014_Kachemak Bay_Bishop's Beach_L_1	Acrosiphonia	0	Before	2014	Kachemak Bay	Bishop's Beach	Low	1
Pre_2014_Kachemak Bay_Bishop's Beach_L_1	Alaria	0	Before	2014	Kachemak Bay	Bishop's Beach	Low	1
Pre_2014_Kachemak Bay_Bishop's Beach_L_1	bare substrate	79	Before	2014	Kachemak Bay	Bishop's Beach	Low	1
Pre_2014_Kachemak Bay_Bishop's Beach_L_1	barnacles	0	Before	2014	Kachemak Bay	Bishop's Beach	Low	1
Pre_2014_Kachemak Bay_Bishop's Beach_L_1	Boreophyllum / Pyropia / Wildemania	0	Before	2014	Kachemak Bay	Bishop's Beach	Low	1
Pre_2014_Kachemak Bay_Bishop's Beach_L_1	Cladophora / Chaetomorpha	0	Before	2014	Kachemak Bay	Bishop's Beach	Low	1
Pre_2014_Kachemak Bay_Bishop's Beach_L_1	Cryptosiphonia	0	Before	2014	Kachemak Bay	Bishop's Beach	Low	1
Pre_2014_Kachemak Bay_Bishop's Beach_L_1	Devaleraea / Palmaria	0	Before	2014	Kachemak Bay	Bishop's Beach	Low	1
Pre_2014_Kachemak Bay_Bishop's Beach_L_1	encrusting coralline algae	15	Before	2014	Kachemak Bay	Bishop's Beach	Low	1
Pre_2014_Kachemak Bay_Bishop's Beach_L_1	Fucus	0	Before	2014	Kachemak Bay	Bishop's Beach	Low	1
Pre_2014_Kachemak Bay_Bishop's Beach_L_1	Gloiopeltis	0	Before	2014	Kachemak Bay	Bishop's Beach	Low	1
Pre_2014_Kachemak Bay_Bishop's Beach_L_1	Halosaccion	0	Before	2014	Kachemak Bay	Bishop's Beach	Low	1
Pre_2014_Kachemak Bay_Bishop's Beach_L_1	Mastocarpus / Mazaella	0	Before	2014	Kachemak Bay	Bishop's Beach	Low	1
Pre_2014_Kachemak Bay_Bishop's Beach_L_1	Mytilus	0	Before	2014	Kachemak Bay	Bishop's Beach	Low	1
Pre_2014_Kachemak Bay_Bishop's Beach_L_1	non-coralline algal crust	0	Before	2014	Kachemak Bay	Bishop's Beach	Low	1
Pre_2014_Kachemak Bay_Bishop's Beach_L_1	Odonthalia / Neorhodomela	0	Before	2014	Kachemak Bay	Bishop's Beach	Low	1
Pre_2014_Kachemak Bay_Bishop's Beach_L_1	Savoiea / Polysiphonia	0	Before	2014	Kachemak Bay	Bishop's Beach	Low	1
Pre_2014_Kachemak Bay_Bishop's Beach_L_1	Ulva / Monostroma	0	Before	2014	Kachemak Bay	Bishop's Beach	Low	1
Pre_2014_Kachemak Bay_Bishop's Beach_L_2	Acrosiphonia	0	Before	2014	Kachemak Bay	Bishop's Beach	Low	2
Pre_2014_Kachemak Bay_Bishop's Beach_L_2	Alaria	0	Before	2014	Kachemak Bay	Bishop's Beach	Low	2
Pre_2014_Kachemak Bay_Bishop's Beach_L_2	bare substrate	56.8	Before	2014	Kachemak Bay	Bishop's Beach	Low	2
Pre_2014_Kachemak Bay_Bishop's Beach_L_2	barnacles	0	Before	2014	Kachemak Bay	Bishop's Beach	Low	2
Pre_2014_Kachemak Bay_Bishop's Beach_L_2	Boreophyllum / Pyropia / Wildemania	0	Before	2014	Kachemak Bay	Bishop's Beach	Low	2
Pre_2014_Kachemak Bay_Bishop's Beach_L_2	Cladophora / Chaetomorpha	0	Before	2014	Kachemak Bay	Bishop's Beach	Low	2
Pre_2014_Kachemak Bay_Bishop's Beach_L_2	Cryptosiphonia	1.6	Before	2014	Kachemak Bay	Bishop's Beach	Low	2
Pre_2014_Kachemak Bay_Bishop's Beach_L_2	Devaleraea / Palmaria	4	Before	2014	Kachemak Bay	Bishop's Beach	Low	2
Pre_2014_Kachemak Bay_Bishop's Beach_L_2	encrusting coralline algae	8	Before	2014	Kachemak Bay	Bishop's Beach	Low	2
Pre_2014_Kachemak Bay_Bishop's Beach_L_2	Fucus	0	Before	2014	Kachemak Bay	Bishop's Beach	Low	2
Pre_2014_Kachemak Bay_Bishop's Beach_L_2	Gloiopeltis	0	Before	2014	Kachemak Bay	Bishop's Beach	Low	2
Pre_2014_Kachemak Bay_Bishop's Beach_L_2	Halosaccion	0	Before	2014	Kachemak Bay	Bishop's Beach	Low	2
Pre_2014_Kachemak Bay_Bishop's Beach_L_2	Mastocarpus / Mazaella	0	Before	2014	Kachemak Bay	Bishop's Beach	Low	2
Pre_2014_Kachemak Bay_Bishop's Beach_L_2	Mytilus	0	Before	2014	Kachemak Bay	Bishop's Beach	Low	2
Pre_2014_Kachemak Bay_Bishop's Beach_L_2	non-coralline algal crust	0	Before	2014	Kachemak Bay	Bishop's Beach	Low	2
Pre_2014_Kachemak Bay_Bishop's Beach_L_2	Odonthalia / Neorhodomela	0	Before	2014	Kachemak Bay	Bishop's Beach	Low	2
Pre_2014_Kachemak Bay_Bishop's Beach_L_2	Savoiea / Polysiphonia	0	Before	2014	Kachemak Bay	Bishop's Beach	Low	2
Pre_2014_Kachemak Bay_Bishop's Beach_L_2	Ulva / Monostroma	2.4	Before	2014	Kachemak Bay	Bishop's Beach	Low	2
Pre_2014_Kachemak Bay_Bishop's Beach_L_3	Acrosiphonia	0	Before	2014	Kachemak Bay	Bishop's Beach	Low	3
Pre_2014_Kachemak Bay_Bishop's Beach_L_3	Alaria	0	Before	2014	Kachemak Bay	Bishop's Beach	Low	3
Pre_2014_Kachemak Bay_Bishop's Beach_L_3	bare substrate	90	Before	2014	Kachemak Bay	Bishop's Beach	Low	3
Pre_2014_Kachemak Bay_Bishop's Beach_L_3	barnacles	0	Before	2014	Kachemak Bay	Bishop's Beach	Low	3
Pre_2014_Kachemak Bay_Bishop's Beach_L_3	Boreophyllum / Pyropia / Wildemania	0	Before	2014	Kachemak Bay	Bishop's Beach	Low	3
Pre_2014_Kachemak Bay_Bishop's Beach_L_3	Cladophora / Chaetomorpha	0	Before	2014	Kachemak Bay	Bishop's Beach	Low	3
Pre_2014_Kachemak Bay_Bishop's Beach_L_3	Cryptosiphonia	0	Before	2014	Kachemak Bay	Bishop's Beach	Low	3
Pre_2014_Kachemak Bay_Bishop's Beach_L_3	Devaleraea / Palmaria	0	Before	2014	Kachemak Bay	Bishop's Beach	Low	3
Pre_2014_Kachemak Bay_Bishop's Beach_L_3	encrusting coralline algae	10	Before	2014	Kachemak Bay	Bishop's Beach	Low	3
Pre_2014_Kachemak Bay_Bishop's Beach_L_3	Fucus	0	Before	2014	Kachemak Bay	Bishop's Beach	Low	3
Pre_2014_Kachemak Bay_Bishop's Beach_L_3	Gloiopeltis	0	Before	2014	Kachemak Bay	Bishop's Beach	Low	3
Pre_2014_Kachemak Bay_Bishop's Beach_L_3	Halosaccion	0	Before	2014	Kachemak Bay	Bishop's Beach	Low	3
Pre_2014_Kachemak Bay_Bishop's Beach_L_3	Mastocarpus / Mazaella	0	Before	2014	Kachemak Bay	Bishop's Beach	Low	3
Pre_2014_Kachemak Bay_Bishop's Beach_L_3	Mytilus	0	Before	2014	Kachemak Bay	Bishop's Beach	Low	3
Pre_2014_Kachemak Bay_Bishop's Beach_L_3	non-coralline algal crust	0	Before	2014	Kachemak Bay	Bishop's Beach	Low	3
Pre_2014_Kachemak Bay_Bishop's Beach_L_3	Odonthalia / Neorhodomela	0	Before	2014	Kachemak Bay	Bishop's Beach	Low	3
Pre_2014_Kachemak Bay_Bishop's Beach_L_3	Savoiea / Polysiphonia	0	Before	2014	Kachemak Bay	Bishop's Beach	Low	3
Pre_2014_Kachemak Bay_Bishop's Beach_L_3	Ulva / Monostroma	0	Before	2014	Kachemak Bay	Bishop's Beach	Low	3
Pre_2014_Kachemak Bay_Bishop's Beach_L_4	Acrosiphonia	0	Before	2014	Kachemak Bay	Bishop's Beach	Low	4
Pre_2014_Kachemak Bay_Bishop's Beach_L_4	Alaria	0	Before	2014	Kachemak Bay	Bishop's Beach	Low	4
Pre_2014_Kachemak Bay_Bishop's Beach_L_4	bare substrate	100	Before	2014	Kachemak Bay	Bishop's Beach	Low	4
Pre_2014_Kachemak Bay_Bishop's Beach_L_4	barnacles	0	Before	2014	Kachemak Bay	Bishop's Beach	Low	4
Pre_2014_Kachemak Bay_Bishop's Beach_L_4	Boreophyllum / Pyropia / Wildemania	0	Before	2014	Kachemak Bay	Bishop's Beach	Low	4
Pre_2014_Kachemak Bay_Bishop's Beach_L_4	Cladophora / Chaetomorpha	0	Before	2014	Kachemak Bay	Bishop's Beach	Low	4
Pre_2014_Kachemak Bay_Bishop's Beach_L_4	Cryptosiphonia	0	Before	2014	Kachemak Bay	Bishop's Beach	Low	4
Pre_2014_Kachemak Bay_Bishop's Beach_L_4	Devaleraea / Palmaria	0	Before	2014	Kachemak Bay	Bishop's Beach	Low	4
Pre_2014_Kachemak Bay_Bishop's Beach_L_4	encrusting coralline algae	0	Before	2014	Kachemak Bay	Bishop's Beach	Low	4
Pre_2014_Kachemak Bay_Bishop's Beach_L_4	Fucus	0	Before	2014	Kachemak Bay	Bishop's Beach	Low	4
Pre_2014_Kachemak Bay_Bishop's Beach_L_4	Gloiopeltis	0	Before	2014	Kachemak Bay	Bishop's Beach	Low	4
Pre_2014_Kachemak Bay_Bishop's Beach_L_4	Halosaccion	0	Before	2014	Kachemak Bay	Bishop's Beach	Low	4
Pre_2014_Kachemak Bay_Bishop's Beach_L_4	Mastocarpus / Mazaella	0	Before	2014	Kachemak Bay	Bishop's Beach	Low	4
Pre_2014_Kachemak Bay_Bishop's Beach_L_4	Mytilus	0	Before	2014	Kachemak Bay	Bishop's Beach	Low	4
Pre_2014_Kachemak Bay_Bishop's Beach_L_4	non-coralline algal crust	0	Before	2014	Kachemak Bay	Bishop's Beach	Low	4
Pre_2014_Kachemak Bay_Bishop's Beach_L_4	Odonthalia / Neorhodomela	0	Before	2014	Kachemak Bay	Bishop's Beach	Low	4
Pre_2014_Kachemak Bay_Bishop's Beach_L_4	Savoiea / Polysiphonia	0	Before	2014	Kachemak Bay	Bishop's Beach	Low	4
Pre_2014_Kachemak Bay_Bishop's Beach_L_4	Ulva / Monostroma	0	Before	2014	Kachemak Bay	Bishop's Beach	Low	4
Pre_2014_Kachemak Bay_Bishop's Beach_L_5	Acrosiphonia	0	Before	2014	Kachemak Bay	Bishop's Beach	Low	5
Pre_2014_Kachemak Bay_Bishop's Beach_L_5	Alaria	0	Before	2014	Kachemak Bay	Bishop's Beach	Low	5
Pre_2014_Kachemak Bay_Bishop's Beach_L_5	bare substrate	4.54545	Before	2014	Kachemak Bay	Bishop's Beach	Low	5
Pre_2014_Kachemak Bay_Bishop's Beach_L_5	barnacles	0	Before	2014	Kachemak Bay	Bishop's Beach	Low	5
Pre_2014_Kachemak Bay_Bishop's Beach_L_5	Boreophyllum / Pyropia / Wildemania	0	Before	2014	Kachemak Bay	Bishop's Beach	Low	5
Pre_2014_Kachemak Bay_Bishop's Beach_L_5	Cladophora / Chaetomorpha	0	Before	2014	Kachemak Bay	Bishop's Beach	Low	5
Pre_2014_Kachemak Bay_Bishop's Beach_L_5	Cryptosiphonia	0	Before	2014	Kachemak Bay	Bishop's Beach	Low	5
Pre_2014_Kachemak Bay_Bishop's Beach_L_5	Devaleraea / Palmaria	2.72727	Before	2014	Kachemak Bay	Bishop's Beach	Low	5
Pre_2014_Kachemak Bay_Bishop's Beach_L_5	encrusting coralline algae	4.54545	Before	2014	Kachemak Bay	Bishop's Beach	Low	5
Pre_2014_Kachemak Bay_Bishop's Beach_L_5	Fucus	4.54545	Before	2014	Kachemak Bay	Bishop's Beach	Low	5
Pre_2014_Kachemak Bay_Bishop's Beach_L_5	Gloiopeltis	0	Before	2014	Kachemak Bay	Bishop's Beach	Low	5
Pre_2014_Kachemak Bay_Bishop's Beach_L_5	Halosaccion	0	Before	2014	Kachemak Bay	Bishop's Beach	Low	5
Pre_2014_Kachemak Bay_Bishop's Beach_L_5	Mastocarpus / Mazaella	0	Before	2014	Kachemak Bay	Bishop's Beach	Low	5
Pre_2014_Kachemak Bay_Bishop's Beach_L_5	Mytilus	0	Before	2014	Kachemak Bay	Bishop's Beach	Low	5
Pre_2014_Kachemak Bay_Bishop's Beach_L_5	non-coralline algal crust	0	Before	2014	Kachemak Bay	Bishop's Beach	Low	5
Pre_2014_Kachemak Bay_Bishop's Beach_L_5	Odonthalia / Neorhodomela	0	Before	2014	Kachemak Bay	Bishop's Beach	Low	5
Pre_2014_Kachemak Bay_Bishop's Beach_L_5	Savoiea / Polysiphonia	0	Before	2014	Kachemak Bay	Bishop's Beach	Low	5
Pre_2014_Kachemak Bay_Bishop's Beach_L_5	Ulva / Monostroma	0	Before	2014	Kachemak Bay	Bishop's Beach	Low	5
Pre_2014_Kachemak Bay_Bishop's Beach_L_6	Acrosiphonia	0	Before	2014	Kachemak Bay	Bishop's Beach	Low	6
Pre_2014_Kachemak Bay_Bishop's Beach_L_6	Alaria	13.125	Before	2014	Kachemak Bay	Bishop's Beach	Low	6
Pre_2014_Kachemak Bay_Bishop's Beach_L_6	bare substrate	20	Before	2014	Kachemak Bay	Bishop's Beach	Low	6
Pre_2014_Kachemak Bay_Bishop's Beach_L_6	barnacles	0	Before	2014	Kachemak Bay	Bishop's Beach	Low	6
Pre_2014_Kachemak Bay_Bishop's Beach_L_6	Boreophyllum / Pyropia / Wildemania	0	Before	2014	Kachemak Bay	Bishop's Beach	Low	6
Pre_2014_Kachemak Bay_Bishop's Beach_L_6	Cladophora / Chaetomorpha	0	Before	2014	Kachemak Bay	Bishop's Beach	Low	6
Pre_2014_Kachemak Bay_Bishop's Beach_L_6	Cryptosiphonia	0	Before	2014	Kachemak Bay	Bishop's Beach	Low	6
Pre_2014_Kachemak Bay_Bishop's Beach_L_6	Devaleraea / Palmaria	3.125	Before	2014	Kachemak Bay	Bishop's Beach	Low	6
Pre_2014_Kachemak Bay_Bishop's Beach_L_6	encrusting coralline algae	9.375	Before	2014	Kachemak Bay	Bishop's Beach	Low	6
Pre_2014_Kachemak Bay_Bishop's Beach_L_6	Fucus	3.125	Before	2014	Kachemak Bay	Bishop's Beach	Low	6
Pre_2014_Kachemak Bay_Bishop's Beach_L_6	Gloiopeltis	0	Before	2014	Kachemak Bay	Bishop's Beach	Low	6
Pre_2014_Kachemak Bay_Bishop's Beach_L_6	Halosaccion	0	Before	2014	Kachemak Bay	Bishop's Beach	Low	6
Pre_2014_Kachemak Bay_Bishop's Beach_L_6	Mastocarpus / Mazaella	0	Before	2014	Kachemak Bay	Bishop's Beach	Low	6
Pre_2014_Kachemak Bay_Bishop's Beach_L_6	Mytilus	0	Before	2014	Kachemak Bay	Bishop's Beach	Low	6
Pre_2014_Kachemak Bay_Bishop's Beach_L_6	non-coralline algal crust	0	Before	2014	Kachemak Bay	Bishop's Beach	Low	6
Pre_2014_Kachemak Bay_Bishop's Beach_L_6	Odonthalia / Neorhodomela	3.125	Before	2014	Kachemak Bay	Bishop's Beach	Low	6
Pre_2014_Kachemak Bay_Bishop's Beach_L_6	Savoiea / Polysiphonia	0	Before	2014	Kachemak Bay	Bishop's Beach	Low	6
Pre_2014_Kachemak Bay_Bishop's Beach_L_6	Ulva / Monostroma	3.125	Before	2014	Kachemak Bay	Bishop's Beach	Low	6
Pre_2014_Kachemak Bay_Bishop's Beach_L_7	Acrosiphonia	0	Before	2014	Kachemak Bay	Bishop's Beach	Low	7
Pre_2014_Kachemak Bay_Bishop's Beach_L_7	Alaria	2.07254	Before	2014	Kachemak Bay	Bishop's Beach	Low	7
Pre_2014_Kachemak Bay_Bishop's Beach_L_7	bare substrate	22.7979	Before	2014	Kachemak Bay	Bishop's Beach	Low	7
Pre_2014_Kachemak Bay_Bishop's Beach_L_7	barnacles	0	Before	2014	Kachemak Bay	Bishop's Beach	Low	7
Pre_2014_Kachemak Bay_Bishop's Beach_L_7	Boreophyllum / Pyropia / Wildemania	0	Before	2014	Kachemak Bay	Bishop's Beach	Low	7
Pre_2014_Kachemak Bay_Bishop's Beach_L_7	Cladophora / Chaetomorpha	0	Before	2014	Kachemak Bay	Bishop's Beach	Low	7
Pre_2014_Kachemak Bay_Bishop's Beach_L_7	Cryptosiphonia	0	Before	2014	Kachemak Bay	Bishop's Beach	Low	7
Pre_2014_Kachemak Bay_Bishop's Beach_L_7	Devaleraea / Palmaria	1.5544	Before	2014	Kachemak Bay	Bishop's Beach	Low	7
Pre_2014_Kachemak Bay_Bishop's Beach_L_7	encrusting coralline algae	10.3627	Before	2014	Kachemak Bay	Bishop's Beach	Low	7
Pre_2014_Kachemak Bay_Bishop's Beach_L_7	Fucus	0	Before	2014	Kachemak Bay	Bishop's Beach	Low	7
Pre_2014_Kachemak Bay_Bishop's Beach_L_7	Gloiopeltis	0	Before	2014	Kachemak Bay	Bishop's Beach	Low	7
Pre_2014_Kachemak Bay_Bishop's Beach_L_7	Halosaccion	0	Before	2014	Kachemak Bay	Bishop's Beach	Low	7
Pre_2014_Kachemak Bay_Bishop's Beach_L_7	Mastocarpus / Mazaella	0	Before	2014	Kachemak Bay	Bishop's Beach	Low	7
Pre_2014_Kachemak Bay_Bishop's Beach_L_7	Mytilus	0	Before	2014	Kachemak Bay	Bishop's Beach	Low	7
Pre_2014_Kachemak Bay_Bishop's Beach_L_7	non-coralline algal crust	0	Before	2014	Kachemak Bay	Bishop's Beach	Low	7
Pre_2014_Kachemak Bay_Bishop's Beach_L_7	Odonthalia / Neorhodomela	0	Before	2014	Kachemak Bay	Bishop's Beach	Low	7
Pre_2014_Kachemak Bay_Bishop's Beach_L_7	Savoiea / Polysiphonia	1.03627	Before	2014	Kachemak Bay	Bishop's Beach	Low	7
Pre_2014_Kachemak Bay_Bishop's Beach_L_7	Ulva / Monostroma	0.518135	Before	2014	Kachemak Bay	Bishop's Beach	Low	7
Pre_2014_Kachemak Bay_Bishop's Beach_L_8	Acrosiphonia	0	Before	2014	Kachemak Bay	Bishop's Beach	Low	8
Pre_2014_Kachemak Bay_Bishop's Beach_L_8	Alaria	0	Before	2014	Kachemak Bay	Bishop's Beach	Low	8
Pre_2014_Kachemak Bay_Bishop's Beach_L_8	bare substrate	18.2857	Before	2014	Kachemak Bay	Bishop's Beach	Low	8
Pre_2014_Kachemak Bay_Bishop's Beach_L_8	barnacles	0	Before	2014	Kachemak Bay	Bishop's Beach	Low	8
Pre_2014_Kachemak Bay_Bishop's Beach_L_8	Boreophyllum / Pyropia / Wildemania	0	Before	2014	Kachemak Bay	Bishop's Beach	Low	8
Pre_2014_Kachemak Bay_Bishop's Beach_L_8	Cladophora / Chaetomorpha	0	Before	2014	Kachemak Bay	Bishop's Beach	Low	8
Pre_2014_Kachemak Bay_Bishop's Beach_L_8	Cryptosiphonia	0	Before	2014	Kachemak Bay	Bishop's Beach	Low	8
Pre_2014_Kachemak Bay_Bishop's Beach_L_8	Devaleraea / Palmaria	2.85714	Before	2014	Kachemak Bay	Bishop's Beach	Low	8
Pre_2014_Kachemak Bay_Bishop's Beach_L_8	encrusting coralline algae	17.1429	Before	2014	Kachemak Bay	Bishop's Beach	Low	8
Pre_2014_Kachemak Bay_Bishop's Beach_L_8	Fucus	0	Before	2014	Kachemak Bay	Bishop's Beach	Low	8
Pre_2014_Kachemak Bay_Bishop's Beach_L_8	Gloiopeltis	0	Before	2014	Kachemak Bay	Bishop's Beach	Low	8
Pre_2014_Kachemak Bay_Bishop's Beach_L_8	Halosaccion	0	Before	2014	Kachemak Bay	Bishop's Beach	Low	8
Pre_2014_Kachemak Bay_Bishop's Beach_L_8	Mastocarpus / Mazaella	0	Before	2014	Kachemak Bay	Bishop's Beach	Low	8
Pre_2014_Kachemak Bay_Bishop's Beach_L_8	Mytilus	0	Before	2014	Kachemak Bay	Bishop's Beach	Low	8
Pre_2014_Kachemak Bay_Bishop's Beach_L_8	non-coralline algal crust	0	Before	2014	Kachemak Bay	Bishop's Beach	Low	8
Pre_2014_Kachemak Bay_Bishop's Beach_L_8	Odonthalia / Neorhodomela	0	Before	2014	Kachemak Bay	Bishop's Beach	Low	8
Pre_2014_Kachemak Bay_Bishop's Beach_L_8	Savoiea / Polysiphonia	0	Before	2014	Kachemak Bay	Bishop's Beach	Low	8
Pre_2014_Kachemak Bay_Bishop's Beach_L_8	Ulva / Monostroma	0	Before	2014	Kachemak Bay	Bishop's Beach	Low	8
Pre_2014_Kachemak Bay_Bishop's Beach_L_9	Acrosiphonia	0	Before	2014	Kachemak Bay	Bishop's Beach	Low	9
Pre_2014_Kachemak Bay_Bishop's Beach_L_9	Alaria	0	Before	2014	Kachemak Bay	Bishop's Beach	Low	9
Pre_2014_Kachemak Bay_Bishop's Beach_L_9	bare substrate	7.5	Before	2014	Kachemak Bay	Bishop's Beach	Low	9
Pre_2014_Kachemak Bay_Bishop's Beach_L_9	barnacles	0	Before	2014	Kachemak Bay	Bishop's Beach	Low	9
Pre_2014_Kachemak Bay_Bishop's Beach_L_9	Boreophyllum / Pyropia / Wildemania	0	Before	2014	Kachemak Bay	Bishop's Beach	Low	9
Pre_2014_Kachemak Bay_Bishop's Beach_L_9	Cladophora / Chaetomorpha	0	Before	2014	Kachemak Bay	Bishop's Beach	Low	9
Pre_2014_Kachemak Bay_Bishop's Beach_L_9	Cryptosiphonia	0	Before	2014	Kachemak Bay	Bishop's Beach	Low	9
Pre_2014_Kachemak Bay_Bishop's Beach_L_9	Devaleraea / Palmaria	0	Before	2014	Kachemak Bay	Bishop's Beach	Low	9
Pre_2014_Kachemak Bay_Bishop's Beach_L_9	encrusting coralline algae	30	Before	2014	Kachemak Bay	Bishop's Beach	Low	9
Pre_2014_Kachemak Bay_Bishop's Beach_L_9	Fucus	0	Before	2014	Kachemak Bay	Bishop's Beach	Low	9
Pre_2014_Kachemak Bay_Bishop's Beach_L_9	Gloiopeltis	0	Before	2014	Kachemak Bay	Bishop's Beach	Low	9
Pre_2014_Kachemak Bay_Bishop's Beach_L_9	Halosaccion	0	Before	2014	Kachemak Bay	Bishop's Beach	Low	9
Pre_2014_Kachemak Bay_Bishop's Beach_L_9	Mastocarpus / Mazaella	0	Before	2014	Kachemak Bay	Bishop's Beach	Low	9
Pre_2014_Kachemak Bay_Bishop's Beach_L_9	Mytilus	0	Before	2014	Kachemak Bay	Bishop's Beach	Low	9
Pre_2014_Kachemak Bay_Bishop's Beach_L_9	non-coralline algal crust	0	Before	2014	Kachemak Bay	Bishop's Beach	Low	9
Pre_2014_Kachemak Bay_Bishop's Beach_L_9	Odonthalia / Neorhodomela	0	Before	2014	Kachemak Bay	Bishop's Beach	Low	9
Pre_2014_Kachemak Bay_Bishop's Beach_L_9	Savoiea / Polysiphonia	0	Before	2014	Kachemak Bay	Bishop's Beach	Low	9
Pre_2014_Kachemak Bay_Bishop's Beach_L_9	Ulva / Monostroma	3	Before	2014	Kachemak Bay	Bishop's Beach	Low	9
Pre_2014_Kachemak Bay_Bishop's Beach_L_10	Acrosiphonia	0	Before	2014	Kachemak Bay	Bishop's Beach	Low	10
Pre_2014_Kachemak Bay_Bishop's Beach_L_10	Alaria	0	Before	2014	Kachemak Bay	Bishop's Beach	Low	10
Pre_2014_Kachemak Bay_Bishop's Beach_L_10	bare substrate	9.375	Before	2014	Kachemak Bay	Bishop's Beach	Low	10
Pre_2014_Kachemak Bay_Bishop's Beach_L_10	barnacles	0	Before	2014	Kachemak Bay	Bishop's Beach	Low	10
Pre_2014_Kachemak Bay_Bishop's Beach_L_10	Boreophyllum / Pyropia / Wildemania	0	Before	2014	Kachemak Bay	Bishop's Beach	Low	10
Pre_2014_Kachemak Bay_Bishop's Beach_L_10	Cladophora / Chaetomorpha	0	Before	2014	Kachemak Bay	Bishop's Beach	Low	10
Pre_2014_Kachemak Bay_Bishop's Beach_L_10	Cryptosiphonia	0	Before	2014	Kachemak Bay	Bishop's Beach	Low	10
Pre_2014_Kachemak Bay_Bishop's Beach_L_10	Devaleraea / Palmaria	1.25	Before	2014	Kachemak Bay	Bishop's Beach	Low	10
Pre_2014_Kachemak Bay_Bishop's Beach_L_10	encrusting coralline algae	31.25	Before	2014	Kachemak Bay	Bishop's Beach	Low	10
Pre_2014_Kachemak Bay_Bishop's Beach_L_10	Fucus	0	Before	2014	Kachemak Bay	Bishop's Beach	Low	10
Pre_2014_Kachemak Bay_Bishop's Beach_L_10	Gloiopeltis	0	Before	2014	Kachemak Bay	Bishop's Beach	Low	10
Pre_2014_Kachemak Bay_Bishop's Beach_L_10	Halosaccion	0	Before	2014	Kachemak Bay	Bishop's Beach	Low	10
Pre_2014_Kachemak Bay_Bishop's Beach_L_10	Mastocarpus / Mazaella	0	Before	2014	Kachemak Bay	Bishop's Beach	Low	10
Pre_2014_Kachemak Bay_Bishop's Beach_L_10	Mytilus	0	Before	2014	Kachemak Bay	Bishop's Beach	Low	10
Pre_2014_Kachemak Bay_Bishop's Beach_L_10	non-coralline algal crust	0	Before	2014	Kachemak Bay	Bishop's Beach	Low	10
Pre_2014_Kachemak Bay_Bishop's Beach_L_10	Odonthalia / Neorhodomela	0	Before	2014	Kachemak Bay	Bishop's Beach	Low	10
Pre_2014_Kachemak Bay_Bishop's Beach_L_10	Savoiea / Polysiphonia	0	Before	2014	Kachemak Bay	Bishop's Beach	Low	10
Pre_2014_Kachemak Bay_Bishop's Beach_L_10	Ulva / Monostroma	1.875	Before	2014	Kachemak Bay	Bishop's Beach	Low	10
Post_2016_Kachemak Bay_Bishop's Beach_L_1	Acrosiphonia	0	During	2016	Kachemak Bay	Bishop's Beach	Low	1
Post_2016_Kachemak Bay_Bishop's Beach_L_1	Alaria	0	During	2016	Kachemak Bay	Bishop's Beach	Low	1
Post_2016_Kachemak Bay_Bishop's Beach_L_1	bare substrate	33	During	2016	Kachemak Bay	Bishop's Beach	Low	1
Post_2016_Kachemak Bay_Bishop's Beach_L_1	barnacles	0	During	2016	Kachemak Bay	Bishop's Beach	Low	1
Post_2016_Kachemak Bay_Bishop's Beach_L_1	Boreophyllum / Pyropia / Wildemania	0.5	During	2016	Kachemak Bay	Bishop's Beach	Low	1
Post_2016_Kachemak Bay_Bishop's Beach_L_1	Cladophora / Chaetomorpha	0	During	2016	Kachemak Bay	Bishop's Beach	Low	1
Post_2016_Kachemak Bay_Bishop's Beach_L_1	Cryptosiphonia	0	During	2016	Kachemak Bay	Bishop's Beach	Low	1
Post_2016_Kachemak Bay_Bishop's Beach_L_1	Devaleraea / Palmaria	0.5	During	2016	Kachemak Bay	Bishop's Beach	Low	1
Post_2016_Kachemak Bay_Bishop's Beach_L_1	encrusting coralline algae	2.5	During	2016	Kachemak Bay	Bishop's Beach	Low	1
Post_2016_Kachemak Bay_Bishop's Beach_L_1	Fucus	0	During	2016	Kachemak Bay	Bishop's Beach	Low	1
Post_2016_Kachemak Bay_Bishop's Beach_L_1	Gloiopeltis	0	During	2016	Kachemak Bay	Bishop's Beach	Low	1
Post_2016_Kachemak Bay_Bishop's Beach_L_1	Halosaccion	0	During	2016	Kachemak Bay	Bishop's Beach	Low	1
Post_2016_Kachemak Bay_Bishop's Beach_L_1	Mastocarpus / Mazaella	0	During	2016	Kachemak Bay	Bishop's Beach	Low	1
Post_2016_Kachemak Bay_Bishop's Beach_L_1	Mytilus	0	During	2016	Kachemak Bay	Bishop's Beach	Low	1
Post_2016_Kachemak Bay_Bishop's Beach_L_1	non-coralline algal crust	0	During	2016	Kachemak Bay	Bishop's Beach	Low	1
Post_2016_Kachemak Bay_Bishop's Beach_L_1	Odonthalia / Neorhodomela	1	During	2016	Kachemak Bay	Bishop's Beach	Low	1
Post_2016_Kachemak Bay_Bishop's Beach_L_1	Savoiea / Polysiphonia	7.5	During	2016	Kachemak Bay	Bishop's Beach	Low	1
Post_2016_Kachemak Bay_Bishop's Beach_L_1	Ulva / Monostroma	1.5	During	2016	Kachemak Bay	Bishop's Beach	Low	1
Post_2016_Kachemak Bay_Bishop's Beach_L_2	Acrosiphonia	0	During	2016	Kachemak Bay	Bishop's Beach	Low	2
Post_2016_Kachemak Bay_Bishop's Beach_L_2	Alaria	0	During	2016	Kachemak Bay	Bishop's Beach	Low	2
Post_2016_Kachemak Bay_Bishop's Beach_L_2	bare substrate	30	During	2016	Kachemak Bay	Bishop's Beach	Low	2
Post_2016_Kachemak Bay_Bishop's Beach_L_2	barnacles	0	During	2016	Kachemak Bay	Bishop's Beach	Low	2
Post_2016_Kachemak Bay_Bishop's Beach_L_2	Boreophyllum / Pyropia / Wildemania	0	During	2016	Kachemak Bay	Bishop's Beach	Low	2
Post_2016_Kachemak Bay_Bishop's Beach_L_2	Cladophora / Chaetomorpha	0	During	2016	Kachemak Bay	Bishop's Beach	Low	2
Post_2016_Kachemak Bay_Bishop's Beach_L_2	Cryptosiphonia	0	During	2016	Kachemak Bay	Bishop's Beach	Low	2
Post_2016_Kachemak Bay_Bishop's Beach_L_2	Devaleraea / Palmaria	5	During	2016	Kachemak Bay	Bishop's Beach	Low	2
Post_2016_Kachemak Bay_Bishop's Beach_L_2	encrusting coralline algae	7.5	During	2016	Kachemak Bay	Bishop's Beach	Low	2
Post_2016_Kachemak Bay_Bishop's Beach_L_2	Fucus	0	During	2016	Kachemak Bay	Bishop's Beach	Low	2
Post_2016_Kachemak Bay_Bishop's Beach_L_2	Gloiopeltis	0	During	2016	Kachemak Bay	Bishop's Beach	Low	2
Post_2016_Kachemak Bay_Bishop's Beach_L_2	Halosaccion	0	During	2016	Kachemak Bay	Bishop's Beach	Low	2
Post_2016_Kachemak Bay_Bishop's Beach_L_2	Mastocarpus / Mazaella	0	During	2016	Kachemak Bay	Bishop's Beach	Low	2
Post_2016_Kachemak Bay_Bishop's Beach_L_2	Mytilus	0	During	2016	Kachemak Bay	Bishop's Beach	Low	2
Post_2016_Kachemak Bay_Bishop's Beach_L_2	non-coralline algal crust	0	During	2016	Kachemak Bay	Bishop's Beach	Low	2
Post_2016_Kachemak Bay_Bishop's Beach_L_2	Odonthalia / Neorhodomela	0	During	2016	Kachemak Bay	Bishop's Beach	Low	2
Post_2016_Kachemak Bay_Bishop's Beach_L_2	Savoiea / Polysiphonia	2.5	During	2016	Kachemak Bay	Bishop's Beach	Low	2
Post_2016_Kachemak Bay_Bishop's Beach_L_2	Ulva / Monostroma	2.5	During	2016	Kachemak Bay	Bishop's Beach	Low	2
Post_2016_Kachemak Bay_Bishop's Beach_L_3	Acrosiphonia	0	During	2016	Kachemak Bay	Bishop's Beach	Low	3
Post_2016_Kachemak Bay_Bishop's Beach_L_3	Alaria	0	During	2016	Kachemak Bay	Bishop's Beach	Low	3
Post_2016_Kachemak Bay_Bishop's Beach_L_3	bare substrate	26	During	2016	Kachemak Bay	Bishop's Beach	Low	3
Post_2016_Kachemak Bay_Bishop's Beach_L_3	barnacles	0	During	2016	Kachemak Bay	Bishop's Beach	Low	3
Post_2016_Kachemak Bay_Bishop's Beach_L_3	Boreophyllum / Pyropia / Wildemania	0	During	2016	Kachemak Bay	Bishop's Beach	Low	3
Post_2016_Kachemak Bay_Bishop's Beach_L_3	Cladophora / Chaetomorpha	0	During	2016	Kachemak Bay	Bishop's Beach	Low	3
Post_2016_Kachemak Bay_Bishop's Beach_L_3	Cryptosiphonia	0	During	2016	Kachemak Bay	Bishop's Beach	Low	3
Post_2016_Kachemak Bay_Bishop's Beach_L_3	Devaleraea / Palmaria	0	During	2016	Kachemak Bay	Bishop's Beach	Low	3
Post_2016_Kachemak Bay_Bishop's Beach_L_3	encrusting coralline algae	20	During	2016	Kachemak Bay	Bishop's Beach	Low	3
Post_2016_Kachemak Bay_Bishop's Beach_L_3	Fucus	0	During	2016	Kachemak Bay	Bishop's Beach	Low	3
Post_2016_Kachemak Bay_Bishop's Beach_L_3	Gloiopeltis	0	During	2016	Kachemak Bay	Bishop's Beach	Low	3
Post_2016_Kachemak Bay_Bishop's Beach_L_3	Halosaccion	0	During	2016	Kachemak Bay	Bishop's Beach	Low	3
Post_2016_Kachemak Bay_Bishop's Beach_L_3	Mastocarpus / Mazaella	0	During	2016	Kachemak Bay	Bishop's Beach	Low	3
Post_2016_Kachemak Bay_Bishop's Beach_L_3	Mytilus	0	During	2016	Kachemak Bay	Bishop's Beach	Low	3
Post_2016_Kachemak Bay_Bishop's Beach_L_3	non-coralline algal crust	0	During	2016	Kachemak Bay	Bishop's Beach	Low	3
Post_2016_Kachemak Bay_Bishop's Beach_L_3	Odonthalia / Neorhodomela	0.5	During	2016	Kachemak Bay	Bishop's Beach	Low	3
Post_2016_Kachemak Bay_Bishop's Beach_L_3	Savoiea / Polysiphonia	1	During	2016	Kachemak Bay	Bishop's Beach	Low	3
Post_2016_Kachemak Bay_Bishop's Beach_L_3	Ulva / Monostroma	0	During	2016	Kachemak Bay	Bishop's Beach	Low	3
Post_2016_Kachemak Bay_Bishop's Beach_L_4	Acrosiphonia	0	During	2016	Kachemak Bay	Bishop's Beach	Low	4
Post_2016_Kachemak Bay_Bishop's Beach_L_4	Alaria	0	During	2016	Kachemak Bay	Bishop's Beach	Low	4
Post_2016_Kachemak Bay_Bishop's Beach_L_4	bare substrate	12.5	During	2016	Kachemak Bay	Bishop's Beach	Low	4
Post_2016_Kachemak Bay_Bishop's Beach_L_4	barnacles	0	During	2016	Kachemak Bay	Bishop's Beach	Low	4
Post_2016_Kachemak Bay_Bishop's Beach_L_4	Boreophyllum / Pyropia / Wildemania	0	During	2016	Kachemak Bay	Bishop's Beach	Low	4
Post_2016_Kachemak Bay_Bishop's Beach_L_4	Cladophora / Chaetomorpha	0	During	2016	Kachemak Bay	Bishop's Beach	Low	4
Post_2016_Kachemak Bay_Bishop's Beach_L_4	Cryptosiphonia	0	During	2016	Kachemak Bay	Bishop's Beach	Low	4
Post_2016_Kachemak Bay_Bishop's Beach_L_4	Devaleraea / Palmaria	0	During	2016	Kachemak Bay	Bishop's Beach	Low	4
Post_2016_Kachemak Bay_Bishop's Beach_L_4	encrusting coralline algae	12.5	During	2016	Kachemak Bay	Bishop's Beach	Low	4
Post_2016_Kachemak Bay_Bishop's Beach_L_4	Fucus	5	During	2016	Kachemak Bay	Bishop's Beach	Low	4
Post_2016_Kachemak Bay_Bishop's Beach_L_4	Gloiopeltis	0	During	2016	Kachemak Bay	Bishop's Beach	Low	4
Post_2016_Kachemak Bay_Bishop's Beach_L_4	Halosaccion	0	During	2016	Kachemak Bay	Bishop's Beach	Low	4
Post_2016_Kachemak Bay_Bishop's Beach_L_4	Mastocarpus / Mazaella	0	During	2016	Kachemak Bay	Bishop's Beach	Low	4
Post_2016_Kachemak Bay_Bishop's Beach_L_4	Mytilus	0	During	2016	Kachemak Bay	Bishop's Beach	Low	4
Post_2016_Kachemak Bay_Bishop's Beach_L_4	non-coralline algal crust	0	During	2016	Kachemak Bay	Bishop's Beach	Low	4
Post_2016_Kachemak Bay_Bishop's Beach_L_4	Odonthalia / Neorhodomela	2.5	During	2016	Kachemak Bay	Bishop's Beach	Low	4
Post_2016_Kachemak Bay_Bishop's Beach_L_4	Savoiea / Polysiphonia	2.5	During	2016	Kachemak Bay	Bishop's Beach	Low	4
Post_2016_Kachemak Bay_Bishop's Beach_L_4	Ulva / Monostroma	5	During	2016	Kachemak Bay	Bishop's Beach	Low	4
Post_2016_Kachemak Bay_Bishop's Beach_L_5	Acrosiphonia	1.93548	During	2016	Kachemak Bay	Bishop's Beach	Low	5
Post_2016_Kachemak Bay_Bishop's Beach_L_5	Alaria	3.87097	During	2016	Kachemak Bay	Bishop's Beach	Low	5
Post_2016_Kachemak Bay_Bishop's Beach_L_5	bare substrate	36.7742	During	2016	Kachemak Bay	Bishop's Beach	Low	5
Post_2016_Kachemak Bay_Bishop's Beach_L_5	barnacles	0	During	2016	Kachemak Bay	Bishop's Beach	Low	5
Post_2016_Kachemak Bay_Bishop's Beach_L_5	Boreophyllum / Pyropia / Wildemania	0	During	2016	Kachemak Bay	Bishop's Beach	Low	5
Post_2016_Kachemak Bay_Bishop's Beach_L_5	Cladophora / Chaetomorpha	0	During	2016	Kachemak Bay	Bishop's Beach	Low	5
Post_2016_Kachemak Bay_Bishop's Beach_L_5	Cryptosiphonia	0	During	2016	Kachemak Bay	Bishop's Beach	Low	5
Post_2016_Kachemak Bay_Bishop's Beach_L_5	Devaleraea / Palmaria	1.29032	During	2016	Kachemak Bay	Bishop's Beach	Low	5
Post_2016_Kachemak Bay_Bishop's Beach_L_5	encrusting coralline algae	1.93548	During	2016	Kachemak Bay	Bishop's Beach	Low	5
Post_2016_Kachemak Bay_Bishop's Beach_L_5	Fucus	5.16129	During	2016	Kachemak Bay	Bishop's Beach	Low	5
Post_2016_Kachemak Bay_Bishop's Beach_L_5	Gloiopeltis	0	During	2016	Kachemak Bay	Bishop's Beach	Low	5
Post_2016_Kachemak Bay_Bishop's Beach_L_5	Halosaccion	0	During	2016	Kachemak Bay	Bishop's Beach	Low	5
Post_2016_Kachemak Bay_Bishop's Beach_L_5	Mastocarpus / Mazaella	0	During	2016	Kachemak Bay	Bishop's Beach	Low	5
Post_2016_Kachemak Bay_Bishop's Beach_L_5	Mytilus	0	During	2016	Kachemak Bay	Bishop's Beach	Low	5
Post_2016_Kachemak Bay_Bishop's Beach_L_5	non-coralline algal crust	0	During	2016	Kachemak Bay	Bishop's Beach	Low	5
Post_2016_Kachemak Bay_Bishop's Beach_L_5	Odonthalia / Neorhodomela	0	During	2016	Kachemak Bay	Bishop's Beach	Low	5
Post_2016_Kachemak Bay_Bishop's Beach_L_5	Savoiea / Polysiphonia	9.67742	During	2016	Kachemak Bay	Bishop's Beach	Low	5
Post_2016_Kachemak Bay_Bishop's Beach_L_5	Ulva / Monostroma	3.22581	During	2016	Kachemak Bay	Bishop's Beach	Low	5
Post_2016_Kachemak Bay_Bishop's Beach_L_6	Acrosiphonia	4.54545	During	2016	Kachemak Bay	Bishop's Beach	Low	6
Post_2016_Kachemak Bay_Bishop's Beach_L_6	Alaria	9.09091	During	2016	Kachemak Bay	Bishop's Beach	Low	6
Post_2016_Kachemak Bay_Bishop's Beach_L_6	bare substrate	42.7273	During	2016	Kachemak Bay	Bishop's Beach	Low	6
Post_2016_Kachemak Bay_Bishop's Beach_L_6	barnacles	0	During	2016	Kachemak Bay	Bishop's Beach	Low	6
Post_2016_Kachemak Bay_Bishop's Beach_L_6	Boreophyllum / Pyropia / Wildemania	1.81818	During	2016	Kachemak Bay	Bishop's Beach	Low	6
Post_2016_Kachemak Bay_Bishop's Beach_L_6	Cladophora / Chaetomorpha	0	During	2016	Kachemak Bay	Bishop's Beach	Low	6
Post_2016_Kachemak Bay_Bishop's Beach_L_6	Cryptosiphonia	0	During	2016	Kachemak Bay	Bishop's Beach	Low	6
Post_2016_Kachemak Bay_Bishop's Beach_L_6	Devaleraea / Palmaria	0	During	2016	Kachemak Bay	Bishop's Beach	Low	6
Post_2016_Kachemak Bay_Bishop's Beach_L_6	encrusting coralline algae	18.1818	During	2016	Kachemak Bay	Bishop's Beach	Low	6
Post_2016_Kachemak Bay_Bishop's Beach_L_6	Fucus	0	During	2016	Kachemak Bay	Bishop's Beach	Low	6
Post_2016_Kachemak Bay_Bishop's Beach_L_6	Gloiopeltis	0	During	2016	Kachemak Bay	Bishop's Beach	Low	6
Post_2016_Kachemak Bay_Bishop's Beach_L_6	Halosaccion	0	During	2016	Kachemak Bay	Bishop's Beach	Low	6
Post_2016_Kachemak Bay_Bishop's Beach_L_6	Mastocarpus / Mazaella	0	During	2016	Kachemak Bay	Bishop's Beach	Low	6
Post_2016_Kachemak Bay_Bishop's Beach_L_6	Mytilus	0	During	2016	Kachemak Bay	Bishop's Beach	Low	6
Post_2016_Kachemak Bay_Bishop's Beach_L_6	non-coralline algal crust	0	During	2016	Kachemak Bay	Bishop's Beach	Low	6
Post_2016_Kachemak Bay_Bishop's Beach_L_6	Odonthalia / Neorhodomela	0	During	2016	Kachemak Bay	Bishop's Beach	Low	6
Post_2016_Kachemak Bay_Bishop's Beach_L_6	Savoiea / Polysiphonia	11.8182	During	2016	Kachemak Bay	Bishop's Beach	Low	6
Post_2016_Kachemak Bay_Bishop's Beach_L_6	Ulva / Monostroma	9.09091	During	2016	Kachemak Bay	Bishop's Beach	Low	6
Post_2016_Kachemak Bay_Bishop's Beach_L_7	Acrosiphonia	0	During	2016	Kachemak Bay	Bishop's Beach	Low	7
Post_2016_Kachemak Bay_Bishop's Beach_L_7	Alaria	0	During	2016	Kachemak Bay	Bishop's Beach	Low	7
Post_2016_Kachemak Bay_Bishop's Beach_L_7	bare substrate	25	During	2016	Kachemak Bay	Bishop's Beach	Low	7
Post_2016_Kachemak Bay_Bishop's Beach_L_7	barnacles	0	During	2016	Kachemak Bay	Bishop's Beach	Low	7
Post_2016_Kachemak Bay_Bishop's Beach_L_7	Boreophyllum / Pyropia / Wildemania	0	During	2016	Kachemak Bay	Bishop's Beach	Low	7
Post_2016_Kachemak Bay_Bishop's Beach_L_7	Cladophora / Chaetomorpha	0	During	2016	Kachemak Bay	Bishop's Beach	Low	7
Post_2016_Kachemak Bay_Bishop's Beach_L_7	Cryptosiphonia	0	During	2016	Kachemak Bay	Bishop's Beach	Low	7
Post_2016_Kachemak Bay_Bishop's Beach_L_7	Devaleraea / Palmaria	0	During	2016	Kachemak Bay	Bishop's Beach	Low	7
Post_2016_Kachemak Bay_Bishop's Beach_L_7	encrusting coralline algae	10	During	2016	Kachemak Bay	Bishop's Beach	Low	7
Post_2016_Kachemak Bay_Bishop's Beach_L_7	Fucus	0	During	2016	Kachemak Bay	Bishop's Beach	Low	7
Post_2016_Kachemak Bay_Bishop's Beach_L_7	Gloiopeltis	0	During	2016	Kachemak Bay	Bishop's Beach	Low	7
Post_2016_Kachemak Bay_Bishop's Beach_L_7	Halosaccion	0	During	2016	Kachemak Bay	Bishop's Beach	Low	7
Post_2016_Kachemak Bay_Bishop's Beach_L_7	Mastocarpus / Mazaella	0	During	2016	Kachemak Bay	Bishop's Beach	Low	7
Post_2016_Kachemak Bay_Bishop's Beach_L_7	Mytilus	0	During	2016	Kachemak Bay	Bishop's Beach	Low	7
Post_2016_Kachemak Bay_Bishop's Beach_L_7	non-coralline algal crust	0	During	2016	Kachemak Bay	Bishop's Beach	Low	7
Post_2016_Kachemak Bay_Bishop's Beach_L_7	Odonthalia / Neorhodomela	0	During	2016	Kachemak Bay	Bishop's Beach	Low	7
Post_2016_Kachemak Bay_Bishop's Beach_L_7	Savoiea / Polysiphonia	5	During	2016	Kachemak Bay	Bishop's Beach	Low	7
Post_2016_Kachemak Bay_Bishop's Beach_L_7	Ulva / Monostroma	5	During	2016	Kachemak Bay	Bishop's Beach	Low	7
Post_2016_Kachemak Bay_Bishop's Beach_L_8	Acrosiphonia	2.5	During	2016	Kachemak Bay	Bishop's Beach	Low	8
Post_2016_Kachemak Bay_Bishop's Beach_L_8	Alaria	5.5	During	2016	Kachemak Bay	Bishop's Beach	Low	8
Post_2016_Kachemak Bay_Bishop's Beach_L_8	bare substrate	23.5	During	2016	Kachemak Bay	Bishop's Beach	Low	8
Post_2016_Kachemak Bay_Bishop's Beach_L_8	barnacles	0	During	2016	Kachemak Bay	Bishop's Beach	Low	8
Post_2016_Kachemak Bay_Bishop's Beach_L_8	Boreophyllum / Pyropia / Wildemania	0	During	2016	Kachemak Bay	Bishop's Beach	Low	8
Post_2016_Kachemak Bay_Bishop's Beach_L_8	Cladophora / Chaetomorpha	0	During	2016	Kachemak Bay	Bishop's Beach	Low	8
Post_2016_Kachemak Bay_Bishop's Beach_L_8	Cryptosiphonia	0	During	2016	Kachemak Bay	Bishop's Beach	Low	8
Post_2016_Kachemak Bay_Bishop's Beach_L_8	Devaleraea / Palmaria	0	During	2016	Kachemak Bay	Bishop's Beach	Low	8
Post_2016_Kachemak Bay_Bishop's Beach_L_8	encrusting coralline algae	5	During	2016	Kachemak Bay	Bishop's Beach	Low	8
Post_2016_Kachemak Bay_Bishop's Beach_L_8	Fucus	0	During	2016	Kachemak Bay	Bishop's Beach	Low	8
Post_2016_Kachemak Bay_Bishop's Beach_L_8	Gloiopeltis	0	During	2016	Kachemak Bay	Bishop's Beach	Low	8
Post_2016_Kachemak Bay_Bishop's Beach_L_8	Halosaccion	0	During	2016	Kachemak Bay	Bishop's Beach	Low	8
Post_2016_Kachemak Bay_Bishop's Beach_L_8	Mastocarpus / Mazaella	0	During	2016	Kachemak Bay	Bishop's Beach	Low	8
Post_2016_Kachemak Bay_Bishop's Beach_L_8	Mytilus	0	During	2016	Kachemak Bay	Bishop's Beach	Low	8
Post_2016_Kachemak Bay_Bishop's Beach_L_8	non-coralline algal crust	0	During	2016	Kachemak Bay	Bishop's Beach	Low	8
Post_2016_Kachemak Bay_Bishop's Beach_L_8	Odonthalia / Neorhodomela	2.5	During	2016	Kachemak Bay	Bishop's Beach	Low	8
Post_2016_Kachemak Bay_Bishop's Beach_L_8	Savoiea / Polysiphonia	10	During	2016	Kachemak Bay	Bishop's Beach	Low	8
Post_2016_Kachemak Bay_Bishop's Beach_L_8	Ulva / Monostroma	3.5	During	2016	Kachemak Bay	Bishop's Beach	Low	8
Post_2016_Kachemak Bay_Bishop's Beach_L_9	Acrosiphonia	7.69231	During	2016	Kachemak Bay	Bishop's Beach	Low	9
Post_2016_Kachemak Bay_Bishop's Beach_L_9	Alaria	0	During	2016	Kachemak Bay	Bishop's Beach	Low	9
Post_2016_Kachemak Bay_Bishop's Beach_L_9	bare substrate	24.6154	During	2016	Kachemak Bay	Bishop's Beach	Low	9
Post_2016_Kachemak Bay_Bishop's Beach_L_9	barnacles	0	During	2016	Kachemak Bay	Bishop's Beach	Low	9
Post_2016_Kachemak Bay_Bishop's Beach_L_9	Boreophyllum / Pyropia / Wildemania	3.84615	During	2016	Kachemak Bay	Bishop's Beach	Low	9
Post_2016_Kachemak Bay_Bishop's Beach_L_9	Cladophora / Chaetomorpha	0	During	2016	Kachemak Bay	Bishop's Beach	Low	9
Post_2016_Kachemak Bay_Bishop's Beach_L_9	Cryptosiphonia	0	During	2016	Kachemak Bay	Bishop's Beach	Low	9
Post_2016_Kachemak Bay_Bishop's Beach_L_9	Devaleraea / Palmaria	0	During	2016	Kachemak Bay	Bishop's Beach	Low	9
Post_2016_Kachemak Bay_Bishop's Beach_L_9	encrusting coralline algae	0	During	2016	Kachemak Bay	Bishop's Beach	Low	9
Post_2016_Kachemak Bay_Bishop's Beach_L_9	Fucus	7.69231	During	2016	Kachemak Bay	Bishop's Beach	Low	9
Post_2016_Kachemak Bay_Bishop's Beach_L_9	Gloiopeltis	0	During	2016	Kachemak Bay	Bishop's Beach	Low	9
Post_2016_Kachemak Bay_Bishop's Beach_L_9	Halosaccion	0	During	2016	Kachemak Bay	Bishop's Beach	Low	9
Post_2016_Kachemak Bay_Bishop's Beach_L_9	Mastocarpus / Mazaella	0	During	2016	Kachemak Bay	Bishop's Beach	Low	9
Post_2016_Kachemak Bay_Bishop's Beach_L_9	Mytilus	0	During	2016	Kachemak Bay	Bishop's Beach	Low	9
Post_2016_Kachemak Bay_Bishop's Beach_L_9	non-coralline algal crust	0	During	2016	Kachemak Bay	Bishop's Beach	Low	9
Post_2016_Kachemak Bay_Bishop's Beach_L_9	Odonthalia / Neorhodomela	0	During	2016	Kachemak Bay	Bishop's Beach	Low	9
Post_2016_Kachemak Bay_Bishop's Beach_L_9	Savoiea / Polysiphonia	15.3846	During	2016	Kachemak Bay	Bishop's Beach	Low	9
Post_2016_Kachemak Bay_Bishop's Beach_L_9	Ulva / Monostroma	11.5385	During	2016	Kachemak Bay	Bishop's Beach	Low	9
Post_2016_Kachemak Bay_Bishop's Beach_L_10	Acrosiphonia	0	During	2016	Kachemak Bay	Bishop's Beach	Low	10
Post_2016_Kachemak Bay_Bishop's Beach_L_10	Alaria	0	During	2016	Kachemak Bay	Bishop's Beach	Low	10
Post_2016_Kachemak Bay_Bishop's Beach_L_10	bare substrate	49	During	2016	Kachemak Bay	Bishop's Beach	Low	10
Post_2016_Kachemak Bay_Bishop's Beach_L_10	barnacles	0	During	2016	Kachemak Bay	Bishop's Beach	Low	10
Post_2016_Kachemak Bay_Bishop's Beach_L_10	Boreophyllum / Pyropia / Wildemania	1	During	2016	Kachemak Bay	Bishop's Beach	Low	10
Post_2016_Kachemak Bay_Bishop's Beach_L_10	Cladophora / Chaetomorpha	0	During	2016	Kachemak Bay	Bishop's Beach	Low	10
Post_2016_Kachemak Bay_Bishop's Beach_L_10	Cryptosiphonia	0	During	2016	Kachemak Bay	Bishop's Beach	Low	10
Post_2016_Kachemak Bay_Bishop's Beach_L_10	Devaleraea / Palmaria	5	During	2016	Kachemak Bay	Bishop's Beach	Low	10
Post_2016_Kachemak Bay_Bishop's Beach_L_10	encrusting coralline algae	10	During	2016	Kachemak Bay	Bishop's Beach	Low	10
Post_2016_Kachemak Bay_Bishop's Beach_L_10	Fucus	0	During	2016	Kachemak Bay	Bishop's Beach	Low	10
Post_2016_Kachemak Bay_Bishop's Beach_L_10	Gloiopeltis	0	During	2016	Kachemak Bay	Bishop's Beach	Low	10
Post_2016_Kachemak Bay_Bishop's Beach_L_10	Halosaccion	0	During	2016	Kachemak Bay	Bishop's Beach	Low	10
Post_2016_Kachemak Bay_Bishop's Beach_L_10	Mastocarpus / Mazaella	0	During	2016	Kachemak Bay	Bishop's Beach	Low	10
Post_2016_Kachemak Bay_Bishop's Beach_L_10	Mytilus	0	During	2016	Kachemak Bay	Bishop's Beach	Low	10
Post_2016_Kachemak Bay_Bishop's Beach_L_10	non-coralline algal crust	0	During	2016	Kachemak Bay	Bishop's Beach	Low	10
Post_2016_Kachemak Bay_Bishop's Beach_L_10	Odonthalia / Neorhodomela	4	During	2016	Kachemak Bay	Bishop's Beach	Low	10
Post_2016_Kachemak Bay_Bishop's Beach_L_10	Savoiea / Polysiphonia	5	During	2016	Kachemak Bay	Bishop's Beach	Low	10
Post_2016_Kachemak Bay_Bishop's Beach_L_10	Ulva / Monostroma	15	During	2016	Kachemak Bay	Bishop's Beach	Low	10
Post_2017_Kachemak Bay_Bishop's Beach_L_1	Acrosiphonia	6.95652	During	2017	Kachemak Bay	Bishop's Beach	Low	1
Post_2017_Kachemak Bay_Bishop's Beach_L_1	Alaria	10.4348	During	2017	Kachemak Bay	Bishop's Beach	Low	1
Post_2017_Kachemak Bay_Bishop's Beach_L_1	bare substrate	45.2174	During	2017	Kachemak Bay	Bishop's Beach	Low	1
Post_2017_Kachemak Bay_Bishop's Beach_L_1	barnacles	0	During	2017	Kachemak Bay	Bishop's Beach	Low	1
Post_2017_Kachemak Bay_Bishop's Beach_L_1	Boreophyllum / Pyropia / Wildemania	0	During	2017	Kachemak Bay	Bishop's Beach	Low	1
Post_2017_Kachemak Bay_Bishop's Beach_L_1	Cladophora / Chaetomorpha	0	During	2017	Kachemak Bay	Bishop's Beach	Low	1
Post_2017_Kachemak Bay_Bishop's Beach_L_1	Cryptosiphonia	0	During	2017	Kachemak Bay	Bishop's Beach	Low	1
Post_2017_Kachemak Bay_Bishop's Beach_L_1	Devaleraea / Palmaria	2.6087	During	2017	Kachemak Bay	Bishop's Beach	Low	1
Post_2017_Kachemak Bay_Bishop's Beach_L_1	encrusting coralline algae	1.73913	During	2017	Kachemak Bay	Bishop's Beach	Low	1
Post_2017_Kachemak Bay_Bishop's Beach_L_1	Fucus	17.3913	During	2017	Kachemak Bay	Bishop's Beach	Low	1
Post_2017_Kachemak Bay_Bishop's Beach_L_1	Gloiopeltis	0	During	2017	Kachemak Bay	Bishop's Beach	Low	1
Post_2017_Kachemak Bay_Bishop's Beach_L_1	Halosaccion	0	During	2017	Kachemak Bay	Bishop's Beach	Low	1
Post_2017_Kachemak Bay_Bishop's Beach_L_1	Mastocarpus / Mazaella	0	During	2017	Kachemak Bay	Bishop's Beach	Low	1
Post_2017_Kachemak Bay_Bishop's Beach_L_1	Mytilus	0	During	2017	Kachemak Bay	Bishop's Beach	Low	1
Post_2017_Kachemak Bay_Bishop's Beach_L_1	non-coralline algal crust	0	During	2017	Kachemak Bay	Bishop's Beach	Low	1
Post_2017_Kachemak Bay_Bishop's Beach_L_1	Odonthalia / Neorhodomela	0	During	2017	Kachemak Bay	Bishop's Beach	Low	1
Post_2017_Kachemak Bay_Bishop's Beach_L_1	Savoiea / Polysiphonia	6.08696	During	2017	Kachemak Bay	Bishop's Beach	Low	1
Post_2017_Kachemak Bay_Bishop's Beach_L_1	Ulva / Monostroma	0.869565	During	2017	Kachemak Bay	Bishop's Beach	Low	1
Post_2017_Kachemak Bay_Bishop's Beach_L_2	Acrosiphonia	0	During	2017	Kachemak Bay	Bishop's Beach	Low	2
Post_2017_Kachemak Bay_Bishop's Beach_L_2	Alaria	1	During	2017	Kachemak Bay	Bishop's Beach	Low	2
Post_2017_Kachemak Bay_Bishop's Beach_L_2	bare substrate	74	During	2017	Kachemak Bay	Bishop's Beach	Low	2
Post_2017_Kachemak Bay_Bishop's Beach_L_2	barnacles	0	During	2017	Kachemak Bay	Bishop's Beach	Low	2
Post_2017_Kachemak Bay_Bishop's Beach_L_2	Boreophyllum / Pyropia / Wildemania	0	During	2017	Kachemak Bay	Bishop's Beach	Low	2
Post_2017_Kachemak Bay_Bishop's Beach_L_2	Cladophora / Chaetomorpha	0	During	2017	Kachemak Bay	Bishop's Beach	Low	2
Post_2017_Kachemak Bay_Bishop's Beach_L_2	Cryptosiphonia	0	During	2017	Kachemak Bay	Bishop's Beach	Low	2
Post_2017_Kachemak Bay_Bishop's Beach_L_2	Devaleraea / Palmaria	0	During	2017	Kachemak Bay	Bishop's Beach	Low	2
Post_2017_Kachemak Bay_Bishop's Beach_L_2	encrusting coralline algae	20	During	2017	Kachemak Bay	Bishop's Beach	Low	2
Post_2017_Kachemak Bay_Bishop's Beach_L_2	Fucus	0	During	2017	Kachemak Bay	Bishop's Beach	Low	2
Post_2017_Kachemak Bay_Bishop's Beach_L_2	Gloiopeltis	0	During	2017	Kachemak Bay	Bishop's Beach	Low	2
Post_2017_Kachemak Bay_Bishop's Beach_L_2	Halosaccion	0	During	2017	Kachemak Bay	Bishop's Beach	Low	2
Post_2017_Kachemak Bay_Bishop's Beach_L_2	Mastocarpus / Mazaella	0	During	2017	Kachemak Bay	Bishop's Beach	Low	2
Post_2017_Kachemak Bay_Bishop's Beach_L_2	Mytilus	0	During	2017	Kachemak Bay	Bishop's Beach	Low	2
Post_2017_Kachemak Bay_Bishop's Beach_L_2	non-coralline algal crust	0	During	2017	Kachemak Bay	Bishop's Beach	Low	2
Post_2017_Kachemak Bay_Bishop's Beach_L_2	Odonthalia / Neorhodomela	0	During	2017	Kachemak Bay	Bishop's Beach	Low	2
Post_2017_Kachemak Bay_Bishop's Beach_L_2	Savoiea / Polysiphonia	0	During	2017	Kachemak Bay	Bishop's Beach	Low	2
Post_2017_Kachemak Bay_Bishop's Beach_L_2	Ulva / Monostroma	0	During	2017	Kachemak Bay	Bishop's Beach	Low	2
Post_2017_Kachemak Bay_Bishop's Beach_L_3	Acrosiphonia	1.6	During	2017	Kachemak Bay	Bishop's Beach	Low	3
Post_2017_Kachemak Bay_Bishop's Beach_L_3	Alaria	8.8	During	2017	Kachemak Bay	Bishop's Beach	Low	3
Post_2017_Kachemak Bay_Bishop's Beach_L_3	bare substrate	52.8	During	2017	Kachemak Bay	Bishop's Beach	Low	3
Post_2017_Kachemak Bay_Bishop's Beach_L_3	barnacles	0	During	2017	Kachemak Bay	Bishop's Beach	Low	3
Post_2017_Kachemak Bay_Bishop's Beach_L_3	Boreophyllum / Pyropia / Wildemania	0	During	2017	Kachemak Bay	Bishop's Beach	Low	3
Post_2017_Kachemak Bay_Bishop's Beach_L_3	Cladophora / Chaetomorpha	0	During	2017	Kachemak Bay	Bishop's Beach	Low	3
Post_2017_Kachemak Bay_Bishop's Beach_L_3	Cryptosiphonia	0	During	2017	Kachemak Bay	Bishop's Beach	Low	3
Post_2017_Kachemak Bay_Bishop's Beach_L_3	Devaleraea / Palmaria	0	During	2017	Kachemak Bay	Bishop's Beach	Low	3
Post_2017_Kachemak Bay_Bishop's Beach_L_3	encrusting coralline algae	16	During	2017	Kachemak Bay	Bishop's Beach	Low	3
Post_2017_Kachemak Bay_Bishop's Beach_L_3	Fucus	0	During	2017	Kachemak Bay	Bishop's Beach	Low	3
Post_2017_Kachemak Bay_Bishop's Beach_L_3	Gloiopeltis	0	During	2017	Kachemak Bay	Bishop's Beach	Low	3
Post_2017_Kachemak Bay_Bishop's Beach_L_3	Halosaccion	0	During	2017	Kachemak Bay	Bishop's Beach	Low	3
Post_2017_Kachemak Bay_Bishop's Beach_L_3	Mastocarpus / Mazaella	0	During	2017	Kachemak Bay	Bishop's Beach	Low	3
Post_2017_Kachemak Bay_Bishop's Beach_L_3	Mytilus	0	During	2017	Kachemak Bay	Bishop's Beach	Low	3
Post_2017_Kachemak Bay_Bishop's Beach_L_3	non-coralline algal crust	0	During	2017	Kachemak Bay	Bishop's Beach	Low	3
Post_2017_Kachemak Bay_Bishop's Beach_L_3	Odonthalia / Neorhodomela	0	During	2017	Kachemak Bay	Bishop's Beach	Low	3
Post_2017_Kachemak Bay_Bishop's Beach_L_3	Savoiea / Polysiphonia	0	During	2017	Kachemak Bay	Bishop's Beach	Low	3
Post_2017_Kachemak Bay_Bishop's Beach_L_3	Ulva / Monostroma	0.8	During	2017	Kachemak Bay	Bishop's Beach	Low	3
Post_2017_Kachemak Bay_Bishop's Beach_L_4	Acrosiphonia	10.7143	During	2017	Kachemak Bay	Bishop's Beach	Low	4
Post_2017_Kachemak Bay_Bishop's Beach_L_4	Alaria	0	During	2017	Kachemak Bay	Bishop's Beach	Low	4
Post_2017_Kachemak Bay_Bishop's Beach_L_4	bare substrate	28.5714	During	2017	Kachemak Bay	Bishop's Beach	Low	4
Post_2017_Kachemak Bay_Bishop's Beach_L_4	barnacles	0	During	2017	Kachemak Bay	Bishop's Beach	Low	4
Post_2017_Kachemak Bay_Bishop's Beach_L_4	Boreophyllum / Pyropia / Wildemania	0	During	2017	Kachemak Bay	Bishop's Beach	Low	4
Post_2017_Kachemak Bay_Bishop's Beach_L_4	Cladophora / Chaetomorpha	0	During	2017	Kachemak Bay	Bishop's Beach	Low	4
Post_2017_Kachemak Bay_Bishop's Beach_L_4	Cryptosiphonia	0	During	2017	Kachemak Bay	Bishop's Beach	Low	4
Post_2017_Kachemak Bay_Bishop's Beach_L_4	Devaleraea / Palmaria	10.7143	During	2017	Kachemak Bay	Bishop's Beach	Low	4
Post_2017_Kachemak Bay_Bishop's Beach_L_4	encrusting coralline algae	3.57143	During	2017	Kachemak Bay	Bishop's Beach	Low	4
Post_2017_Kachemak Bay_Bishop's Beach_L_4	Fucus	0	During	2017	Kachemak Bay	Bishop's Beach	Low	4
Post_2017_Kachemak Bay_Bishop's Beach_L_4	Gloiopeltis	0	During	2017	Kachemak Bay	Bishop's Beach	Low	4
Post_2017_Kachemak Bay_Bishop's Beach_L_4	Halosaccion	0	During	2017	Kachemak Bay	Bishop's Beach	Low	4
Post_2017_Kachemak Bay_Bishop's Beach_L_4	Mastocarpus / Mazaella	0	During	2017	Kachemak Bay	Bishop's Beach	Low	4
Post_2017_Kachemak Bay_Bishop's Beach_L_4	Mytilus	0	During	2017	Kachemak Bay	Bishop's Beach	Low	4
Post_2017_Kachemak Bay_Bishop's Beach_L_4	non-coralline algal crust	0	During	2017	Kachemak Bay	Bishop's Beach	Low	4
Post_2017_Kachemak Bay_Bishop's Beach_L_4	Odonthalia / Neorhodomela	0	During	2017	Kachemak Bay	Bishop's Beach	Low	4
Post_2017_Kachemak Bay_Bishop's Beach_L_4	Savoiea / Polysiphonia	3.57143	During	2017	Kachemak Bay	Bishop's Beach	Low	4
Post_2017_Kachemak Bay_Bishop's Beach_L_4	Ulva / Monostroma	0	During	2017	Kachemak Bay	Bishop's Beach	Low	4
Post_2017_Kachemak Bay_Bishop's Beach_L_5	Acrosiphonia	0	During	2017	Kachemak Bay	Bishop's Beach	Low	5
Post_2017_Kachemak Bay_Bishop's Beach_L_5	Alaria	0	During	2017	Kachemak Bay	Bishop's Beach	Low	5
Post_2017_Kachemak Bay_Bishop's Beach_L_5	bare substrate	0	During	2017	Kachemak Bay	Bishop's Beach	Low	5
Post_2017_Kachemak Bay_Bishop's Beach_L_5	barnacles	0	During	2017	Kachemak Bay	Bishop's Beach	Low	5
Post_2017_Kachemak Bay_Bishop's Beach_L_5	Boreophyllum / Pyropia / Wildemania	0	During	2017	Kachemak Bay	Bishop's Beach	Low	5
Post_2017_Kachemak Bay_Bishop's Beach_L_5	Cladophora / Chaetomorpha	0	During	2017	Kachemak Bay	Bishop's Beach	Low	5
Post_2017_Kachemak Bay_Bishop's Beach_L_5	Cryptosiphonia	0	During	2017	Kachemak Bay	Bishop's Beach	Low	5
Post_2017_Kachemak Bay_Bishop's Beach_L_5	Devaleraea / Palmaria	0	During	2017	Kachemak Bay	Bishop's Beach	Low	5
Post_2017_Kachemak Bay_Bishop's Beach_L_5	encrusting coralline algae	0	During	2017	Kachemak Bay	Bishop's Beach	Low	5
Post_2017_Kachemak Bay_Bishop's Beach_L_5	Fucus	0	During	2017	Kachemak Bay	Bishop's Beach	Low	5
Post_2017_Kachemak Bay_Bishop's Beach_L_5	Gloiopeltis	0	During	2017	Kachemak Bay	Bishop's Beach	Low	5
Post_2017_Kachemak Bay_Bishop's Beach_L_5	Halosaccion	0	During	2017	Kachemak Bay	Bishop's Beach	Low	5
Post_2017_Kachemak Bay_Bishop's Beach_L_5	Mastocarpus / Mazaella	0	During	2017	Kachemak Bay	Bishop's Beach	Low	5
Post_2017_Kachemak Bay_Bishop's Beach_L_5	Mytilus	0	During	2017	Kachemak Bay	Bishop's Beach	Low	5
Post_2017_Kachemak Bay_Bishop's Beach_L_5	non-coralline algal crust	0	During	2017	Kachemak Bay	Bishop's Beach	Low	5
Post_2017_Kachemak Bay_Bishop's Beach_L_5	Odonthalia / Neorhodomela	0	During	2017	Kachemak Bay	Bishop's Beach	Low	5
Post_2017_Kachemak Bay_Bishop's Beach_L_5	Savoiea / Polysiphonia	0	During	2017	Kachemak Bay	Bishop's Beach	Low	5
Post_2017_Kachemak Bay_Bishop's Beach_L_5	Ulva / Monostroma	0	During	2017	Kachemak Bay	Bishop's Beach	Low	5
Post_2017_Kachemak Bay_Bishop's Beach_L_6	Acrosiphonia	0	During	2017	Kachemak Bay	Bishop's Beach	Low	6
Post_2017_Kachemak Bay_Bishop's Beach_L_6	Alaria	0	During	2017	Kachemak Bay	Bishop's Beach	Low	6
Post_2017_Kachemak Bay_Bishop's Beach_L_6	bare substrate	55	During	2017	Kachemak Bay	Bishop's Beach	Low	6
Post_2017_Kachemak Bay_Bishop's Beach_L_6	barnacles	0	During	2017	Kachemak Bay	Bishop's Beach	Low	6
Post_2017_Kachemak Bay_Bishop's Beach_L_6	Boreophyllum / Pyropia / Wildemania	0	During	2017	Kachemak Bay	Bishop's Beach	Low	6
Post_2017_Kachemak Bay_Bishop's Beach_L_6	Cladophora / Chaetomorpha	0	During	2017	Kachemak Bay	Bishop's Beach	Low	6
Post_2017_Kachemak Bay_Bishop's Beach_L_6	Cryptosiphonia	0	During	2017	Kachemak Bay	Bishop's Beach	Low	6
Post_2017_Kachemak Bay_Bishop's Beach_L_6	Devaleraea / Palmaria	0	During	2017	Kachemak Bay	Bishop's Beach	Low	6
Post_2017_Kachemak Bay_Bishop's Beach_L_6	encrusting coralline algae	15	During	2017	Kachemak Bay	Bishop's Beach	Low	6
Post_2017_Kachemak Bay_Bishop's Beach_L_6	Fucus	0	During	2017	Kachemak Bay	Bishop's Beach	Low	6
Post_2017_Kachemak Bay_Bishop's Beach_L_6	Gloiopeltis	0	During	2017	Kachemak Bay	Bishop's Beach	Low	6
Post_2017_Kachemak Bay_Bishop's Beach_L_6	Halosaccion	0	During	2017	Kachemak Bay	Bishop's Beach	Low	6
Post_2017_Kachemak Bay_Bishop's Beach_L_6	Mastocarpus / Mazaella	0	During	2017	Kachemak Bay	Bishop's Beach	Low	6
Post_2017_Kachemak Bay_Bishop's Beach_L_6	Mytilus	0	During	2017	Kachemak Bay	Bishop's Beach	Low	6
Post_2017_Kachemak Bay_Bishop's Beach_L_6	non-coralline algal crust	0	During	2017	Kachemak Bay	Bishop's Beach	Low	6
Post_2017_Kachemak Bay_Bishop's Beach_L_6	Odonthalia / Neorhodomela	0	During	2017	Kachemak Bay	Bishop's Beach	Low	6
Post_2017_Kachemak Bay_Bishop's Beach_L_6	Savoiea / Polysiphonia	0	During	2017	Kachemak Bay	Bishop's Beach	Low	6
Post_2017_Kachemak Bay_Bishop's Beach_L_6	Ulva / Monostroma	0	During	2017	Kachemak Bay	Bishop's Beach	Low	6
Post_2017_Kachemak Bay_Bishop's Beach_L_7	Acrosiphonia	0	During	2017	Kachemak Bay	Bishop's Beach	Low	7
Post_2017_Kachemak Bay_Bishop's Beach_L_7	Alaria	0	During	2017	Kachemak Bay	Bishop's Beach	Low	7
Post_2017_Kachemak Bay_Bishop's Beach_L_7	bare substrate	29	During	2017	Kachemak Bay	Bishop's Beach	Low	7
Post_2017_Kachemak Bay_Bishop's Beach_L_7	barnacles	0	During	2017	Kachemak Bay	Bishop's Beach	Low	7
Post_2017_Kachemak Bay_Bishop's Beach_L_7	Boreophyllum / Pyropia / Wildemania	0	During	2017	Kachemak Bay	Bishop's Beach	Low	7
Post_2017_Kachemak Bay_Bishop's Beach_L_7	Cladophora / Chaetomorpha	0	During	2017	Kachemak Bay	Bishop's Beach	Low	7
Post_2017_Kachemak Bay_Bishop's Beach_L_7	Cryptosiphonia	0	During	2017	Kachemak Bay	Bishop's Beach	Low	7
Post_2017_Kachemak Bay_Bishop's Beach_L_7	Devaleraea / Palmaria	15	During	2017	Kachemak Bay	Bishop's Beach	Low	7
Post_2017_Kachemak Bay_Bishop's Beach_L_7	encrusting coralline algae	2	During	2017	Kachemak Bay	Bishop's Beach	Low	7
Post_2017_Kachemak Bay_Bishop's Beach_L_7	Fucus	0	During	2017	Kachemak Bay	Bishop's Beach	Low	7
Post_2017_Kachemak Bay_Bishop's Beach_L_7	Gloiopeltis	0	During	2017	Kachemak Bay	Bishop's Beach	Low	7
Post_2017_Kachemak Bay_Bishop's Beach_L_7	Halosaccion	0	During	2017	Kachemak Bay	Bishop's Beach	Low	7
Post_2017_Kachemak Bay_Bishop's Beach_L_7	Mastocarpus / Mazaella	1	During	2017	Kachemak Bay	Bishop's Beach	Low	7
Post_2017_Kachemak Bay_Bishop's Beach_L_7	Mytilus	0	During	2017	Kachemak Bay	Bishop's Beach	Low	7
Post_2017_Kachemak Bay_Bishop's Beach_L_7	non-coralline algal crust	0	During	2017	Kachemak Bay	Bishop's Beach	Low	7
Post_2017_Kachemak Bay_Bishop's Beach_L_7	Odonthalia / Neorhodomela	0	During	2017	Kachemak Bay	Bishop's Beach	Low	7
Post_2017_Kachemak Bay_Bishop's Beach_L_7	Savoiea / Polysiphonia	0	During	2017	Kachemak Bay	Bishop's Beach	Low	7
Post_2017_Kachemak Bay_Bishop's Beach_L_7	Ulva / Monostroma	1	During	2017	Kachemak Bay	Bishop's Beach	Low	7
Post_2017_Kachemak Bay_Bishop's Beach_L_8	Acrosiphonia	1	During	2017	Kachemak Bay	Bishop's Beach	Low	8
Post_2017_Kachemak Bay_Bishop's Beach_L_8	Alaria	0	During	2017	Kachemak Bay	Bishop's Beach	Low	8
Post_2017_Kachemak Bay_Bishop's Beach_L_8	bare substrate	58	During	2017	Kachemak Bay	Bishop's Beach	Low	8
Post_2017_Kachemak Bay_Bishop's Beach_L_8	barnacles	0	During	2017	Kachemak Bay	Bishop's Beach	Low	8
Post_2017_Kachemak Bay_Bishop's Beach_L_8	Boreophyllum / Pyropia / Wildemania	0	During	2017	Kachemak Bay	Bishop's Beach	Low	8
Post_2017_Kachemak Bay_Bishop's Beach_L_8	Cladophora / Chaetomorpha	0	During	2017	Kachemak Bay	Bishop's Beach	Low	8
Post_2017_Kachemak Bay_Bishop's Beach_L_8	Cryptosiphonia	0	During	2017	Kachemak Bay	Bishop's Beach	Low	8
Post_2017_Kachemak Bay_Bishop's Beach_L_8	Devaleraea / Palmaria	0	During	2017	Kachemak Bay	Bishop's Beach	Low	8
Post_2017_Kachemak Bay_Bishop's Beach_L_8	encrusting coralline algae	1	During	2017	Kachemak Bay	Bishop's Beach	Low	8
Post_2017_Kachemak Bay_Bishop's Beach_L_8	Fucus	0	During	2017	Kachemak Bay	Bishop's Beach	Low	8
Post_2017_Kachemak Bay_Bishop's Beach_L_8	Gloiopeltis	0	During	2017	Kachemak Bay	Bishop's Beach	Low	8
Post_2017_Kachemak Bay_Bishop's Beach_L_8	Halosaccion	0	During	2017	Kachemak Bay	Bishop's Beach	Low	8
Post_2017_Kachemak Bay_Bishop's Beach_L_8	Mastocarpus / Mazaella	0	During	2017	Kachemak Bay	Bishop's Beach	Low	8
Post_2017_Kachemak Bay_Bishop's Beach_L_8	Mytilus	0	During	2017	Kachemak Bay	Bishop's Beach	Low	8
Post_2017_Kachemak Bay_Bishop's Beach_L_8	non-coralline algal crust	0	During	2017	Kachemak Bay	Bishop's Beach	Low	8
Post_2017_Kachemak Bay_Bishop's Beach_L_8	Odonthalia / Neorhodomela	0	During	2017	Kachemak Bay	Bishop's Beach	Low	8
Post_2017_Kachemak Bay_Bishop's Beach_L_8	Savoiea / Polysiphonia	0	During	2017	Kachemak Bay	Bishop's Beach	Low	8
Post_2017_Kachemak Bay_Bishop's Beach_L_8	Ulva / Monostroma	1	During	2017	Kachemak Bay	Bishop's Beach	Low	8
Post_2017_Kachemak Bay_Bishop's Beach_L_9	Acrosiphonia	5	During	2017	Kachemak Bay	Bishop's Beach	Low	9
Post_2017_Kachemak Bay_Bishop's Beach_L_9	Alaria	0	During	2017	Kachemak Bay	Bishop's Beach	Low	9
Post_2017_Kachemak Bay_Bishop's Beach_L_9	bare substrate	44	During	2017	Kachemak Bay	Bishop's Beach	Low	9
Post_2017_Kachemak Bay_Bishop's Beach_L_9	barnacles	0	During	2017	Kachemak Bay	Bishop's Beach	Low	9
Post_2017_Kachemak Bay_Bishop's Beach_L_9	Boreophyllum / Pyropia / Wildemania	0	During	2017	Kachemak Bay	Bishop's Beach	Low	9
Post_2017_Kachemak Bay_Bishop's Beach_L_9	Cladophora / Chaetomorpha	0	During	2017	Kachemak Bay	Bishop's Beach	Low	9
Post_2017_Kachemak Bay_Bishop's Beach_L_9	Cryptosiphonia	0	During	2017	Kachemak Bay	Bishop's Beach	Low	9
Post_2017_Kachemak Bay_Bishop's Beach_L_9	Devaleraea / Palmaria	2	During	2017	Kachemak Bay	Bishop's Beach	Low	9
Post_2017_Kachemak Bay_Bishop's Beach_L_9	encrusting coralline algae	8	During	2017	Kachemak Bay	Bishop's Beach	Low	9
Post_2017_Kachemak Bay_Bishop's Beach_L_9	Fucus	0	During	2017	Kachemak Bay	Bishop's Beach	Low	9
Post_2017_Kachemak Bay_Bishop's Beach_L_9	Gloiopeltis	0	During	2017	Kachemak Bay	Bishop's Beach	Low	9
Post_2017_Kachemak Bay_Bishop's Beach_L_9	Halosaccion	0	During	2017	Kachemak Bay	Bishop's Beach	Low	9
Post_2017_Kachemak Bay_Bishop's Beach_L_9	Mastocarpus / Mazaella	0	During	2017	Kachemak Bay	Bishop's Beach	Low	9
Post_2017_Kachemak Bay_Bishop's Beach_L_9	Mytilus	0	During	2017	Kachemak Bay	Bishop's Beach	Low	9
Post_2017_Kachemak Bay_Bishop's Beach_L_9	non-coralline algal crust	0	During	2017	Kachemak Bay	Bishop's Beach	Low	9
Post_2017_Kachemak Bay_Bishop's Beach_L_9	Odonthalia / Neorhodomela	0	During	2017	Kachemak Bay	Bishop's Beach	Low	9
Post_2017_Kachemak Bay_Bishop's Beach_L_9	Savoiea / Polysiphonia	1	During	2017	Kachemak Bay	Bishop's Beach	Low	9
Post_2017_Kachemak Bay_Bishop's Beach_L_9	Ulva / Monostroma	0	During	2017	Kachemak Bay	Bishop's Beach	Low	9
Post_2017_Kachemak Bay_Bishop's Beach_L_10	Acrosiphonia	3.57143	During	2017	Kachemak Bay	Bishop's Beach	Low	10
Post_2017_Kachemak Bay_Bishop's Beach_L_10	Alaria	25	During	2017	Kachemak Bay	Bishop's Beach	Low	10
Post_2017_Kachemak Bay_Bishop's Beach_L_10	bare substrate	50	During	2017	Kachemak Bay	Bishop's Beach	Low	10
Post_2017_Kachemak Bay_Bishop's Beach_L_10	barnacles	0	During	2017	Kachemak Bay	Bishop's Beach	Low	10
Post_2017_Kachemak Bay_Bishop's Beach_L_10	Boreophyllum / Pyropia / Wildemania	0	During	2017	Kachemak Bay	Bishop's Beach	Low	10
Post_2017_Kachemak Bay_Bishop's Beach_L_10	Cladophora / Chaetomorpha	0	During	2017	Kachemak Bay	Bishop's Beach	Low	10
Post_2017_Kachemak Bay_Bishop's Beach_L_10	Cryptosiphonia	0	During	2017	Kachemak Bay	Bishop's Beach	Low	10
Post_2017_Kachemak Bay_Bishop's Beach_L_10	Devaleraea / Palmaria	9.28571	During	2017	Kachemak Bay	Bishop's Beach	Low	10
Post_2017_Kachemak Bay_Bishop's Beach_L_10	encrusting coralline algae	0.714286	During	2017	Kachemak Bay	Bishop's Beach	Low	10
Post_2017_Kachemak Bay_Bishop's Beach_L_10	Fucus	0	During	2017	Kachemak Bay	Bishop's Beach	Low	10
Post_2017_Kachemak Bay_Bishop's Beach_L_10	Gloiopeltis	0	During	2017	Kachemak Bay	Bishop's Beach	Low	10
Post_2017_Kachemak Bay_Bishop's Beach_L_10	Halosaccion	0	During	2017	Kachemak Bay	Bishop's Beach	Low	10
Post_2017_Kachemak Bay_Bishop's Beach_L_10	Mastocarpus / Mazaella	0	During	2017	Kachemak Bay	Bishop's Beach	Low	10
Post_2017_Kachemak Bay_Bishop's Beach_L_10	Mytilus	0	During	2017	Kachemak Bay	Bishop's Beach	Low	10
Post_2017_Kachemak Bay_Bishop's Beach_L_10	non-coralline algal crust	0	During	2017	Kachemak Bay	Bishop's Beach	Low	10
Post_2017_Kachemak Bay_Bishop's Beach_L_10	Odonthalia / Neorhodomela	0	During	2017	Kachemak Bay	Bishop's Beach	Low	10
Post_2017_Kachemak Bay_Bishop's Beach_L_10	Savoiea / Polysiphonia	1.42857	During	2017	Kachemak Bay	Bishop's Beach	Low	10
Post_2017_Kachemak Bay_Bishop's Beach_L_10	Ulva / Monostroma	0.714286	During	2017	Kachemak Bay	Bishop's Beach	Low	10
Post_2018_Kachemak Bay_Bishop's Beach_L_1	Acrosiphonia	0	During	2018	Kachemak Bay	Bishop's Beach	Low	1
Post_2018_Kachemak Bay_Bishop's Beach_L_1	Alaria	26.9231	During	2018	Kachemak Bay	Bishop's Beach	Low	1
Post_2018_Kachemak Bay_Bishop's Beach_L_1	bare substrate	53.8462	During	2018	Kachemak Bay	Bishop's Beach	Low	1
Post_2018_Kachemak Bay_Bishop's Beach_L_1	barnacles	0	During	2018	Kachemak Bay	Bishop's Beach	Low	1
Post_2018_Kachemak Bay_Bishop's Beach_L_1	Boreophyllum / Pyropia / Wildemania	0	During	2018	Kachemak Bay	Bishop's Beach	Low	1
Post_2018_Kachemak Bay_Bishop's Beach_L_1	Cladophora / Chaetomorpha	0	During	2018	Kachemak Bay	Bishop's Beach	Low	1
Post_2018_Kachemak Bay_Bishop's Beach_L_1	Cryptosiphonia	0	During	2018	Kachemak Bay	Bishop's Beach	Low	1
Post_2018_Kachemak Bay_Bishop's Beach_L_1	Devaleraea / Palmaria	0	During	2018	Kachemak Bay	Bishop's Beach	Low	1
Post_2018_Kachemak Bay_Bishop's Beach_L_1	encrusting coralline algae	3.84615	During	2018	Kachemak Bay	Bishop's Beach	Low	1
Post_2018_Kachemak Bay_Bishop's Beach_L_1	Fucus	0	During	2018	Kachemak Bay	Bishop's Beach	Low	1
Post_2018_Kachemak Bay_Bishop's Beach_L_1	Gloiopeltis	0	During	2018	Kachemak Bay	Bishop's Beach	Low	1
Post_2018_Kachemak Bay_Bishop's Beach_L_1	Halosaccion	0	During	2018	Kachemak Bay	Bishop's Beach	Low	1
Post_2018_Kachemak Bay_Bishop's Beach_L_1	Mastocarpus / Mazaella	0	During	2018	Kachemak Bay	Bishop's Beach	Low	1
Post_2018_Kachemak Bay_Bishop's Beach_L_1	Mytilus	0	During	2018	Kachemak Bay	Bishop's Beach	Low	1
Post_2018_Kachemak Bay_Bishop's Beach_L_1	non-coralline algal crust	0	During	2018	Kachemak Bay	Bishop's Beach	Low	1
Post_2018_Kachemak Bay_Bishop's Beach_L_1	Odonthalia / Neorhodomela	0	During	2018	Kachemak Bay	Bishop's Beach	Low	1
Post_2018_Kachemak Bay_Bishop's Beach_L_1	Savoiea / Polysiphonia	0	During	2018	Kachemak Bay	Bishop's Beach	Low	1
Post_2018_Kachemak Bay_Bishop's Beach_L_1	Ulva / Monostroma	0	During	2018	Kachemak Bay	Bishop's Beach	Low	1
Post_2018_Kachemak Bay_Bishop's Beach_L_2	Acrosiphonia	15	During	2018	Kachemak Bay	Bishop's Beach	Low	2
Post_2018_Kachemak Bay_Bishop's Beach_L_2	Alaria	0	During	2018	Kachemak Bay	Bishop's Beach	Low	2
Post_2018_Kachemak Bay_Bishop's Beach_L_2	bare substrate	55	During	2018	Kachemak Bay	Bishop's Beach	Low	2
Post_2018_Kachemak Bay_Bishop's Beach_L_2	barnacles	0	During	2018	Kachemak Bay	Bishop's Beach	Low	2
Post_2018_Kachemak Bay_Bishop's Beach_L_2	Boreophyllum / Pyropia / Wildemania	0	During	2018	Kachemak Bay	Bishop's Beach	Low	2
Post_2018_Kachemak Bay_Bishop's Beach_L_2	Cladophora / Chaetomorpha	0	During	2018	Kachemak Bay	Bishop's Beach	Low	2
Post_2018_Kachemak Bay_Bishop's Beach_L_2	Cryptosiphonia	0	During	2018	Kachemak Bay	Bishop's Beach	Low	2
Post_2018_Kachemak Bay_Bishop's Beach_L_2	Devaleraea / Palmaria	15	During	2018	Kachemak Bay	Bishop's Beach	Low	2
Post_2018_Kachemak Bay_Bishop's Beach_L_2	encrusting coralline algae	3	During	2018	Kachemak Bay	Bishop's Beach	Low	2
Post_2018_Kachemak Bay_Bishop's Beach_L_2	Fucus	0	During	2018	Kachemak Bay	Bishop's Beach	Low	2
Post_2018_Kachemak Bay_Bishop's Beach_L_2	Gloiopeltis	0	During	2018	Kachemak Bay	Bishop's Beach	Low	2
Post_2018_Kachemak Bay_Bishop's Beach_L_2	Halosaccion	0	During	2018	Kachemak Bay	Bishop's Beach	Low	2
Post_2018_Kachemak Bay_Bishop's Beach_L_2	Mastocarpus / Mazaella	0	During	2018	Kachemak Bay	Bishop's Beach	Low	2
Post_2018_Kachemak Bay_Bishop's Beach_L_2	Mytilus	0	During	2018	Kachemak Bay	Bishop's Beach	Low	2
Post_2018_Kachemak Bay_Bishop's Beach_L_2	non-coralline algal crust	5	During	2018	Kachemak Bay	Bishop's Beach	Low	2
Post_2018_Kachemak Bay_Bishop's Beach_L_2	Odonthalia / Neorhodomela	0	During	2018	Kachemak Bay	Bishop's Beach	Low	2
Post_2018_Kachemak Bay_Bishop's Beach_L_2	Savoiea / Polysiphonia	0	During	2018	Kachemak Bay	Bishop's Beach	Low	2
Post_2018_Kachemak Bay_Bishop's Beach_L_2	Ulva / Monostroma	1	During	2018	Kachemak Bay	Bishop's Beach	Low	2
Post_2018_Kachemak Bay_Bishop's Beach_L_3	Acrosiphonia	8	During	2018	Kachemak Bay	Bishop's Beach	Low	3
Post_2018_Kachemak Bay_Bishop's Beach_L_3	Alaria	0	During	2018	Kachemak Bay	Bishop's Beach	Low	3
Post_2018_Kachemak Bay_Bishop's Beach_L_3	bare substrate	35	During	2018	Kachemak Bay	Bishop's Beach	Low	3
Post_2018_Kachemak Bay_Bishop's Beach_L_3	barnacles	0	During	2018	Kachemak Bay	Bishop's Beach	Low	3
Post_2018_Kachemak Bay_Bishop's Beach_L_3	Boreophyllum / Pyropia / Wildemania	0	During	2018	Kachemak Bay	Bishop's Beach	Low	3
Post_2018_Kachemak Bay_Bishop's Beach_L_3	Cladophora / Chaetomorpha	0	During	2018	Kachemak Bay	Bishop's Beach	Low	3
Post_2018_Kachemak Bay_Bishop's Beach_L_3	Cryptosiphonia	0	During	2018	Kachemak Bay	Bishop's Beach	Low	3
Post_2018_Kachemak Bay_Bishop's Beach_L_3	Devaleraea / Palmaria	1	During	2018	Kachemak Bay	Bishop's Beach	Low	3
Post_2018_Kachemak Bay_Bishop's Beach_L_3	encrusting coralline algae	20	During	2018	Kachemak Bay	Bishop's Beach	Low	3
Post_2018_Kachemak Bay_Bishop's Beach_L_3	Fucus	0	During	2018	Kachemak Bay	Bishop's Beach	Low	3
Post_2018_Kachemak Bay_Bishop's Beach_L_3	Gloiopeltis	0	During	2018	Kachemak Bay	Bishop's Beach	Low	3
Post_2018_Kachemak Bay_Bishop's Beach_L_3	Halosaccion	0	During	2018	Kachemak Bay	Bishop's Beach	Low	3
Post_2018_Kachemak Bay_Bishop's Beach_L_3	Mastocarpus / Mazaella	0	During	2018	Kachemak Bay	Bishop's Beach	Low	3
Post_2018_Kachemak Bay_Bishop's Beach_L_3	Mytilus	0	During	2018	Kachemak Bay	Bishop's Beach	Low	3
Post_2018_Kachemak Bay_Bishop's Beach_L_3	non-coralline algal crust	0	During	2018	Kachemak Bay	Bishop's Beach	Low	3
Post_2018_Kachemak Bay_Bishop's Beach_L_3	Odonthalia / Neorhodomela	0	During	2018	Kachemak Bay	Bishop's Beach	Low	3
Post_2018_Kachemak Bay_Bishop's Beach_L_3	Savoiea / Polysiphonia	0	During	2018	Kachemak Bay	Bishop's Beach	Low	3
Post_2018_Kachemak Bay_Bishop's Beach_L_3	Ulva / Monostroma	2	During	2018	Kachemak Bay	Bishop's Beach	Low	3
Post_2018_Kachemak Bay_Bishop's Beach_L_4	Acrosiphonia	4.34783	During	2018	Kachemak Bay	Bishop's Beach	Low	4
Post_2018_Kachemak Bay_Bishop's Beach_L_4	Alaria	13.913	During	2018	Kachemak Bay	Bishop's Beach	Low	4
Post_2018_Kachemak Bay_Bishop's Beach_L_4	bare substrate	69.5652	During	2018	Kachemak Bay	Bishop's Beach	Low	4
Post_2018_Kachemak Bay_Bishop's Beach_L_4	barnacles	0.869565	During	2018	Kachemak Bay	Bishop's Beach	Low	4
Post_2018_Kachemak Bay_Bishop's Beach_L_4	Boreophyllum / Pyropia / Wildemania	0	During	2018	Kachemak Bay	Bishop's Beach	Low	4
Post_2018_Kachemak Bay_Bishop's Beach_L_4	Cladophora / Chaetomorpha	0	During	2018	Kachemak Bay	Bishop's Beach	Low	4
Post_2018_Kachemak Bay_Bishop's Beach_L_4	Cryptosiphonia	0	During	2018	Kachemak Bay	Bishop's Beach	Low	4
Post_2018_Kachemak Bay_Bishop's Beach_L_4	Devaleraea / Palmaria	0	During	2018	Kachemak Bay	Bishop's Beach	Low	4
Post_2018_Kachemak Bay_Bishop's Beach_L_4	encrusting coralline algae	7.82609	During	2018	Kachemak Bay	Bishop's Beach	Low	4
Post_2018_Kachemak Bay_Bishop's Beach_L_4	Fucus	0	During	2018	Kachemak Bay	Bishop's Beach	Low	4
Post_2018_Kachemak Bay_Bishop's Beach_L_4	Gloiopeltis	0	During	2018	Kachemak Bay	Bishop's Beach	Low	4
Post_2018_Kachemak Bay_Bishop's Beach_L_4	Halosaccion	0	During	2018	Kachemak Bay	Bishop's Beach	Low	4
Post_2018_Kachemak Bay_Bishop's Beach_L_4	Mastocarpus / Mazaella	0	During	2018	Kachemak Bay	Bishop's Beach	Low	4
Post_2018_Kachemak Bay_Bishop's Beach_L_4	Mytilus	0	During	2018	Kachemak Bay	Bishop's Beach	Low	4
Post_2018_Kachemak Bay_Bishop's Beach_L_4	non-coralline algal crust	0	During	2018	Kachemak Bay	Bishop's Beach	Low	4
Post_2018_Kachemak Bay_Bishop's Beach_L_4	Odonthalia / Neorhodomela	0	During	2018	Kachemak Bay	Bishop's Beach	Low	4
Post_2018_Kachemak Bay_Bishop's Beach_L_4	Savoiea / Polysiphonia	0	During	2018	Kachemak Bay	Bishop's Beach	Low	4
Post_2018_Kachemak Bay_Bishop's Beach_L_4	Ulva / Monostroma	0	During	2018	Kachemak Bay	Bishop's Beach	Low	4
Post_2018_Kachemak Bay_Bishop's Beach_L_5	Acrosiphonia	0	During	2018	Kachemak Bay	Bishop's Beach	Low	5
Post_2018_Kachemak Bay_Bishop's Beach_L_5	Alaria	55	During	2018	Kachemak Bay	Bishop's Beach	Low	5
Post_2018_Kachemak Bay_Bishop's Beach_L_5	bare substrate	11	During	2018	Kachemak Bay	Bishop's Beach	Low	5
Post_2018_Kachemak Bay_Bishop's Beach_L_5	barnacles	0	During	2018	Kachemak Bay	Bishop's Beach	Low	5
Post_2018_Kachemak Bay_Bishop's Beach_L_5	Boreophyllum / Pyropia / Wildemania	0	During	2018	Kachemak Bay	Bishop's Beach	Low	5
Post_2018_Kachemak Bay_Bishop's Beach_L_5	Cladophora / Chaetomorpha	0	During	2018	Kachemak Bay	Bishop's Beach	Low	5
Post_2018_Kachemak Bay_Bishop's Beach_L_5	Cryptosiphonia	0	During	2018	Kachemak Bay	Bishop's Beach	Low	5
Post_2018_Kachemak Bay_Bishop's Beach_L_5	Devaleraea / Palmaria	2.5	During	2018	Kachemak Bay	Bishop's Beach	Low	5
Post_2018_Kachemak Bay_Bishop's Beach_L_5	encrusting coralline algae	15	During	2018	Kachemak Bay	Bishop's Beach	Low	5
Post_2018_Kachemak Bay_Bishop's Beach_L_5	Fucus	0	During	2018	Kachemak Bay	Bishop's Beach	Low	5
Post_2018_Kachemak Bay_Bishop's Beach_L_5	Gloiopeltis	0	During	2018	Kachemak Bay	Bishop's Beach	Low	5
Post_2018_Kachemak Bay_Bishop's Beach_L_5	Halosaccion	0	During	2018	Kachemak Bay	Bishop's Beach	Low	5
Post_2018_Kachemak Bay_Bishop's Beach_L_5	Mastocarpus / Mazaella	0	During	2018	Kachemak Bay	Bishop's Beach	Low	5
Post_2018_Kachemak Bay_Bishop's Beach_L_5	Mytilus	0	During	2018	Kachemak Bay	Bishop's Beach	Low	5
Post_2018_Kachemak Bay_Bishop's Beach_L_5	non-coralline algal crust	0	During	2018	Kachemak Bay	Bishop's Beach	Low	5
Post_2018_Kachemak Bay_Bishop's Beach_L_5	Odonthalia / Neorhodomela	0	During	2018	Kachemak Bay	Bishop's Beach	Low	5
Post_2018_Kachemak Bay_Bishop's Beach_L_5	Savoiea / Polysiphonia	0	During	2018	Kachemak Bay	Bishop's Beach	Low	5
Post_2018_Kachemak Bay_Bishop's Beach_L_5	Ulva / Monostroma	0	During	2018	Kachemak Bay	Bishop's Beach	Low	5
Post_2018_Kachemak Bay_Bishop's Beach_L_6	Acrosiphonia	0	During	2018	Kachemak Bay	Bishop's Beach	Low	6
Post_2018_Kachemak Bay_Bishop's Beach_L_6	Alaria	6.66667	During	2018	Kachemak Bay	Bishop's Beach	Low	6
Post_2018_Kachemak Bay_Bishop's Beach_L_6	bare substrate	25.7143	During	2018	Kachemak Bay	Bishop's Beach	Low	6
Post_2018_Kachemak Bay_Bishop's Beach_L_6	barnacles	1.90476	During	2018	Kachemak Bay	Bishop's Beach	Low	6
Post_2018_Kachemak Bay_Bishop's Beach_L_6	Boreophyllum / Pyropia / Wildemania	0	During	2018	Kachemak Bay	Bishop's Beach	Low	6
Post_2018_Kachemak Bay_Bishop's Beach_L_6	Cladophora / Chaetomorpha	0	During	2018	Kachemak Bay	Bishop's Beach	Low	6
Post_2018_Kachemak Bay_Bishop's Beach_L_6	Cryptosiphonia	0	During	2018	Kachemak Bay	Bishop's Beach	Low	6
Post_2018_Kachemak Bay_Bishop's Beach_L_6	Devaleraea / Palmaria	0	During	2018	Kachemak Bay	Bishop's Beach	Low	6
Post_2018_Kachemak Bay_Bishop's Beach_L_6	encrusting coralline algae	4.7619	During	2018	Kachemak Bay	Bishop's Beach	Low	6
Post_2018_Kachemak Bay_Bishop's Beach_L_6	Fucus	2.85714	During	2018	Kachemak Bay	Bishop's Beach	Low	6
Post_2018_Kachemak Bay_Bishop's Beach_L_6	Gloiopeltis	0	During	2018	Kachemak Bay	Bishop's Beach	Low	6
Post_2018_Kachemak Bay_Bishop's Beach_L_6	Halosaccion	0	During	2018	Kachemak Bay	Bishop's Beach	Low	6
Post_2018_Kachemak Bay_Bishop's Beach_L_6	Mastocarpus / Mazaella	0	During	2018	Kachemak Bay	Bishop's Beach	Low	6
Post_2018_Kachemak Bay_Bishop's Beach_L_6	Mytilus	14.2857	During	2018	Kachemak Bay	Bishop's Beach	Low	6
Post_2018_Kachemak Bay_Bishop's Beach_L_6	non-coralline algal crust	0	During	2018	Kachemak Bay	Bishop's Beach	Low	6
Post_2018_Kachemak Bay_Bishop's Beach_L_6	Odonthalia / Neorhodomela	0	During	2018	Kachemak Bay	Bishop's Beach	Low	6
Post_2018_Kachemak Bay_Bishop's Beach_L_6	Savoiea / Polysiphonia	0	During	2018	Kachemak Bay	Bishop's Beach	Low	6
Post_2018_Kachemak Bay_Bishop's Beach_L_6	Ulva / Monostroma	2.85714	During	2018	Kachemak Bay	Bishop's Beach	Low	6
Post_2018_Kachemak Bay_Bishop's Beach_L_7	Acrosiphonia	1.90476	During	2018	Kachemak Bay	Bishop's Beach	Low	7
Post_2018_Kachemak Bay_Bishop's Beach_L_7	Alaria	6.66667	During	2018	Kachemak Bay	Bishop's Beach	Low	7
Post_2018_Kachemak Bay_Bishop's Beach_L_7	bare substrate	53.3333	During	2018	Kachemak Bay	Bishop's Beach	Low	7
Post_2018_Kachemak Bay_Bishop's Beach_L_7	barnacles	0	During	2018	Kachemak Bay	Bishop's Beach	Low	7
Post_2018_Kachemak Bay_Bishop's Beach_L_7	Boreophyllum / Pyropia / Wildemania	0	During	2018	Kachemak Bay	Bishop's Beach	Low	7
Post_2018_Kachemak Bay_Bishop's Beach_L_7	Cladophora / Chaetomorpha	0	During	2018	Kachemak Bay	Bishop's Beach	Low	7
Post_2018_Kachemak Bay_Bishop's Beach_L_7	Cryptosiphonia	0	During	2018	Kachemak Bay	Bishop's Beach	Low	7
Post_2018_Kachemak Bay_Bishop's Beach_L_7	Devaleraea / Palmaria	0	During	2018	Kachemak Bay	Bishop's Beach	Low	7
Post_2018_Kachemak Bay_Bishop's Beach_L_7	encrusting coralline algae	4.7619	During	2018	Kachemak Bay	Bishop's Beach	Low	7
Post_2018_Kachemak Bay_Bishop's Beach_L_7	Fucus	0	During	2018	Kachemak Bay	Bishop's Beach	Low	7
Post_2018_Kachemak Bay_Bishop's Beach_L_7	Gloiopeltis	0	During	2018	Kachemak Bay	Bishop's Beach	Low	7
Post_2018_Kachemak Bay_Bishop's Beach_L_7	Halosaccion	0	During	2018	Kachemak Bay	Bishop's Beach	Low	7
Post_2018_Kachemak Bay_Bishop's Beach_L_7	Mastocarpus / Mazaella	0	During	2018	Kachemak Bay	Bishop's Beach	Low	7
Post_2018_Kachemak Bay_Bishop's Beach_L_7	Mytilus	2.85714	During	2018	Kachemak Bay	Bishop's Beach	Low	7
Post_2018_Kachemak Bay_Bishop's Beach_L_7	non-coralline algal crust	0	During	2018	Kachemak Bay	Bishop's Beach	Low	7
Post_2018_Kachemak Bay_Bishop's Beach_L_7	Odonthalia / Neorhodomela	0	During	2018	Kachemak Bay	Bishop's Beach	Low	7
Post_2018_Kachemak Bay_Bishop's Beach_L_7	Savoiea / Polysiphonia	0	During	2018	Kachemak Bay	Bishop's Beach	Low	7
Post_2018_Kachemak Bay_Bishop's Beach_L_7	Ulva / Monostroma	0	During	2018	Kachemak Bay	Bishop's Beach	Low	7
Post_2018_Kachemak Bay_Bishop's Beach_L_8	Acrosiphonia	1	During	2018	Kachemak Bay	Bishop's Beach	Low	8
Post_2018_Kachemak Bay_Bishop's Beach_L_8	Alaria	0	During	2018	Kachemak Bay	Bishop's Beach	Low	8
Post_2018_Kachemak Bay_Bishop's Beach_L_8	bare substrate	55	During	2018	Kachemak Bay	Bishop's Beach	Low	8
Post_2018_Kachemak Bay_Bishop's Beach_L_8	barnacles	0	During	2018	Kachemak Bay	Bishop's Beach	Low	8
Post_2018_Kachemak Bay_Bishop's Beach_L_8	Boreophyllum / Pyropia / Wildemania	0	During	2018	Kachemak Bay	Bishop's Beach	Low	8
Post_2018_Kachemak Bay_Bishop's Beach_L_8	Cladophora / Chaetomorpha	0	During	2018	Kachemak Bay	Bishop's Beach	Low	8
Post_2018_Kachemak Bay_Bishop's Beach_L_8	Cryptosiphonia	0	During	2018	Kachemak Bay	Bishop's Beach	Low	8
Post_2018_Kachemak Bay_Bishop's Beach_L_8	Devaleraea / Palmaria	0	During	2018	Kachemak Bay	Bishop's Beach	Low	8
Post_2018_Kachemak Bay_Bishop's Beach_L_8	encrusting coralline algae	8	During	2018	Kachemak Bay	Bishop's Beach	Low	8
Post_2018_Kachemak Bay_Bishop's Beach_L_8	Fucus	5	During	2018	Kachemak Bay	Bishop's Beach	Low	8
Post_2018_Kachemak Bay_Bishop's Beach_L_8	Gloiopeltis	0	During	2018	Kachemak Bay	Bishop's Beach	Low	8
Post_2018_Kachemak Bay_Bishop's Beach_L_8	Halosaccion	0	During	2018	Kachemak Bay	Bishop's Beach	Low	8
Post_2018_Kachemak Bay_Bishop's Beach_L_8	Mastocarpus / Mazaella	0	During	2018	Kachemak Bay	Bishop's Beach	Low	8
Post_2018_Kachemak Bay_Bishop's Beach_L_8	Mytilus	2	During	2018	Kachemak Bay	Bishop's Beach	Low	8
Post_2018_Kachemak Bay_Bishop's Beach_L_8	non-coralline algal crust	4	During	2018	Kachemak Bay	Bishop's Beach	Low	8
Post_2018_Kachemak Bay_Bishop's Beach_L_8	Odonthalia / Neorhodomela	0	During	2018	Kachemak Bay	Bishop's Beach	Low	8
Post_2018_Kachemak Bay_Bishop's Beach_L_8	Savoiea / Polysiphonia	0	During	2018	Kachemak Bay	Bishop's Beach	Low	8
Post_2018_Kachemak Bay_Bishop's Beach_L_8	Ulva / Monostroma	0	During	2018	Kachemak Bay	Bishop's Beach	Low	8
Post_2018_Kachemak Bay_Bishop's Beach_L_9	Acrosiphonia	10	During	2018	Kachemak Bay	Bishop's Beach	Low	9
Post_2018_Kachemak Bay_Bishop's Beach_L_9	Alaria	0	During	2018	Kachemak Bay	Bishop's Beach	Low	9
Post_2018_Kachemak Bay_Bishop's Beach_L_9	bare substrate	74	During	2018	Kachemak Bay	Bishop's Beach	Low	9
Post_2018_Kachemak Bay_Bishop's Beach_L_9	barnacles	1	During	2018	Kachemak Bay	Bishop's Beach	Low	9
Post_2018_Kachemak Bay_Bishop's Beach_L_9	Boreophyllum / Pyropia / Wildemania	0	During	2018	Kachemak Bay	Bishop's Beach	Low	9
Post_2018_Kachemak Bay_Bishop's Beach_L_9	Cladophora / Chaetomorpha	0	During	2018	Kachemak Bay	Bishop's Beach	Low	9
Post_2018_Kachemak Bay_Bishop's Beach_L_9	Cryptosiphonia	0	During	2018	Kachemak Bay	Bishop's Beach	Low	9
Post_2018_Kachemak Bay_Bishop's Beach_L_9	Devaleraea / Palmaria	1	During	2018	Kachemak Bay	Bishop's Beach	Low	9
Post_2018_Kachemak Bay_Bishop's Beach_L_9	encrusting coralline algae	0	During	2018	Kachemak Bay	Bishop's Beach	Low	9
Post_2018_Kachemak Bay_Bishop's Beach_L_9	Fucus	5	During	2018	Kachemak Bay	Bishop's Beach	Low	9
Post_2018_Kachemak Bay_Bishop's Beach_L_9	Gloiopeltis	0	During	2018	Kachemak Bay	Bishop's Beach	Low	9
Post_2018_Kachemak Bay_Bishop's Beach_L_9	Halosaccion	0	During	2018	Kachemak Bay	Bishop's Beach	Low	9
Post_2018_Kachemak Bay_Bishop's Beach_L_9	Mastocarpus / Mazaella	0	During	2018	Kachemak Bay	Bishop's Beach	Low	9
Post_2018_Kachemak Bay_Bishop's Beach_L_9	Mytilus	5	During	2018	Kachemak Bay	Bishop's Beach	Low	9
Post_2018_Kachemak Bay_Bishop's Beach_L_9	non-coralline algal crust	0	During	2018	Kachemak Bay	Bishop's Beach	Low	9
Post_2018_Kachemak Bay_Bishop's Beach_L_9	Odonthalia / Neorhodomela	0	During	2018	Kachemak Bay	Bishop's Beach	Low	9
Post_2018_Kachemak Bay_Bishop's Beach_L_9	Savoiea / Polysiphonia	2	During	2018	Kachemak Bay	Bishop's Beach	Low	9
Post_2018_Kachemak Bay_Bishop's Beach_L_9	Ulva / Monostroma	0	During	2018	Kachemak Bay	Bishop's Beach	Low	9
Post_2018_Kachemak Bay_Bishop's Beach_L_10	Acrosiphonia	13.0435	During	2018	Kachemak Bay	Bishop's Beach	Low	10
Post_2018_Kachemak Bay_Bishop's Beach_L_10	Alaria	14.7826	During	2018	Kachemak Bay	Bishop's Beach	Low	10
Post_2018_Kachemak Bay_Bishop's Beach_L_10	bare substrate	20.8696	During	2018	Kachemak Bay	Bishop's Beach	Low	10
Post_2018_Kachemak Bay_Bishop's Beach_L_10	barnacles	0	During	2018	Kachemak Bay	Bishop's Beach	Low	10
Post_2018_Kachemak Bay_Bishop's Beach_L_10	Boreophyllum / Pyropia / Wildemania	0	During	2018	Kachemak Bay	Bishop's Beach	Low	10
Post_2018_Kachemak Bay_Bishop's Beach_L_10	Cladophora / Chaetomorpha	0	During	2018	Kachemak Bay	Bishop's Beach	Low	10
Post_2018_Kachemak Bay_Bishop's Beach_L_10	Cryptosiphonia	0.869565	During	2018	Kachemak Bay	Bishop's Beach	Low	10
Post_2018_Kachemak Bay_Bishop's Beach_L_10	Devaleraea / Palmaria	13.0435	During	2018	Kachemak Bay	Bishop's Beach	Low	10
Post_2018_Kachemak Bay_Bishop's Beach_L_10	encrusting coralline algae	17.3913	During	2018	Kachemak Bay	Bishop's Beach	Low	10
Post_2018_Kachemak Bay_Bishop's Beach_L_10	Fucus	0	During	2018	Kachemak Bay	Bishop's Beach	Low	10
Post_2018_Kachemak Bay_Bishop's Beach_L_10	Gloiopeltis	0	During	2018	Kachemak Bay	Bishop's Beach	Low	10
Post_2018_Kachemak Bay_Bishop's Beach_L_10	Halosaccion	0	During	2018	Kachemak Bay	Bishop's Beach	Low	10
Post_2018_Kachemak Bay_Bishop's Beach_L_10	Mastocarpus / Mazaella	0	During	2018	Kachemak Bay	Bishop's Beach	Low	10
Post_2018_Kachemak Bay_Bishop's Beach_L_10	Mytilus	0.869565	During	2018	Kachemak Bay	Bishop's Beach	Low	10
Post_2018_Kachemak Bay_Bishop's Beach_L_10	non-coralline algal crust	3.47826	During	2018	Kachemak Bay	Bishop's Beach	Low	10
Post_2018_Kachemak Bay_Bishop's Beach_L_10	Odonthalia / Neorhodomela	0	During	2018	Kachemak Bay	Bishop's Beach	Low	10
Post_2018_Kachemak Bay_Bishop's Beach_L_10	Savoiea / Polysiphonia	6.95652	During	2018	Kachemak Bay	Bishop's Beach	Low	10
Post_2018_Kachemak Bay_Bishop's Beach_L_10	Ulva / Monostroma	0	During	2018	Kachemak Bay	Bishop's Beach	Low	10
Post_2019_Kachemak Bay_Bishop's Beach_L_1	Acrosiphonia	1.53846	During	2019	Kachemak Bay	Bishop's Beach	Low	1
Post_2019_Kachemak Bay_Bishop's Beach_L_1	Alaria	21.5385	During	2019	Kachemak Bay	Bishop's Beach	Low	1
Post_2019_Kachemak Bay_Bishop's Beach_L_1	bare substrate	36.1538	During	2019	Kachemak Bay	Bishop's Beach	Low	1
Post_2019_Kachemak Bay_Bishop's Beach_L_1	barnacles	2.30769	During	2019	Kachemak Bay	Bishop's Beach	Low	1
Post_2019_Kachemak Bay_Bishop's Beach_L_1	Boreophyllum / Pyropia / Wildemania	0	During	2019	Kachemak Bay	Bishop's Beach	Low	1
Post_2019_Kachemak Bay_Bishop's Beach_L_1	Cladophora / Chaetomorpha	0	During	2019	Kachemak Bay	Bishop's Beach	Low	1
Post_2019_Kachemak Bay_Bishop's Beach_L_1	Cryptosiphonia	0	During	2019	Kachemak Bay	Bishop's Beach	Low	1
Post_2019_Kachemak Bay_Bishop's Beach_L_1	Devaleraea / Palmaria	2.30769	During	2019	Kachemak Bay	Bishop's Beach	Low	1
Post_2019_Kachemak Bay_Bishop's Beach_L_1	encrusting coralline algae	19.2308	During	2019	Kachemak Bay	Bishop's Beach	Low	1
Post_2019_Kachemak Bay_Bishop's Beach_L_1	Fucus	0	During	2019	Kachemak Bay	Bishop's Beach	Low	1
Post_2019_Kachemak Bay_Bishop's Beach_L_1	Gloiopeltis	0	During	2019	Kachemak Bay	Bishop's Beach	Low	1
Post_2019_Kachemak Bay_Bishop's Beach_L_1	Halosaccion	0	During	2019	Kachemak Bay	Bishop's Beach	Low	1
Post_2019_Kachemak Bay_Bishop's Beach_L_1	Mastocarpus / Mazaella	0	During	2019	Kachemak Bay	Bishop's Beach	Low	1
Post_2019_Kachemak Bay_Bishop's Beach_L_1	Mytilus	3.07692	During	2019	Kachemak Bay	Bishop's Beach	Low	1
Post_2019_Kachemak Bay_Bishop's Beach_L_1	non-coralline algal crust	0	During	2019	Kachemak Bay	Bishop's Beach	Low	1
Post_2019_Kachemak Bay_Bishop's Beach_L_1	Odonthalia / Neorhodomela	0	During	2019	Kachemak Bay	Bishop's Beach	Low	1
Post_2019_Kachemak Bay_Bishop's Beach_L_1	Savoiea / Polysiphonia	0	During	2019	Kachemak Bay	Bishop's Beach	Low	1
Post_2019_Kachemak Bay_Bishop's Beach_L_1	Ulva / Monostroma	0	During	2019	Kachemak Bay	Bishop's Beach	Low	1
Post_2019_Kachemak Bay_Bishop's Beach_L_2	Acrosiphonia	3	During	2019	Kachemak Bay	Bishop's Beach	Low	2
Post_2019_Kachemak Bay_Bishop's Beach_L_2	Alaria	3	During	2019	Kachemak Bay	Bishop's Beach	Low	2
Post_2019_Kachemak Bay_Bishop's Beach_L_2	bare substrate	50	During	2019	Kachemak Bay	Bishop's Beach	Low	2
Post_2019_Kachemak Bay_Bishop's Beach_L_2	barnacles	0	During	2019	Kachemak Bay	Bishop's Beach	Low	2
Post_2019_Kachemak Bay_Bishop's Beach_L_2	Boreophyllum / Pyropia / Wildemania	0	During	2019	Kachemak Bay	Bishop's Beach	Low	2
Post_2019_Kachemak Bay_Bishop's Beach_L_2	Cladophora / Chaetomorpha	0	During	2019	Kachemak Bay	Bishop's Beach	Low	2
Post_2019_Kachemak Bay_Bishop's Beach_L_2	Cryptosiphonia	0	During	2019	Kachemak Bay	Bishop's Beach	Low	2
Post_2019_Kachemak Bay_Bishop's Beach_L_2	Devaleraea / Palmaria	0	During	2019	Kachemak Bay	Bishop's Beach	Low	2
Post_2019_Kachemak Bay_Bishop's Beach_L_2	encrusting coralline algae	35	During	2019	Kachemak Bay	Bishop's Beach	Low	2
Post_2019_Kachemak Bay_Bishop's Beach_L_2	Fucus	0	During	2019	Kachemak Bay	Bishop's Beach	Low	2
Post_2019_Kachemak Bay_Bishop's Beach_L_2	Gloiopeltis	0	During	2019	Kachemak Bay	Bishop's Beach	Low	2
Post_2019_Kachemak Bay_Bishop's Beach_L_2	Halosaccion	0	During	2019	Kachemak Bay	Bishop's Beach	Low	2
Post_2019_Kachemak Bay_Bishop's Beach_L_2	Mastocarpus / Mazaella	0	During	2019	Kachemak Bay	Bishop's Beach	Low	2
Post_2019_Kachemak Bay_Bishop's Beach_L_2	Mytilus	0	During	2019	Kachemak Bay	Bishop's Beach	Low	2
Post_2019_Kachemak Bay_Bishop's Beach_L_2	non-coralline algal crust	0	During	2019	Kachemak Bay	Bishop's Beach	Low	2
Post_2019_Kachemak Bay_Bishop's Beach_L_2	Odonthalia / Neorhodomela	0	During	2019	Kachemak Bay	Bishop's Beach	Low	2
Post_2019_Kachemak Bay_Bishop's Beach_L_2	Savoiea / Polysiphonia	3	During	2019	Kachemak Bay	Bishop's Beach	Low	2
Post_2019_Kachemak Bay_Bishop's Beach_L_2	Ulva / Monostroma	0	During	2019	Kachemak Bay	Bishop's Beach	Low	2
Post_2019_Kachemak Bay_Bishop's Beach_L_3	Acrosiphonia	2	During	2019	Kachemak Bay	Bishop's Beach	Low	3
Post_2019_Kachemak Bay_Bishop's Beach_L_3	Alaria	0	During	2019	Kachemak Bay	Bishop's Beach	Low	3
Post_2019_Kachemak Bay_Bishop's Beach_L_3	bare substrate	61	During	2019	Kachemak Bay	Bishop's Beach	Low	3
Post_2019_Kachemak Bay_Bishop's Beach_L_3	barnacles	0	During	2019	Kachemak Bay	Bishop's Beach	Low	3
Post_2019_Kachemak Bay_Bishop's Beach_L_3	Boreophyllum / Pyropia / Wildemania	5	During	2019	Kachemak Bay	Bishop's Beach	Low	3
Post_2019_Kachemak Bay_Bishop's Beach_L_3	Cladophora / Chaetomorpha	0	During	2019	Kachemak Bay	Bishop's Beach	Low	3
Post_2019_Kachemak Bay_Bishop's Beach_L_3	Cryptosiphonia	0	During	2019	Kachemak Bay	Bishop's Beach	Low	3
Post_2019_Kachemak Bay_Bishop's Beach_L_3	Devaleraea / Palmaria	1	During	2019	Kachemak Bay	Bishop's Beach	Low	3
Post_2019_Kachemak Bay_Bishop's Beach_L_3	encrusting coralline algae	20	During	2019	Kachemak Bay	Bishop's Beach	Low	3
Post_2019_Kachemak Bay_Bishop's Beach_L_3	Fucus	0	During	2019	Kachemak Bay	Bishop's Beach	Low	3
Post_2019_Kachemak Bay_Bishop's Beach_L_3	Gloiopeltis	0	During	2019	Kachemak Bay	Bishop's Beach	Low	3
Post_2019_Kachemak Bay_Bishop's Beach_L_3	Halosaccion	0	During	2019	Kachemak Bay	Bishop's Beach	Low	3
Post_2019_Kachemak Bay_Bishop's Beach_L_3	Mastocarpus / Mazaella	0	During	2019	Kachemak Bay	Bishop's Beach	Low	3
Post_2019_Kachemak Bay_Bishop's Beach_L_3	Mytilus	5	During	2019	Kachemak Bay	Bishop's Beach	Low	3
Post_2019_Kachemak Bay_Bishop's Beach_L_3	non-coralline algal crust	0	During	2019	Kachemak Bay	Bishop's Beach	Low	3
Post_2019_Kachemak Bay_Bishop's Beach_L_3	Odonthalia / Neorhodomela	0	During	2019	Kachemak Bay	Bishop's Beach	Low	3
Post_2019_Kachemak Bay_Bishop's Beach_L_3	Savoiea / Polysiphonia	0	During	2019	Kachemak Bay	Bishop's Beach	Low	3
Post_2019_Kachemak Bay_Bishop's Beach_L_3	Ulva / Monostroma	1	During	2019	Kachemak Bay	Bishop's Beach	Low	3
Post_2019_Kachemak Bay_Bishop's Beach_L_4	Acrosiphonia	0	During	2019	Kachemak Bay	Bishop's Beach	Low	4
Post_2019_Kachemak Bay_Bishop's Beach_L_4	Alaria	21.6	During	2019	Kachemak Bay	Bishop's Beach	Low	4
Post_2019_Kachemak Bay_Bishop's Beach_L_4	bare substrate	68	During	2019	Kachemak Bay	Bishop's Beach	Low	4
Post_2019_Kachemak Bay_Bishop's Beach_L_4	barnacles	0	During	2019	Kachemak Bay	Bishop's Beach	Low	4
Post_2019_Kachemak Bay_Bishop's Beach_L_4	Boreophyllum / Pyropia / Wildemania	0	During	2019	Kachemak Bay	Bishop's Beach	Low	4
Post_2019_Kachemak Bay_Bishop's Beach_L_4	Cladophora / Chaetomorpha	0	During	2019	Kachemak Bay	Bishop's Beach	Low	4
Post_2019_Kachemak Bay_Bishop's Beach_L_4	Cryptosiphonia	0	During	2019	Kachemak Bay	Bishop's Beach	Low	4
Post_2019_Kachemak Bay_Bishop's Beach_L_4	Devaleraea / Palmaria	0	During	2019	Kachemak Bay	Bishop's Beach	Low	4
Post_2019_Kachemak Bay_Bishop's Beach_L_4	encrusting coralline algae	2.4	During	2019	Kachemak Bay	Bishop's Beach	Low	4
Post_2019_Kachemak Bay_Bishop's Beach_L_4	Fucus	0	During	2019	Kachemak Bay	Bishop's Beach	Low	4
Post_2019_Kachemak Bay_Bishop's Beach_L_4	Gloiopeltis	0	During	2019	Kachemak Bay	Bishop's Beach	Low	4
Post_2019_Kachemak Bay_Bishop's Beach_L_4	Halosaccion	0	During	2019	Kachemak Bay	Bishop's Beach	Low	4
Post_2019_Kachemak Bay_Bishop's Beach_L_4	Mastocarpus / Mazaella	0	During	2019	Kachemak Bay	Bishop's Beach	Low	4
Post_2019_Kachemak Bay_Bishop's Beach_L_4	Mytilus	0	During	2019	Kachemak Bay	Bishop's Beach	Low	4
Post_2019_Kachemak Bay_Bishop's Beach_L_4	non-coralline algal crust	0	During	2019	Kachemak Bay	Bishop's Beach	Low	4
Post_2019_Kachemak Bay_Bishop's Beach_L_4	Odonthalia / Neorhodomela	0	During	2019	Kachemak Bay	Bishop's Beach	Low	4
Post_2019_Kachemak Bay_Bishop's Beach_L_4	Savoiea / Polysiphonia	0	During	2019	Kachemak Bay	Bishop's Beach	Low	4
Post_2019_Kachemak Bay_Bishop's Beach_L_4	Ulva / Monostroma	0	During	2019	Kachemak Bay	Bishop's Beach	Low	4
Post_2019_Kachemak Bay_Bishop's Beach_L_5	Acrosiphonia	0	During	2019	Kachemak Bay	Bishop's Beach	Low	5
Post_2019_Kachemak Bay_Bishop's Beach_L_5	Alaria	0	During	2019	Kachemak Bay	Bishop's Beach	Low	5
Post_2019_Kachemak Bay_Bishop's Beach_L_5	bare substrate	22.7778	During	2019	Kachemak Bay	Bishop's Beach	Low	5
Post_2019_Kachemak Bay_Bishop's Beach_L_5	barnacles	0	During	2019	Kachemak Bay	Bishop's Beach	Low	5
Post_2019_Kachemak Bay_Bishop's Beach_L_5	Boreophyllum / Pyropia / Wildemania	0	During	2019	Kachemak Bay	Bishop's Beach	Low	5
Post_2019_Kachemak Bay_Bishop's Beach_L_5	Cladophora / Chaetomorpha	0	During	2019	Kachemak Bay	Bishop's Beach	Low	5
Post_2019_Kachemak Bay_Bishop's Beach_L_5	Cryptosiphonia	0	During	2019	Kachemak Bay	Bishop's Beach	Low	5
Post_2019_Kachemak Bay_Bishop's Beach_L_5	Devaleraea / Palmaria	1.11111	During	2019	Kachemak Bay	Bishop's Beach	Low	5
Post_2019_Kachemak Bay_Bishop's Beach_L_5	encrusting coralline algae	19.4444	During	2019	Kachemak Bay	Bishop's Beach	Low	5
Post_2019_Kachemak Bay_Bishop's Beach_L_5	Fucus	0	During	2019	Kachemak Bay	Bishop's Beach	Low	5
Post_2019_Kachemak Bay_Bishop's Beach_L_5	Gloiopeltis	0	During	2019	Kachemak Bay	Bishop's Beach	Low	5
Post_2019_Kachemak Bay_Bishop's Beach_L_5	Halosaccion	0	During	2019	Kachemak Bay	Bishop's Beach	Low	5
Post_2019_Kachemak Bay_Bishop's Beach_L_5	Mastocarpus / Mazaella	0	During	2019	Kachemak Bay	Bishop's Beach	Low	5
Post_2019_Kachemak Bay_Bishop's Beach_L_5	Mytilus	0	During	2019	Kachemak Bay	Bishop's Beach	Low	5
Post_2019_Kachemak Bay_Bishop's Beach_L_5	non-coralline algal crust	0	During	2019	Kachemak Bay	Bishop's Beach	Low	5
Post_2019_Kachemak Bay_Bishop's Beach_L_5	Odonthalia / Neorhodomela	0	During	2019	Kachemak Bay	Bishop's Beach	Low	5
Post_2019_Kachemak Bay_Bishop's Beach_L_5	Savoiea / Polysiphonia	0	During	2019	Kachemak Bay	Bishop's Beach	Low	5
Post_2019_Kachemak Bay_Bishop's Beach_L_5	Ulva / Monostroma	0	During	2019	Kachemak Bay	Bishop's Beach	Low	5
Post_2019_Kachemak Bay_Bishop's Beach_L_6	Acrosiphonia	0	During	2019	Kachemak Bay	Bishop's Beach	Low	6
Post_2019_Kachemak Bay_Bishop's Beach_L_6	Alaria	27.5	During	2019	Kachemak Bay	Bishop's Beach	Low	6
Post_2019_Kachemak Bay_Bishop's Beach_L_6	bare substrate	20	During	2019	Kachemak Bay	Bishop's Beach	Low	6
Post_2019_Kachemak Bay_Bishop's Beach_L_6	barnacles	0	During	2019	Kachemak Bay	Bishop's Beach	Low	6
Post_2019_Kachemak Bay_Bishop's Beach_L_6	Boreophyllum / Pyropia / Wildemania	0	During	2019	Kachemak Bay	Bishop's Beach	Low	6
Post_2019_Kachemak Bay_Bishop's Beach_L_6	Cladophora / Chaetomorpha	0	During	2019	Kachemak Bay	Bishop's Beach	Low	6
Post_2019_Kachemak Bay_Bishop's Beach_L_6	Cryptosiphonia	0	During	2019	Kachemak Bay	Bishop's Beach	Low	6
Post_2019_Kachemak Bay_Bishop's Beach_L_6	Devaleraea / Palmaria	1	During	2019	Kachemak Bay	Bishop's Beach	Low	6
Post_2019_Kachemak Bay_Bishop's Beach_L_6	encrusting coralline algae	20	During	2019	Kachemak Bay	Bishop's Beach	Low	6
Post_2019_Kachemak Bay_Bishop's Beach_L_6	Fucus	0	During	2019	Kachemak Bay	Bishop's Beach	Low	6
Post_2019_Kachemak Bay_Bishop's Beach_L_6	Gloiopeltis	0	During	2019	Kachemak Bay	Bishop's Beach	Low	6
Post_2019_Kachemak Bay_Bishop's Beach_L_6	Halosaccion	0	During	2019	Kachemak Bay	Bishop's Beach	Low	6
Post_2019_Kachemak Bay_Bishop's Beach_L_6	Mastocarpus / Mazaella	0	During	2019	Kachemak Bay	Bishop's Beach	Low	6
Post_2019_Kachemak Bay_Bishop's Beach_L_6	Mytilus	0	During	2019	Kachemak Bay	Bishop's Beach	Low	6
Post_2019_Kachemak Bay_Bishop's Beach_L_6	non-coralline algal crust	0	During	2019	Kachemak Bay	Bishop's Beach	Low	6
Post_2019_Kachemak Bay_Bishop's Beach_L_6	Odonthalia / Neorhodomela	0	During	2019	Kachemak Bay	Bishop's Beach	Low	6
Post_2019_Kachemak Bay_Bishop's Beach_L_6	Savoiea / Polysiphonia	0	During	2019	Kachemak Bay	Bishop's Beach	Low	6
Post_2019_Kachemak Bay_Bishop's Beach_L_6	Ulva / Monostroma	0	During	2019	Kachemak Bay	Bishop's Beach	Low	6
Post_2019_Kachemak Bay_Bishop's Beach_L_7	Acrosiphonia	0	During	2019	Kachemak Bay	Bishop's Beach	Low	7
Post_2019_Kachemak Bay_Bishop's Beach_L_7	Alaria	5.78947	During	2019	Kachemak Bay	Bishop's Beach	Low	7
Post_2019_Kachemak Bay_Bishop's Beach_L_7	bare substrate	14.2105	During	2019	Kachemak Bay	Bishop's Beach	Low	7
Post_2019_Kachemak Bay_Bishop's Beach_L_7	barnacles	0	During	2019	Kachemak Bay	Bishop's Beach	Low	7
Post_2019_Kachemak Bay_Bishop's Beach_L_7	Boreophyllum / Pyropia / Wildemania	0	During	2019	Kachemak Bay	Bishop's Beach	Low	7
Post_2019_Kachemak Bay_Bishop's Beach_L_7	Cladophora / Chaetomorpha	0	During	2019	Kachemak Bay	Bishop's Beach	Low	7
Post_2019_Kachemak Bay_Bishop's Beach_L_7	Cryptosiphonia	0	During	2019	Kachemak Bay	Bishop's Beach	Low	7
Post_2019_Kachemak Bay_Bishop's Beach_L_7	Devaleraea / Palmaria	0	During	2019	Kachemak Bay	Bishop's Beach	Low	7
Post_2019_Kachemak Bay_Bishop's Beach_L_7	encrusting coralline algae	28.9474	During	2019	Kachemak Bay	Bishop's Beach	Low	7
Post_2019_Kachemak Bay_Bishop's Beach_L_7	Fucus	0	During	2019	Kachemak Bay	Bishop's Beach	Low	7
Post_2019_Kachemak Bay_Bishop's Beach_L_7	Gloiopeltis	0	During	2019	Kachemak Bay	Bishop's Beach	Low	7
Post_2019_Kachemak Bay_Bishop's Beach_L_7	Halosaccion	0	During	2019	Kachemak Bay	Bishop's Beach	Low	7
Post_2019_Kachemak Bay_Bishop's Beach_L_7	Mastocarpus / Mazaella	0	During	2019	Kachemak Bay	Bishop's Beach	Low	7
Post_2019_Kachemak Bay_Bishop's Beach_L_7	Mytilus	0	During	2019	Kachemak Bay	Bishop's Beach	Low	7
Post_2019_Kachemak Bay_Bishop's Beach_L_7	non-coralline algal crust	0	During	2019	Kachemak Bay	Bishop's Beach	Low	7
Post_2019_Kachemak Bay_Bishop's Beach_L_7	Odonthalia / Neorhodomela	0	During	2019	Kachemak Bay	Bishop's Beach	Low	7
Post_2019_Kachemak Bay_Bishop's Beach_L_7	Savoiea / Polysiphonia	0.526316	During	2019	Kachemak Bay	Bishop's Beach	Low	7
Post_2019_Kachemak Bay_Bishop's Beach_L_7	Ulva / Monostroma	0	During	2019	Kachemak Bay	Bishop's Beach	Low	7
Post_2019_Kachemak Bay_Bishop's Beach_L_8	Acrosiphonia	0	During	2019	Kachemak Bay	Bishop's Beach	Low	8
Post_2019_Kachemak Bay_Bishop's Beach_L_8	Alaria	5.5	During	2019	Kachemak Bay	Bishop's Beach	Low	8
Post_2019_Kachemak Bay_Bishop's Beach_L_8	bare substrate	15	During	2019	Kachemak Bay	Bishop's Beach	Low	8
Post_2019_Kachemak Bay_Bishop's Beach_L_8	barnacles	0	During	2019	Kachemak Bay	Bishop's Beach	Low	8
Post_2019_Kachemak Bay_Bishop's Beach_L_8	Boreophyllum / Pyropia / Wildemania	0	During	2019	Kachemak Bay	Bishop's Beach	Low	8
Post_2019_Kachemak Bay_Bishop's Beach_L_8	Cladophora / Chaetomorpha	0	During	2019	Kachemak Bay	Bishop's Beach	Low	8
Post_2019_Kachemak Bay_Bishop's Beach_L_8	Cryptosiphonia	0	During	2019	Kachemak Bay	Bishop's Beach	Low	8
Post_2019_Kachemak Bay_Bishop's Beach_L_8	Devaleraea / Palmaria	0	During	2019	Kachemak Bay	Bishop's Beach	Low	8
Post_2019_Kachemak Bay_Bishop's Beach_L_8	encrusting coralline algae	17.5	During	2019	Kachemak Bay	Bishop's Beach	Low	8
Post_2019_Kachemak Bay_Bishop's Beach_L_8	Fucus	0	During	2019	Kachemak Bay	Bishop's Beach	Low	8
Post_2019_Kachemak Bay_Bishop's Beach_L_8	Gloiopeltis	0	During	2019	Kachemak Bay	Bishop's Beach	Low	8
Post_2019_Kachemak Bay_Bishop's Beach_L_8	Halosaccion	0	During	2019	Kachemak Bay	Bishop's Beach	Low	8
Post_2019_Kachemak Bay_Bishop's Beach_L_8	Mastocarpus / Mazaella	0	During	2019	Kachemak Bay	Bishop's Beach	Low	8
Post_2019_Kachemak Bay_Bishop's Beach_L_8	Mytilus	0	During	2019	Kachemak Bay	Bishop's Beach	Low	8
Post_2019_Kachemak Bay_Bishop's Beach_L_8	non-coralline algal crust	0	During	2019	Kachemak Bay	Bishop's Beach	Low	8
Post_2019_Kachemak Bay_Bishop's Beach_L_8	Odonthalia / Neorhodomela	0	During	2019	Kachemak Bay	Bishop's Beach	Low	8
Post_2019_Kachemak Bay_Bishop's Beach_L_8	Savoiea / Polysiphonia	0	During	2019	Kachemak Bay	Bishop's Beach	Low	8
Post_2019_Kachemak Bay_Bishop's Beach_L_8	Ulva / Monostroma	0	During	2019	Kachemak Bay	Bishop's Beach	Low	8
Post_2019_Kachemak Bay_Bishop's Beach_L_9	Acrosiphonia	0	During	2019	Kachemak Bay	Bishop's Beach	Low	9
Post_2019_Kachemak Bay_Bishop's Beach_L_9	Alaria	10.6667	During	2019	Kachemak Bay	Bishop's Beach	Low	9
Post_2019_Kachemak Bay_Bishop's Beach_L_9	bare substrate	42	During	2019	Kachemak Bay	Bishop's Beach	Low	9
Post_2019_Kachemak Bay_Bishop's Beach_L_9	barnacles	0.666667	During	2019	Kachemak Bay	Bishop's Beach	Low	9
Post_2019_Kachemak Bay_Bishop's Beach_L_9	Boreophyllum / Pyropia / Wildemania	0	During	2019	Kachemak Bay	Bishop's Beach	Low	9
Post_2019_Kachemak Bay_Bishop's Beach_L_9	Cladophora / Chaetomorpha	0	During	2019	Kachemak Bay	Bishop's Beach	Low	9
Post_2019_Kachemak Bay_Bishop's Beach_L_9	Cryptosiphonia	0	During	2019	Kachemak Bay	Bishop's Beach	Low	9
Post_2019_Kachemak Bay_Bishop's Beach_L_9	Devaleraea / Palmaria	3.33333	During	2019	Kachemak Bay	Bishop's Beach	Low	9
Post_2019_Kachemak Bay_Bishop's Beach_L_9	encrusting coralline algae	13.3333	During	2019	Kachemak Bay	Bishop's Beach	Low	9
Post_2019_Kachemak Bay_Bishop's Beach_L_9	Fucus	0	During	2019	Kachemak Bay	Bishop's Beach	Low	9
Post_2019_Kachemak Bay_Bishop's Beach_L_9	Gloiopeltis	0	During	2019	Kachemak Bay	Bishop's Beach	Low	9
Post_2019_Kachemak Bay_Bishop's Beach_L_9	Halosaccion	0	During	2019	Kachemak Bay	Bishop's Beach	Low	9
Post_2019_Kachemak Bay_Bishop's Beach_L_9	Mastocarpus / Mazaella	0	During	2019	Kachemak Bay	Bishop's Beach	Low	9
Post_2019_Kachemak Bay_Bishop's Beach_L_9	Mytilus	0	During	2019	Kachemak Bay	Bishop's Beach	Low	9
Post_2019_Kachemak Bay_Bishop's Beach_L_9	non-coralline algal crust	0	During	2019	Kachemak Bay	Bishop's Beach	Low	9
Post_2019_Kachemak Bay_Bishop's Beach_L_9	Odonthalia / Neorhodomela	0	During	2019	Kachemak Bay	Bishop's Beach	Low	9
Post_2019_Kachemak Bay_Bishop's Beach_L_9	Savoiea / Polysiphonia	0	During	2019	Kachemak Bay	Bishop's Beach	Low	9
Post_2019_Kachemak Bay_Bishop's Beach_L_9	Ulva / Monostroma	0.666667	During	2019	Kachemak Bay	Bishop's Beach	Low	9
Post_2019_Kachemak Bay_Bishop's Beach_L_10	Acrosiphonia	0	During	2019	Kachemak Bay	Bishop's Beach	Low	10
Post_2019_Kachemak Bay_Bishop's Beach_L_10	Alaria	0	During	2019	Kachemak Bay	Bishop's Beach	Low	10
Post_2019_Kachemak Bay_Bishop's Beach_L_10	bare substrate	36.5	During	2019	Kachemak Bay	Bishop's Beach	Low	10
Post_2019_Kachemak Bay_Bishop's Beach_L_10	barnacles	1	During	2019	Kachemak Bay	Bishop's Beach	Low	10
Post_2019_Kachemak Bay_Bishop's Beach_L_10	Boreophyllum / Pyropia / Wildemania	0	During	2019	Kachemak Bay	Bishop's Beach	Low	10
Post_2019_Kachemak Bay_Bishop's Beach_L_10	Cladophora / Chaetomorpha	0	During	2019	Kachemak Bay	Bishop's Beach	Low	10
Post_2019_Kachemak Bay_Bishop's Beach_L_10	Cryptosiphonia	0	During	2019	Kachemak Bay	Bishop's Beach	Low	10
Post_2019_Kachemak Bay_Bishop's Beach_L_10	Devaleraea / Palmaria	0	During	2019	Kachemak Bay	Bishop's Beach	Low	10
Post_2019_Kachemak Bay_Bishop's Beach_L_10	encrusting coralline algae	7.5	During	2019	Kachemak Bay	Bishop's Beach	Low	10
Post_2019_Kachemak Bay_Bishop's Beach_L_10	Fucus	0	During	2019	Kachemak Bay	Bishop's Beach	Low	10
Post_2019_Kachemak Bay_Bishop's Beach_L_10	Gloiopeltis	0	During	2019	Kachemak Bay	Bishop's Beach	Low	10
Post_2019_Kachemak Bay_Bishop's Beach_L_10	Halosaccion	0	During	2019	Kachemak Bay	Bishop's Beach	Low	10
Post_2019_Kachemak Bay_Bishop's Beach_L_10	Mastocarpus / Mazaella	0	During	2019	Kachemak Bay	Bishop's Beach	Low	10
Post_2019_Kachemak Bay_Bishop's Beach_L_10	Mytilus	0	During	2019	Kachemak Bay	Bishop's Beach	Low	10
Post_2019_Kachemak Bay_Bishop's Beach_L_10	non-coralline algal crust	0	During	2019	Kachemak Bay	Bishop's Beach	Low	10
Post_2019_Kachemak Bay_Bishop's Beach_L_10	Odonthalia / Neorhodomela	0	During	2019	Kachemak Bay	Bishop's Beach	Low	10
Post_2019_Kachemak Bay_Bishop's Beach_L_10	Savoiea / Polysiphonia	0	During	2019	Kachemak Bay	Bishop's Beach	Low	10
Post_2019_Kachemak Bay_Bishop's Beach_L_10	Ulva / Monostroma	0	During	2019	Kachemak Bay	Bishop's Beach	Low	10
Pre_2012_Kachemak Bay_Bishop's Beach_M_1	Acrosiphonia	0	Before	2012	Kachemak Bay	Bishop's Beach	Mid	1
Pre_2012_Kachemak Bay_Bishop's Beach_M_1	Alaria	0	Before	2012	Kachemak Bay	Bishop's Beach	Mid	1
Pre_2012_Kachemak Bay_Bishop's Beach_M_1	bare substrate	35	Before	2012	Kachemak Bay	Bishop's Beach	Mid	1
Pre_2012_Kachemak Bay_Bishop's Beach_M_1	barnacles	20	Before	2012	Kachemak Bay	Bishop's Beach	Mid	1
Pre_2012_Kachemak Bay_Bishop's Beach_M_1	Boreophyllum / Pyropia / Wildemania	0	Before	2012	Kachemak Bay	Bishop's Beach	Mid	1
Pre_2012_Kachemak Bay_Bishop's Beach_M_1	Cladophora / Chaetomorpha	0	Before	2012	Kachemak Bay	Bishop's Beach	Mid	1
Pre_2012_Kachemak Bay_Bishop's Beach_M_1	Cryptosiphonia	0	Before	2012	Kachemak Bay	Bishop's Beach	Mid	1
Pre_2012_Kachemak Bay_Bishop's Beach_M_1	Devaleraea / Palmaria	20	Before	2012	Kachemak Bay	Bishop's Beach	Mid	1
Pre_2012_Kachemak Bay_Bishop's Beach_M_1	encrusting coralline algae	0	Before	2012	Kachemak Bay	Bishop's Beach	Mid	1
Pre_2012_Kachemak Bay_Bishop's Beach_M_1	Fucus	20	Before	2012	Kachemak Bay	Bishop's Beach	Mid	1
Pre_2012_Kachemak Bay_Bishop's Beach_M_1	Gloiopeltis	0	Before	2012	Kachemak Bay	Bishop's Beach	Mid	1
Pre_2012_Kachemak Bay_Bishop's Beach_M_1	Halosaccion	0	Before	2012	Kachemak Bay	Bishop's Beach	Mid	1
Pre_2012_Kachemak Bay_Bishop's Beach_M_1	Mastocarpus / Mazaella	0	Before	2012	Kachemak Bay	Bishop's Beach	Mid	1
Pre_2012_Kachemak Bay_Bishop's Beach_M_1	Mytilus	0	Before	2012	Kachemak Bay	Bishop's Beach	Mid	1
Pre_2012_Kachemak Bay_Bishop's Beach_M_1	non-coralline algal crust	0	Before	2012	Kachemak Bay	Bishop's Beach	Mid	1
Pre_2012_Kachemak Bay_Bishop's Beach_M_1	Odonthalia / Neorhodomela	0	Before	2012	Kachemak Bay	Bishop's Beach	Mid	1
Pre_2012_Kachemak Bay_Bishop's Beach_M_1	Savoiea / Polysiphonia	0	Before	2012	Kachemak Bay	Bishop's Beach	Mid	1
Pre_2012_Kachemak Bay_Bishop's Beach_M_1	Ulva / Monostroma	0	Before	2012	Kachemak Bay	Bishop's Beach	Mid	1
Pre_2012_Kachemak Bay_Bishop's Beach_M_2	Acrosiphonia	0	Before	2012	Kachemak Bay	Bishop's Beach	Mid	2
Pre_2012_Kachemak Bay_Bishop's Beach_M_2	Alaria	0	Before	2012	Kachemak Bay	Bishop's Beach	Mid	2
Pre_2012_Kachemak Bay_Bishop's Beach_M_2	bare substrate	100	Before	2012	Kachemak Bay	Bishop's Beach	Mid	2
Pre_2012_Kachemak Bay_Bishop's Beach_M_2	barnacles	0	Before	2012	Kachemak Bay	Bishop's Beach	Mid	2
Pre_2012_Kachemak Bay_Bishop's Beach_M_2	Boreophyllum / Pyropia / Wildemania	0	Before	2012	Kachemak Bay	Bishop's Beach	Mid	2
Pre_2012_Kachemak Bay_Bishop's Beach_M_2	Cladophora / Chaetomorpha	0	Before	2012	Kachemak Bay	Bishop's Beach	Mid	2
Pre_2012_Kachemak Bay_Bishop's Beach_M_2	Cryptosiphonia	0	Before	2012	Kachemak Bay	Bishop's Beach	Mid	2
Pre_2012_Kachemak Bay_Bishop's Beach_M_2	Devaleraea / Palmaria	0	Before	2012	Kachemak Bay	Bishop's Beach	Mid	2
Pre_2012_Kachemak Bay_Bishop's Beach_M_2	encrusting coralline algae	0	Before	2012	Kachemak Bay	Bishop's Beach	Mid	2
Pre_2012_Kachemak Bay_Bishop's Beach_M_2	Fucus	0	Before	2012	Kachemak Bay	Bishop's Beach	Mid	2
Pre_2012_Kachemak Bay_Bishop's Beach_M_2	Gloiopeltis	0	Before	2012	Kachemak Bay	Bishop's Beach	Mid	2
Pre_2012_Kachemak Bay_Bishop's Beach_M_2	Halosaccion	0	Before	2012	Kachemak Bay	Bishop's Beach	Mid	2
Pre_2012_Kachemak Bay_Bishop's Beach_M_2	Mastocarpus / Mazaella	0	Before	2012	Kachemak Bay	Bishop's Beach	Mid	2
Pre_2012_Kachemak Bay_Bishop's Beach_M_2	Mytilus	0	Before	2012	Kachemak Bay	Bishop's Beach	Mid	2
Pre_2012_Kachemak Bay_Bishop's Beach_M_2	non-coralline algal crust	0	Before	2012	Kachemak Bay	Bishop's Beach	Mid	2
Pre_2012_Kachemak Bay_Bishop's Beach_M_2	Odonthalia / Neorhodomela	0	Before	2012	Kachemak Bay	Bishop's Beach	Mid	2
Pre_2012_Kachemak Bay_Bishop's Beach_M_2	Savoiea / Polysiphonia	0	Before	2012	Kachemak Bay	Bishop's Beach	Mid	2
Pre_2012_Kachemak Bay_Bishop's Beach_M_2	Ulva / Monostroma	0	Before	2012	Kachemak Bay	Bishop's Beach	Mid	2
Pre_2012_Kachemak Bay_Bishop's Beach_M_3	Acrosiphonia	0	Before	2012	Kachemak Bay	Bishop's Beach	Mid	3
Pre_2012_Kachemak Bay_Bishop's Beach_M_3	Alaria	0	Before	2012	Kachemak Bay	Bishop's Beach	Mid	3
Pre_2012_Kachemak Bay_Bishop's Beach_M_3	bare substrate	95	Before	2012	Kachemak Bay	Bishop's Beach	Mid	3
Pre_2012_Kachemak Bay_Bishop's Beach_M_3	barnacles	0	Before	2012	Kachemak Bay	Bishop's Beach	Mid	3
Pre_2012_Kachemak Bay_Bishop's Beach_M_3	Boreophyllum / Pyropia / Wildemania	0	Before	2012	Kachemak Bay	Bishop's Beach	Mid	3
Pre_2012_Kachemak Bay_Bishop's Beach_M_3	Cladophora / Chaetomorpha	0	Before	2012	Kachemak Bay	Bishop's Beach	Mid	3
Pre_2012_Kachemak Bay_Bishop's Beach_M_3	Cryptosiphonia	0	Before	2012	Kachemak Bay	Bishop's Beach	Mid	3
Pre_2012_Kachemak Bay_Bishop's Beach_M_3	Devaleraea / Palmaria	0	Before	2012	Kachemak Bay	Bishop's Beach	Mid	3
Pre_2012_Kachemak Bay_Bishop's Beach_M_3	encrusting coralline algae	0	Before	2012	Kachemak Bay	Bishop's Beach	Mid	3
Pre_2012_Kachemak Bay_Bishop's Beach_M_3	Fucus	0	Before	2012	Kachemak Bay	Bishop's Beach	Mid	3
Pre_2012_Kachemak Bay_Bishop's Beach_M_3	Gloiopeltis	0	Before	2012	Kachemak Bay	Bishop's Beach	Mid	3
Pre_2012_Kachemak Bay_Bishop's Beach_M_3	Halosaccion	0	Before	2012	Kachemak Bay	Bishop's Beach	Mid	3
Pre_2012_Kachemak Bay_Bishop's Beach_M_3	Mastocarpus / Mazaella	0	Before	2012	Kachemak Bay	Bishop's Beach	Mid	3
Pre_2012_Kachemak Bay_Bishop's Beach_M_3	Mytilus	0	Before	2012	Kachemak Bay	Bishop's Beach	Mid	3
Pre_2012_Kachemak Bay_Bishop's Beach_M_3	non-coralline algal crust	0	Before	2012	Kachemak Bay	Bishop's Beach	Mid	3
Pre_2012_Kachemak Bay_Bishop's Beach_M_3	Odonthalia / Neorhodomela	0	Before	2012	Kachemak Bay	Bishop's Beach	Mid	3
Pre_2012_Kachemak Bay_Bishop's Beach_M_3	Savoiea / Polysiphonia	0	Before	2012	Kachemak Bay	Bishop's Beach	Mid	3
Pre_2012_Kachemak Bay_Bishop's Beach_M_3	Ulva / Monostroma	0	Before	2012	Kachemak Bay	Bishop's Beach	Mid	3
Pre_2012_Kachemak Bay_Bishop's Beach_M_4	Acrosiphonia	0	Before	2012	Kachemak Bay	Bishop's Beach	Mid	4
Pre_2012_Kachemak Bay_Bishop's Beach_M_4	Alaria	0	Before	2012	Kachemak Bay	Bishop's Beach	Mid	4
Pre_2012_Kachemak Bay_Bishop's Beach_M_4	bare substrate	99	Before	2012	Kachemak Bay	Bishop's Beach	Mid	4
Pre_2012_Kachemak Bay_Bishop's Beach_M_4	barnacles	0	Before	2012	Kachemak Bay	Bishop's Beach	Mid	4
Pre_2012_Kachemak Bay_Bishop's Beach_M_4	Boreophyllum / Pyropia / Wildemania	0	Before	2012	Kachemak Bay	Bishop's Beach	Mid	4
Pre_2012_Kachemak Bay_Bishop's Beach_M_4	Cladophora / Chaetomorpha	0	Before	2012	Kachemak Bay	Bishop's Beach	Mid	4
Pre_2012_Kachemak Bay_Bishop's Beach_M_4	Cryptosiphonia	0	Before	2012	Kachemak Bay	Bishop's Beach	Mid	4
Pre_2012_Kachemak Bay_Bishop's Beach_M_4	Devaleraea / Palmaria	0	Before	2012	Kachemak Bay	Bishop's Beach	Mid	4
Pre_2012_Kachemak Bay_Bishop's Beach_M_4	encrusting coralline algae	0	Before	2012	Kachemak Bay	Bishop's Beach	Mid	4
Pre_2012_Kachemak Bay_Bishop's Beach_M_4	Fucus	0	Before	2012	Kachemak Bay	Bishop's Beach	Mid	4
Pre_2012_Kachemak Bay_Bishop's Beach_M_4	Gloiopeltis	0	Before	2012	Kachemak Bay	Bishop's Beach	Mid	4
Pre_2012_Kachemak Bay_Bishop's Beach_M_4	Halosaccion	0	Before	2012	Kachemak Bay	Bishop's Beach	Mid	4
Pre_2012_Kachemak Bay_Bishop's Beach_M_4	Mastocarpus / Mazaella	0	Before	2012	Kachemak Bay	Bishop's Beach	Mid	4
Pre_2012_Kachemak Bay_Bishop's Beach_M_4	Mytilus	0	Before	2012	Kachemak Bay	Bishop's Beach	Mid	4
Pre_2012_Kachemak Bay_Bishop's Beach_M_4	non-coralline algal crust	0	Before	2012	Kachemak Bay	Bishop's Beach	Mid	4
Pre_2012_Kachemak Bay_Bishop's Beach_M_4	Odonthalia / Neorhodomela	0	Before	2012	Kachemak Bay	Bishop's Beach	Mid	4
Pre_2012_Kachemak Bay_Bishop's Beach_M_4	Savoiea / Polysiphonia	0	Before	2012	Kachemak Bay	Bishop's Beach	Mid	4
Pre_2012_Kachemak Bay_Bishop's Beach_M_4	Ulva / Monostroma	0	Before	2012	Kachemak Bay	Bishop's Beach	Mid	4
Pre_2012_Kachemak Bay_Bishop's Beach_M_5	Acrosiphonia	2	Before	2012	Kachemak Bay	Bishop's Beach	Mid	5
Pre_2012_Kachemak Bay_Bishop's Beach_M_5	Alaria	0	Before	2012	Kachemak Bay	Bishop's Beach	Mid	5
Pre_2012_Kachemak Bay_Bishop's Beach_M_5	bare substrate	70	Before	2012	Kachemak Bay	Bishop's Beach	Mid	5
Pre_2012_Kachemak Bay_Bishop's Beach_M_5	barnacles	0	Before	2012	Kachemak Bay	Bishop's Beach	Mid	5
Pre_2012_Kachemak Bay_Bishop's Beach_M_5	Boreophyllum / Pyropia / Wildemania	0	Before	2012	Kachemak Bay	Bishop's Beach	Mid	5
Pre_2012_Kachemak Bay_Bishop's Beach_M_5	Cladophora / Chaetomorpha	0	Before	2012	Kachemak Bay	Bishop's Beach	Mid	5
Pre_2012_Kachemak Bay_Bishop's Beach_M_5	Cryptosiphonia	0	Before	2012	Kachemak Bay	Bishop's Beach	Mid	5
Pre_2012_Kachemak Bay_Bishop's Beach_M_5	Devaleraea / Palmaria	0	Before	2012	Kachemak Bay	Bishop's Beach	Mid	5
Pre_2012_Kachemak Bay_Bishop's Beach_M_5	encrusting coralline algae	0	Before	2012	Kachemak Bay	Bishop's Beach	Mid	5
Pre_2012_Kachemak Bay_Bishop's Beach_M_5	Fucus	18	Before	2012	Kachemak Bay	Bishop's Beach	Mid	5
Pre_2012_Kachemak Bay_Bishop's Beach_M_5	Gloiopeltis	0	Before	2012	Kachemak Bay	Bishop's Beach	Mid	5
Pre_2012_Kachemak Bay_Bishop's Beach_M_5	Halosaccion	0	Before	2012	Kachemak Bay	Bishop's Beach	Mid	5
Pre_2012_Kachemak Bay_Bishop's Beach_M_5	Mastocarpus / Mazaella	0	Before	2012	Kachemak Bay	Bishop's Beach	Mid	5
Pre_2012_Kachemak Bay_Bishop's Beach_M_5	Mytilus	0	Before	2012	Kachemak Bay	Bishop's Beach	Mid	5
Pre_2012_Kachemak Bay_Bishop's Beach_M_5	non-coralline algal crust	0	Before	2012	Kachemak Bay	Bishop's Beach	Mid	5
Pre_2012_Kachemak Bay_Bishop's Beach_M_5	Odonthalia / Neorhodomela	0	Before	2012	Kachemak Bay	Bishop's Beach	Mid	5
Pre_2012_Kachemak Bay_Bishop's Beach_M_5	Savoiea / Polysiphonia	0	Before	2012	Kachemak Bay	Bishop's Beach	Mid	5
Pre_2012_Kachemak Bay_Bishop's Beach_M_5	Ulva / Monostroma	0	Before	2012	Kachemak Bay	Bishop's Beach	Mid	5
Pre_2012_Kachemak Bay_Bishop's Beach_M_6	Acrosiphonia	5	Before	2012	Kachemak Bay	Bishop's Beach	Mid	6
Pre_2012_Kachemak Bay_Bishop's Beach_M_6	Alaria	0	Before	2012	Kachemak Bay	Bishop's Beach	Mid	6
Pre_2012_Kachemak Bay_Bishop's Beach_M_6	bare substrate	30	Before	2012	Kachemak Bay	Bishop's Beach	Mid	6
Pre_2012_Kachemak Bay_Bishop's Beach_M_6	barnacles	14	Before	2012	Kachemak Bay	Bishop's Beach	Mid	6
Pre_2012_Kachemak Bay_Bishop's Beach_M_6	Boreophyllum / Pyropia / Wildemania	0	Before	2012	Kachemak Bay	Bishop's Beach	Mid	6
Pre_2012_Kachemak Bay_Bishop's Beach_M_6	Cladophora / Chaetomorpha	0	Before	2012	Kachemak Bay	Bishop's Beach	Mid	6
Pre_2012_Kachemak Bay_Bishop's Beach_M_6	Cryptosiphonia	0	Before	2012	Kachemak Bay	Bishop's Beach	Mid	6
Pre_2012_Kachemak Bay_Bishop's Beach_M_6	Devaleraea / Palmaria	25	Before	2012	Kachemak Bay	Bishop's Beach	Mid	6
Pre_2012_Kachemak Bay_Bishop's Beach_M_6	encrusting coralline algae	0	Before	2012	Kachemak Bay	Bishop's Beach	Mid	6
Pre_2012_Kachemak Bay_Bishop's Beach_M_6	Fucus	10	Before	2012	Kachemak Bay	Bishop's Beach	Mid	6
Pre_2012_Kachemak Bay_Bishop's Beach_M_6	Gloiopeltis	0	Before	2012	Kachemak Bay	Bishop's Beach	Mid	6
Pre_2012_Kachemak Bay_Bishop's Beach_M_6	Halosaccion	0	Before	2012	Kachemak Bay	Bishop's Beach	Mid	6
Pre_2012_Kachemak Bay_Bishop's Beach_M_6	Mastocarpus / Mazaella	0	Before	2012	Kachemak Bay	Bishop's Beach	Mid	6
Pre_2012_Kachemak Bay_Bishop's Beach_M_6	Mytilus	0	Before	2012	Kachemak Bay	Bishop's Beach	Mid	6
Pre_2012_Kachemak Bay_Bishop's Beach_M_6	non-coralline algal crust	0	Before	2012	Kachemak Bay	Bishop's Beach	Mid	6
Pre_2012_Kachemak Bay_Bishop's Beach_M_6	Odonthalia / Neorhodomela	0	Before	2012	Kachemak Bay	Bishop's Beach	Mid	6
Pre_2012_Kachemak Bay_Bishop's Beach_M_6	Savoiea / Polysiphonia	5	Before	2012	Kachemak Bay	Bishop's Beach	Mid	6
Pre_2012_Kachemak Bay_Bishop's Beach_M_6	Ulva / Monostroma	1	Before	2012	Kachemak Bay	Bishop's Beach	Mid	6
Pre_2012_Kachemak Bay_Bishop's Beach_M_7	Acrosiphonia	5	Before	2012	Kachemak Bay	Bishop's Beach	Mid	7
Pre_2012_Kachemak Bay_Bishop's Beach_M_7	Alaria	0	Before	2012	Kachemak Bay	Bishop's Beach	Mid	7
Pre_2012_Kachemak Bay_Bishop's Beach_M_7	bare substrate	40	Before	2012	Kachemak Bay	Bishop's Beach	Mid	7
Pre_2012_Kachemak Bay_Bishop's Beach_M_7	barnacles	20	Before	2012	Kachemak Bay	Bishop's Beach	Mid	7
Pre_2012_Kachemak Bay_Bishop's Beach_M_7	Boreophyllum / Pyropia / Wildemania	0	Before	2012	Kachemak Bay	Bishop's Beach	Mid	7
Pre_2012_Kachemak Bay_Bishop's Beach_M_7	Cladophora / Chaetomorpha	0	Before	2012	Kachemak Bay	Bishop's Beach	Mid	7
Pre_2012_Kachemak Bay_Bishop's Beach_M_7	Cryptosiphonia	0	Before	2012	Kachemak Bay	Bishop's Beach	Mid	7
Pre_2012_Kachemak Bay_Bishop's Beach_M_7	Devaleraea / Palmaria	20	Before	2012	Kachemak Bay	Bishop's Beach	Mid	7
Pre_2012_Kachemak Bay_Bishop's Beach_M_7	encrusting coralline algae	0	Before	2012	Kachemak Bay	Bishop's Beach	Mid	7
Pre_2012_Kachemak Bay_Bishop's Beach_M_7	Fucus	5	Before	2012	Kachemak Bay	Bishop's Beach	Mid	7
Pre_2012_Kachemak Bay_Bishop's Beach_M_7	Gloiopeltis	0	Before	2012	Kachemak Bay	Bishop's Beach	Mid	7
Pre_2012_Kachemak Bay_Bishop's Beach_M_7	Halosaccion	0	Before	2012	Kachemak Bay	Bishop's Beach	Mid	7
Pre_2012_Kachemak Bay_Bishop's Beach_M_7	Mastocarpus / Mazaella	0	Before	2012	Kachemak Bay	Bishop's Beach	Mid	7
Pre_2012_Kachemak Bay_Bishop's Beach_M_7	Mytilus	0	Before	2012	Kachemak Bay	Bishop's Beach	Mid	7
Pre_2012_Kachemak Bay_Bishop's Beach_M_7	non-coralline algal crust	0	Before	2012	Kachemak Bay	Bishop's Beach	Mid	7
Pre_2012_Kachemak Bay_Bishop's Beach_M_7	Odonthalia / Neorhodomela	0	Before	2012	Kachemak Bay	Bishop's Beach	Mid	7
Pre_2012_Kachemak Bay_Bishop's Beach_M_7	Savoiea / Polysiphonia	0	Before	2012	Kachemak Bay	Bishop's Beach	Mid	7
Pre_2012_Kachemak Bay_Bishop's Beach_M_7	Ulva / Monostroma	5	Before	2012	Kachemak Bay	Bishop's Beach	Mid	7
Pre_2012_Kachemak Bay_Bishop's Beach_M_8	Acrosiphonia	0	Before	2012	Kachemak Bay	Bishop's Beach	Mid	8
Pre_2012_Kachemak Bay_Bishop's Beach_M_8	Alaria	0	Before	2012	Kachemak Bay	Bishop's Beach	Mid	8
Pre_2012_Kachemak Bay_Bishop's Beach_M_8	bare substrate	100	Before	2012	Kachemak Bay	Bishop's Beach	Mid	8
Pre_2012_Kachemak Bay_Bishop's Beach_M_8	barnacles	0	Before	2012	Kachemak Bay	Bishop's Beach	Mid	8
Pre_2012_Kachemak Bay_Bishop's Beach_M_8	Boreophyllum / Pyropia / Wildemania	0	Before	2012	Kachemak Bay	Bishop's Beach	Mid	8
Pre_2012_Kachemak Bay_Bishop's Beach_M_8	Cladophora / Chaetomorpha	0	Before	2012	Kachemak Bay	Bishop's Beach	Mid	8
Pre_2012_Kachemak Bay_Bishop's Beach_M_8	Cryptosiphonia	0	Before	2012	Kachemak Bay	Bishop's Beach	Mid	8
Pre_2012_Kachemak Bay_Bishop's Beach_M_8	Devaleraea / Palmaria	0	Before	2012	Kachemak Bay	Bishop's Beach	Mid	8
Pre_2012_Kachemak Bay_Bishop's Beach_M_8	encrusting coralline algae	0	Before	2012	Kachemak Bay	Bishop's Beach	Mid	8
Pre_2012_Kachemak Bay_Bishop's Beach_M_8	Fucus	0	Before	2012	Kachemak Bay	Bishop's Beach	Mid	8
Pre_2012_Kachemak Bay_Bishop's Beach_M_8	Gloiopeltis	0	Before	2012	Kachemak Bay	Bishop's Beach	Mid	8
Pre_2012_Kachemak Bay_Bishop's Beach_M_8	Halosaccion	0	Before	2012	Kachemak Bay	Bishop's Beach	Mid	8
Pre_2012_Kachemak Bay_Bishop's Beach_M_8	Mastocarpus / Mazaella	0	Before	2012	Kachemak Bay	Bishop's Beach	Mid	8
Pre_2012_Kachemak Bay_Bishop's Beach_M_8	Mytilus	0	Before	2012	Kachemak Bay	Bishop's Beach	Mid	8
Pre_2012_Kachemak Bay_Bishop's Beach_M_8	non-coralline algal crust	0	Before	2012	Kachemak Bay	Bishop's Beach	Mid	8
Pre_2012_Kachemak Bay_Bishop's Beach_M_8	Odonthalia / Neorhodomela	0	Before	2012	Kachemak Bay	Bishop's Beach	Mid	8
Pre_2012_Kachemak Bay_Bishop's Beach_M_8	Savoiea / Polysiphonia	0	Before	2012	Kachemak Bay	Bishop's Beach	Mid	8
Pre_2012_Kachemak Bay_Bishop's Beach_M_8	Ulva / Monostroma	0	Before	2012	Kachemak Bay	Bishop's Beach	Mid	8
Pre_2012_Kachemak Bay_Bishop's Beach_M_9	Acrosiphonia	5	Before	2012	Kachemak Bay	Bishop's Beach	Mid	9
Pre_2012_Kachemak Bay_Bishop's Beach_M_9	Alaria	0	Before	2012	Kachemak Bay	Bishop's Beach	Mid	9
Pre_2012_Kachemak Bay_Bishop's Beach_M_9	bare substrate	10	Before	2012	Kachemak Bay	Bishop's Beach	Mid	9
Pre_2012_Kachemak Bay_Bishop's Beach_M_9	barnacles	50	Before	2012	Kachemak Bay	Bishop's Beach	Mid	9
Pre_2012_Kachemak Bay_Bishop's Beach_M_9	Boreophyllum / Pyropia / Wildemania	0	Before	2012	Kachemak Bay	Bishop's Beach	Mid	9
Pre_2012_Kachemak Bay_Bishop's Beach_M_9	Cladophora / Chaetomorpha	0	Before	2012	Kachemak Bay	Bishop's Beach	Mid	9
Pre_2012_Kachemak Bay_Bishop's Beach_M_9	Cryptosiphonia	0	Before	2012	Kachemak Bay	Bishop's Beach	Mid	9
Pre_2012_Kachemak Bay_Bishop's Beach_M_9	Devaleraea / Palmaria	5	Before	2012	Kachemak Bay	Bishop's Beach	Mid	9
Pre_2012_Kachemak Bay_Bishop's Beach_M_9	encrusting coralline algae	0	Before	2012	Kachemak Bay	Bishop's Beach	Mid	9
Pre_2012_Kachemak Bay_Bishop's Beach_M_9	Fucus	5	Before	2012	Kachemak Bay	Bishop's Beach	Mid	9
Pre_2012_Kachemak Bay_Bishop's Beach_M_9	Gloiopeltis	0	Before	2012	Kachemak Bay	Bishop's Beach	Mid	9
Pre_2012_Kachemak Bay_Bishop's Beach_M_9	Halosaccion	0	Before	2012	Kachemak Bay	Bishop's Beach	Mid	9
Pre_2012_Kachemak Bay_Bishop's Beach_M_9	Mastocarpus / Mazaella	0	Before	2012	Kachemak Bay	Bishop's Beach	Mid	9
Pre_2012_Kachemak Bay_Bishop's Beach_M_9	Mytilus	10	Before	2012	Kachemak Bay	Bishop's Beach	Mid	9
Pre_2012_Kachemak Bay_Bishop's Beach_M_9	non-coralline algal crust	0	Before	2012	Kachemak Bay	Bishop's Beach	Mid	9
Pre_2012_Kachemak Bay_Bishop's Beach_M_9	Odonthalia / Neorhodomela	0	Before	2012	Kachemak Bay	Bishop's Beach	Mid	9
Pre_2012_Kachemak Bay_Bishop's Beach_M_9	Savoiea / Polysiphonia	0	Before	2012	Kachemak Bay	Bishop's Beach	Mid	9
Pre_2012_Kachemak Bay_Bishop's Beach_M_9	Ulva / Monostroma	10	Before	2012	Kachemak Bay	Bishop's Beach	Mid	9
Pre_2012_Kachemak Bay_Bishop's Beach_M_10	Acrosiphonia	0	Before	2012	Kachemak Bay	Bishop's Beach	Mid	10
Pre_2012_Kachemak Bay_Bishop's Beach_M_10	Alaria	0	Before	2012	Kachemak Bay	Bishop's Beach	Mid	10
Pre_2012_Kachemak Bay_Bishop's Beach_M_10	bare substrate	100	Before	2012	Kachemak Bay	Bishop's Beach	Mid	10
Pre_2012_Kachemak Bay_Bishop's Beach_M_10	barnacles	0	Before	2012	Kachemak Bay	Bishop's Beach	Mid	10
Pre_2012_Kachemak Bay_Bishop's Beach_M_10	Boreophyllum / Pyropia / Wildemania	0	Before	2012	Kachemak Bay	Bishop's Beach	Mid	10
Pre_2012_Kachemak Bay_Bishop's Beach_M_10	Cladophora / Chaetomorpha	0	Before	2012	Kachemak Bay	Bishop's Beach	Mid	10
Pre_2012_Kachemak Bay_Bishop's Beach_M_10	Cryptosiphonia	0	Before	2012	Kachemak Bay	Bishop's Beach	Mid	10
Pre_2012_Kachemak Bay_Bishop's Beach_M_10	Devaleraea / Palmaria	0	Before	2012	Kachemak Bay	Bishop's Beach	Mid	10
Pre_2012_Kachemak Bay_Bishop's Beach_M_10	encrusting coralline algae	0	Before	2012	Kachemak Bay	Bishop's Beach	Mid	10
Pre_2012_Kachemak Bay_Bishop's Beach_M_10	Fucus	0	Before	2012	Kachemak Bay	Bishop's Beach	Mid	10
Pre_2012_Kachemak Bay_Bishop's Beach_M_10	Gloiopeltis	0	Before	2012	Kachemak Bay	Bishop's Beach	Mid	10
Pre_2012_Kachemak Bay_Bishop's Beach_M_10	Halosaccion	0	Before	2012	Kachemak Bay	Bishop's Beach	Mid	10
Pre_2012_Kachemak Bay_Bishop's Beach_M_10	Mastocarpus / Mazaella	0	Before	2012	Kachemak Bay	Bishop's Beach	Mid	10
Pre_2012_Kachemak Bay_Bishop's Beach_M_10	Mytilus	0	Before	2012	Kachemak Bay	Bishop's Beach	Mid	10
Pre_2012_Kachemak Bay_Bishop's Beach_M_10	non-coralline algal crust	0	Before	2012	Kachemak Bay	Bishop's Beach	Mid	10
Pre_2012_Kachemak Bay_Bishop's Beach_M_10	Odonthalia / Neorhodomela	0	Before	2012	Kachemak Bay	Bishop's Beach	Mid	10
Pre_2012_Kachemak Bay_Bishop's Beach_M_10	Savoiea / Polysiphonia	0	Before	2012	Kachemak Bay	Bishop's Beach	Mid	10
Pre_2012_Kachemak Bay_Bishop's Beach_M_10	Ulva / Monostroma	0	Before	2012	Kachemak Bay	Bishop's Beach	Mid	10
Pre_2013_Kachemak Bay_Bishop's Beach_M_1	Acrosiphonia	0	Before	2013	Kachemak Bay	Bishop's Beach	Mid	1
Pre_2013_Kachemak Bay_Bishop's Beach_M_1	Alaria	0	Before	2013	Kachemak Bay	Bishop's Beach	Mid	1
Pre_2013_Kachemak Bay_Bishop's Beach_M_1	bare substrate	65.6566	Before	2013	Kachemak Bay	Bishop's Beach	Mid	1
Pre_2013_Kachemak Bay_Bishop's Beach_M_1	barnacles	0	Before	2013	Kachemak Bay	Bishop's Beach	Mid	1
Pre_2013_Kachemak Bay_Bishop's Beach_M_1	Boreophyllum / Pyropia / Wildemania	0	Before	2013	Kachemak Bay	Bishop's Beach	Mid	1
Pre_2013_Kachemak Bay_Bishop's Beach_M_1	Cladophora / Chaetomorpha	1.0101	Before	2013	Kachemak Bay	Bishop's Beach	Mid	1
Pre_2013_Kachemak Bay_Bishop's Beach_M_1	Cryptosiphonia	2.0202	Before	2013	Kachemak Bay	Bishop's Beach	Mid	1
Pre_2013_Kachemak Bay_Bishop's Beach_M_1	Devaleraea / Palmaria	0	Before	2013	Kachemak Bay	Bishop's Beach	Mid	1
Pre_2013_Kachemak Bay_Bishop's Beach_M_1	encrusting coralline algae	0	Before	2013	Kachemak Bay	Bishop's Beach	Mid	1
Pre_2013_Kachemak Bay_Bishop's Beach_M_1	Fucus	20.202	Before	2013	Kachemak Bay	Bishop's Beach	Mid	1
Pre_2013_Kachemak Bay_Bishop's Beach_M_1	Gloiopeltis	0	Before	2013	Kachemak Bay	Bishop's Beach	Mid	1
Pre_2013_Kachemak Bay_Bishop's Beach_M_1	Halosaccion	0	Before	2013	Kachemak Bay	Bishop's Beach	Mid	1
Pre_2013_Kachemak Bay_Bishop's Beach_M_1	Mastocarpus / Mazaella	0	Before	2013	Kachemak Bay	Bishop's Beach	Mid	1
Pre_2013_Kachemak Bay_Bishop's Beach_M_1	Mytilus	0	Before	2013	Kachemak Bay	Bishop's Beach	Mid	1
Pre_2013_Kachemak Bay_Bishop's Beach_M_1	non-coralline algal crust	0	Before	2013	Kachemak Bay	Bishop's Beach	Mid	1
Pre_2013_Kachemak Bay_Bishop's Beach_M_1	Odonthalia / Neorhodomela	5.05051	Before	2013	Kachemak Bay	Bishop's Beach	Mid	1
Pre_2013_Kachemak Bay_Bishop's Beach_M_1	Savoiea / Polysiphonia	0	Before	2013	Kachemak Bay	Bishop's Beach	Mid	1
Pre_2013_Kachemak Bay_Bishop's Beach_M_1	Ulva / Monostroma	2.0202	Before	2013	Kachemak Bay	Bishop's Beach	Mid	1
Pre_2013_Kachemak Bay_Bishop's Beach_M_2	Acrosiphonia	0	Before	2013	Kachemak Bay	Bishop's Beach	Mid	2
Pre_2013_Kachemak Bay_Bishop's Beach_M_2	Alaria	0	Before	2013	Kachemak Bay	Bishop's Beach	Mid	2
Pre_2013_Kachemak Bay_Bishop's Beach_M_2	bare substrate	100	Before	2013	Kachemak Bay	Bishop's Beach	Mid	2
Pre_2013_Kachemak Bay_Bishop's Beach_M_2	barnacles	0	Before	2013	Kachemak Bay	Bishop's Beach	Mid	2
Pre_2013_Kachemak Bay_Bishop's Beach_M_2	Boreophyllum / Pyropia / Wildemania	0	Before	2013	Kachemak Bay	Bishop's Beach	Mid	2
Pre_2013_Kachemak Bay_Bishop's Beach_M_2	Cladophora / Chaetomorpha	0	Before	2013	Kachemak Bay	Bishop's Beach	Mid	2
Pre_2013_Kachemak Bay_Bishop's Beach_M_2	Cryptosiphonia	0	Before	2013	Kachemak Bay	Bishop's Beach	Mid	2
Pre_2013_Kachemak Bay_Bishop's Beach_M_2	Devaleraea / Palmaria	0	Before	2013	Kachemak Bay	Bishop's Beach	Mid	2
Pre_2013_Kachemak Bay_Bishop's Beach_M_2	encrusting coralline algae	0	Before	2013	Kachemak Bay	Bishop's Beach	Mid	2
Pre_2013_Kachemak Bay_Bishop's Beach_M_2	Fucus	0	Before	2013	Kachemak Bay	Bishop's Beach	Mid	2
Pre_2013_Kachemak Bay_Bishop's Beach_M_2	Gloiopeltis	0	Before	2013	Kachemak Bay	Bishop's Beach	Mid	2
Pre_2013_Kachemak Bay_Bishop's Beach_M_2	Halosaccion	0	Before	2013	Kachemak Bay	Bishop's Beach	Mid	2
Pre_2013_Kachemak Bay_Bishop's Beach_M_2	Mastocarpus / Mazaella	0	Before	2013	Kachemak Bay	Bishop's Beach	Mid	2
Pre_2013_Kachemak Bay_Bishop's Beach_M_2	Mytilus	0	Before	2013	Kachemak Bay	Bishop's Beach	Mid	2
Pre_2013_Kachemak Bay_Bishop's Beach_M_2	non-coralline algal crust	0	Before	2013	Kachemak Bay	Bishop's Beach	Mid	2
Pre_2013_Kachemak Bay_Bishop's Beach_M_2	Odonthalia / Neorhodomela	0	Before	2013	Kachemak Bay	Bishop's Beach	Mid	2
Pre_2013_Kachemak Bay_Bishop's Beach_M_2	Savoiea / Polysiphonia	0	Before	2013	Kachemak Bay	Bishop's Beach	Mid	2
Pre_2013_Kachemak Bay_Bishop's Beach_M_2	Ulva / Monostroma	0	Before	2013	Kachemak Bay	Bishop's Beach	Mid	2
Pre_2013_Kachemak Bay_Bishop's Beach_M_3	Acrosiphonia	0	Before	2013	Kachemak Bay	Bishop's Beach	Mid	3
Pre_2013_Kachemak Bay_Bishop's Beach_M_3	Alaria	0	Before	2013	Kachemak Bay	Bishop's Beach	Mid	3
Pre_2013_Kachemak Bay_Bishop's Beach_M_3	bare substrate	94	Before	2013	Kachemak Bay	Bishop's Beach	Mid	3
Pre_2013_Kachemak Bay_Bishop's Beach_M_3	barnacles	1	Before	2013	Kachemak Bay	Bishop's Beach	Mid	3
Pre_2013_Kachemak Bay_Bishop's Beach_M_3	Boreophyllum / Pyropia / Wildemania	0	Before	2013	Kachemak Bay	Bishop's Beach	Mid	3
Pre_2013_Kachemak Bay_Bishop's Beach_M_3	Cladophora / Chaetomorpha	0	Before	2013	Kachemak Bay	Bishop's Beach	Mid	3
Pre_2013_Kachemak Bay_Bishop's Beach_M_3	Cryptosiphonia	0	Before	2013	Kachemak Bay	Bishop's Beach	Mid	3
Pre_2013_Kachemak Bay_Bishop's Beach_M_3	Devaleraea / Palmaria	0	Before	2013	Kachemak Bay	Bishop's Beach	Mid	3
Pre_2013_Kachemak Bay_Bishop's Beach_M_3	encrusting coralline algae	0	Before	2013	Kachemak Bay	Bishop's Beach	Mid	3
Pre_2013_Kachemak Bay_Bishop's Beach_M_3	Fucus	5	Before	2013	Kachemak Bay	Bishop's Beach	Mid	3
Pre_2013_Kachemak Bay_Bishop's Beach_M_3	Gloiopeltis	0	Before	2013	Kachemak Bay	Bishop's Beach	Mid	3
Pre_2013_Kachemak Bay_Bishop's Beach_M_3	Halosaccion	0	Before	2013	Kachemak Bay	Bishop's Beach	Mid	3
Pre_2013_Kachemak Bay_Bishop's Beach_M_3	Mastocarpus / Mazaella	0	Before	2013	Kachemak Bay	Bishop's Beach	Mid	3
Pre_2013_Kachemak Bay_Bishop's Beach_M_3	Mytilus	0	Before	2013	Kachemak Bay	Bishop's Beach	Mid	3
Pre_2013_Kachemak Bay_Bishop's Beach_M_3	non-coralline algal crust	0	Before	2013	Kachemak Bay	Bishop's Beach	Mid	3
Pre_2013_Kachemak Bay_Bishop's Beach_M_3	Odonthalia / Neorhodomela	0	Before	2013	Kachemak Bay	Bishop's Beach	Mid	3
Pre_2013_Kachemak Bay_Bishop's Beach_M_3	Savoiea / Polysiphonia	0	Before	2013	Kachemak Bay	Bishop's Beach	Mid	3
Pre_2013_Kachemak Bay_Bishop's Beach_M_3	Ulva / Monostroma	0	Before	2013	Kachemak Bay	Bishop's Beach	Mid	3
Pre_2013_Kachemak Bay_Bishop's Beach_M_4	Acrosiphonia	0	Before	2013	Kachemak Bay	Bishop's Beach	Mid	4
Pre_2013_Kachemak Bay_Bishop's Beach_M_4	Alaria	0	Before	2013	Kachemak Bay	Bishop's Beach	Mid	4
Pre_2013_Kachemak Bay_Bishop's Beach_M_4	bare substrate	73	Before	2013	Kachemak Bay	Bishop's Beach	Mid	4
Pre_2013_Kachemak Bay_Bishop's Beach_M_4	barnacles	0	Before	2013	Kachemak Bay	Bishop's Beach	Mid	4
Pre_2013_Kachemak Bay_Bishop's Beach_M_4	Boreophyllum / Pyropia / Wildemania	0	Before	2013	Kachemak Bay	Bishop's Beach	Mid	4
Pre_2013_Kachemak Bay_Bishop's Beach_M_4	Cladophora / Chaetomorpha	0	Before	2013	Kachemak Bay	Bishop's Beach	Mid	4
Pre_2013_Kachemak Bay_Bishop's Beach_M_4	Cryptosiphonia	0	Before	2013	Kachemak Bay	Bishop's Beach	Mid	4
Pre_2013_Kachemak Bay_Bishop's Beach_M_4	Devaleraea / Palmaria	0	Before	2013	Kachemak Bay	Bishop's Beach	Mid	4
Pre_2013_Kachemak Bay_Bishop's Beach_M_4	encrusting coralline algae	0	Before	2013	Kachemak Bay	Bishop's Beach	Mid	4
Pre_2013_Kachemak Bay_Bishop's Beach_M_4	Fucus	20	Before	2013	Kachemak Bay	Bishop's Beach	Mid	4
Pre_2013_Kachemak Bay_Bishop's Beach_M_4	Gloiopeltis	0	Before	2013	Kachemak Bay	Bishop's Beach	Mid	4
Pre_2013_Kachemak Bay_Bishop's Beach_M_4	Halosaccion	0	Before	2013	Kachemak Bay	Bishop's Beach	Mid	4
Pre_2013_Kachemak Bay_Bishop's Beach_M_4	Mastocarpus / Mazaella	0	Before	2013	Kachemak Bay	Bishop's Beach	Mid	4
Pre_2013_Kachemak Bay_Bishop's Beach_M_4	Mytilus	5	Before	2013	Kachemak Bay	Bishop's Beach	Mid	4
Pre_2013_Kachemak Bay_Bishop's Beach_M_4	non-coralline algal crust	0	Before	2013	Kachemak Bay	Bishop's Beach	Mid	4
Pre_2013_Kachemak Bay_Bishop's Beach_M_4	Odonthalia / Neorhodomela	0	Before	2013	Kachemak Bay	Bishop's Beach	Mid	4
Pre_2013_Kachemak Bay_Bishop's Beach_M_4	Savoiea / Polysiphonia	0	Before	2013	Kachemak Bay	Bishop's Beach	Mid	4
Pre_2013_Kachemak Bay_Bishop's Beach_M_4	Ulva / Monostroma	1	Before	2013	Kachemak Bay	Bishop's Beach	Mid	4
Pre_2013_Kachemak Bay_Bishop's Beach_M_5	Acrosiphonia	0	Before	2013	Kachemak Bay	Bishop's Beach	Mid	5
Pre_2013_Kachemak Bay_Bishop's Beach_M_5	Alaria	0	Before	2013	Kachemak Bay	Bishop's Beach	Mid	5
Pre_2013_Kachemak Bay_Bishop's Beach_M_5	bare substrate	100	Before	2013	Kachemak Bay	Bishop's Beach	Mid	5
Pre_2013_Kachemak Bay_Bishop's Beach_M_5	barnacles	0	Before	2013	Kachemak Bay	Bishop's Beach	Mid	5
Pre_2013_Kachemak Bay_Bishop's Beach_M_5	Boreophyllum / Pyropia / Wildemania	0	Before	2013	Kachemak Bay	Bishop's Beach	Mid	5
Pre_2013_Kachemak Bay_Bishop's Beach_M_5	Cladophora / Chaetomorpha	0	Before	2013	Kachemak Bay	Bishop's Beach	Mid	5
Pre_2013_Kachemak Bay_Bishop's Beach_M_5	Cryptosiphonia	0	Before	2013	Kachemak Bay	Bishop's Beach	Mid	5
Pre_2013_Kachemak Bay_Bishop's Beach_M_5	Devaleraea / Palmaria	0	Before	2013	Kachemak Bay	Bishop's Beach	Mid	5
Pre_2013_Kachemak Bay_Bishop's Beach_M_5	encrusting coralline algae	0	Before	2013	Kachemak Bay	Bishop's Beach	Mid	5
Pre_2013_Kachemak Bay_Bishop's Beach_M_5	Fucus	0	Before	2013	Kachemak Bay	Bishop's Beach	Mid	5
Pre_2013_Kachemak Bay_Bishop's Beach_M_5	Gloiopeltis	0	Before	2013	Kachemak Bay	Bishop's Beach	Mid	5
Pre_2013_Kachemak Bay_Bishop's Beach_M_5	Halosaccion	0	Before	2013	Kachemak Bay	Bishop's Beach	Mid	5
Pre_2013_Kachemak Bay_Bishop's Beach_M_5	Mastocarpus / Mazaella	0	Before	2013	Kachemak Bay	Bishop's Beach	Mid	5
Pre_2013_Kachemak Bay_Bishop's Beach_M_5	Mytilus	0	Before	2013	Kachemak Bay	Bishop's Beach	Mid	5
Pre_2013_Kachemak Bay_Bishop's Beach_M_5	non-coralline algal crust	0	Before	2013	Kachemak Bay	Bishop's Beach	Mid	5
Pre_2013_Kachemak Bay_Bishop's Beach_M_5	Odonthalia / Neorhodomela	0	Before	2013	Kachemak Bay	Bishop's Beach	Mid	5
Pre_2013_Kachemak Bay_Bishop's Beach_M_5	Savoiea / Polysiphonia	0	Before	2013	Kachemak Bay	Bishop's Beach	Mid	5
Pre_2013_Kachemak Bay_Bishop's Beach_M_5	Ulva / Monostroma	0	Before	2013	Kachemak Bay	Bishop's Beach	Mid	5
Pre_2013_Kachemak Bay_Bishop's Beach_M_6	Acrosiphonia	0	Before	2013	Kachemak Bay	Bishop's Beach	Mid	6
Pre_2013_Kachemak Bay_Bishop's Beach_M_6	Alaria	0	Before	2013	Kachemak Bay	Bishop's Beach	Mid	6
Pre_2013_Kachemak Bay_Bishop's Beach_M_6	bare substrate	100	Before	2013	Kachemak Bay	Bishop's Beach	Mid	6
Pre_2013_Kachemak Bay_Bishop's Beach_M_6	barnacles	0	Before	2013	Kachemak Bay	Bishop's Beach	Mid	6
Pre_2013_Kachemak Bay_Bishop's Beach_M_6	Boreophyllum / Pyropia / Wildemania	0	Before	2013	Kachemak Bay	Bishop's Beach	Mid	6
Pre_2013_Kachemak Bay_Bishop's Beach_M_6	Cladophora / Chaetomorpha	0	Before	2013	Kachemak Bay	Bishop's Beach	Mid	6
Pre_2013_Kachemak Bay_Bishop's Beach_M_6	Cryptosiphonia	0	Before	2013	Kachemak Bay	Bishop's Beach	Mid	6
Pre_2013_Kachemak Bay_Bishop's Beach_M_6	Devaleraea / Palmaria	0	Before	2013	Kachemak Bay	Bishop's Beach	Mid	6
Pre_2013_Kachemak Bay_Bishop's Beach_M_6	encrusting coralline algae	0	Before	2013	Kachemak Bay	Bishop's Beach	Mid	6
Pre_2013_Kachemak Bay_Bishop's Beach_M_6	Fucus	0	Before	2013	Kachemak Bay	Bishop's Beach	Mid	6
Pre_2013_Kachemak Bay_Bishop's Beach_M_6	Gloiopeltis	0	Before	2013	Kachemak Bay	Bishop's Beach	Mid	6
Pre_2013_Kachemak Bay_Bishop's Beach_M_6	Halosaccion	0	Before	2013	Kachemak Bay	Bishop's Beach	Mid	6
Pre_2013_Kachemak Bay_Bishop's Beach_M_6	Mastocarpus / Mazaella	0	Before	2013	Kachemak Bay	Bishop's Beach	Mid	6
Pre_2013_Kachemak Bay_Bishop's Beach_M_6	Mytilus	0	Before	2013	Kachemak Bay	Bishop's Beach	Mid	6
Pre_2013_Kachemak Bay_Bishop's Beach_M_6	non-coralline algal crust	0	Before	2013	Kachemak Bay	Bishop's Beach	Mid	6
Pre_2013_Kachemak Bay_Bishop's Beach_M_6	Odonthalia / Neorhodomela	0	Before	2013	Kachemak Bay	Bishop's Beach	Mid	6
Pre_2013_Kachemak Bay_Bishop's Beach_M_6	Savoiea / Polysiphonia	0	Before	2013	Kachemak Bay	Bishop's Beach	Mid	6
Pre_2013_Kachemak Bay_Bishop's Beach_M_6	Ulva / Monostroma	0	Before	2013	Kachemak Bay	Bishop's Beach	Mid	6
Pre_2013_Kachemak Bay_Bishop's Beach_M_7	Acrosiphonia	0	Before	2013	Kachemak Bay	Bishop's Beach	Mid	7
Pre_2013_Kachemak Bay_Bishop's Beach_M_7	Alaria	0	Before	2013	Kachemak Bay	Bishop's Beach	Mid	7
Pre_2013_Kachemak Bay_Bishop's Beach_M_7	bare substrate	15	Before	2013	Kachemak Bay	Bishop's Beach	Mid	7
Pre_2013_Kachemak Bay_Bishop's Beach_M_7	barnacles	0	Before	2013	Kachemak Bay	Bishop's Beach	Mid	7
Pre_2013_Kachemak Bay_Bishop's Beach_M_7	Boreophyllum / Pyropia / Wildemania	0	Before	2013	Kachemak Bay	Bishop's Beach	Mid	7
Pre_2013_Kachemak Bay_Bishop's Beach_M_7	Cladophora / Chaetomorpha	0	Before	2013	Kachemak Bay	Bishop's Beach	Mid	7
Pre_2013_Kachemak Bay_Bishop's Beach_M_7	Cryptosiphonia	2	Before	2013	Kachemak Bay	Bishop's Beach	Mid	7
Pre_2013_Kachemak Bay_Bishop's Beach_M_7	Devaleraea / Palmaria	11	Before	2013	Kachemak Bay	Bishop's Beach	Mid	7
Pre_2013_Kachemak Bay_Bishop's Beach_M_7	encrusting coralline algae	0	Before	2013	Kachemak Bay	Bishop's Beach	Mid	7
Pre_2013_Kachemak Bay_Bishop's Beach_M_7	Fucus	20	Before	2013	Kachemak Bay	Bishop's Beach	Mid	7
Pre_2013_Kachemak Bay_Bishop's Beach_M_7	Gloiopeltis	0	Before	2013	Kachemak Bay	Bishop's Beach	Mid	7
Pre_2013_Kachemak Bay_Bishop's Beach_M_7	Halosaccion	0	Before	2013	Kachemak Bay	Bishop's Beach	Mid	7
Pre_2013_Kachemak Bay_Bishop's Beach_M_7	Mastocarpus / Mazaella	2	Before	2013	Kachemak Bay	Bishop's Beach	Mid	7
Pre_2013_Kachemak Bay_Bishop's Beach_M_7	Mytilus	0	Before	2013	Kachemak Bay	Bishop's Beach	Mid	7
Pre_2013_Kachemak Bay_Bishop's Beach_M_7	non-coralline algal crust	0	Before	2013	Kachemak Bay	Bishop's Beach	Mid	7
Pre_2013_Kachemak Bay_Bishop's Beach_M_7	Odonthalia / Neorhodomela	0	Before	2013	Kachemak Bay	Bishop's Beach	Mid	7
Pre_2013_Kachemak Bay_Bishop's Beach_M_7	Savoiea / Polysiphonia	45	Before	2013	Kachemak Bay	Bishop's Beach	Mid	7
Pre_2013_Kachemak Bay_Bishop's Beach_M_7	Ulva / Monostroma	3	Before	2013	Kachemak Bay	Bishop's Beach	Mid	7
Pre_2013_Kachemak Bay_Bishop's Beach_M_8	Acrosiphonia	0	Before	2013	Kachemak Bay	Bishop's Beach	Mid	8
Pre_2013_Kachemak Bay_Bishop's Beach_M_8	Alaria	0	Before	2013	Kachemak Bay	Bishop's Beach	Mid	8
Pre_2013_Kachemak Bay_Bishop's Beach_M_8	bare substrate	95	Before	2013	Kachemak Bay	Bishop's Beach	Mid	8
Pre_2013_Kachemak Bay_Bishop's Beach_M_8	barnacles	5	Before	2013	Kachemak Bay	Bishop's Beach	Mid	8
Pre_2013_Kachemak Bay_Bishop's Beach_M_8	Boreophyllum / Pyropia / Wildemania	0	Before	2013	Kachemak Bay	Bishop's Beach	Mid	8
Pre_2013_Kachemak Bay_Bishop's Beach_M_8	Cladophora / Chaetomorpha	0	Before	2013	Kachemak Bay	Bishop's Beach	Mid	8
Pre_2013_Kachemak Bay_Bishop's Beach_M_8	Cryptosiphonia	0	Before	2013	Kachemak Bay	Bishop's Beach	Mid	8
Pre_2013_Kachemak Bay_Bishop's Beach_M_8	Devaleraea / Palmaria	0	Before	2013	Kachemak Bay	Bishop's Beach	Mid	8
Pre_2013_Kachemak Bay_Bishop's Beach_M_8	encrusting coralline algae	0	Before	2013	Kachemak Bay	Bishop's Beach	Mid	8
Pre_2013_Kachemak Bay_Bishop's Beach_M_8	Fucus	0	Before	2013	Kachemak Bay	Bishop's Beach	Mid	8
Pre_2013_Kachemak Bay_Bishop's Beach_M_8	Gloiopeltis	0	Before	2013	Kachemak Bay	Bishop's Beach	Mid	8
Pre_2013_Kachemak Bay_Bishop's Beach_M_8	Halosaccion	0	Before	2013	Kachemak Bay	Bishop's Beach	Mid	8
Pre_2013_Kachemak Bay_Bishop's Beach_M_8	Mastocarpus / Mazaella	0	Before	2013	Kachemak Bay	Bishop's Beach	Mid	8
Pre_2013_Kachemak Bay_Bishop's Beach_M_8	Mytilus	0	Before	2013	Kachemak Bay	Bishop's Beach	Mid	8
Pre_2013_Kachemak Bay_Bishop's Beach_M_8	non-coralline algal crust	0	Before	2013	Kachemak Bay	Bishop's Beach	Mid	8
Pre_2013_Kachemak Bay_Bishop's Beach_M_8	Odonthalia / Neorhodomela	0	Before	2013	Kachemak Bay	Bishop's Beach	Mid	8
Pre_2013_Kachemak Bay_Bishop's Beach_M_8	Savoiea / Polysiphonia	0	Before	2013	Kachemak Bay	Bishop's Beach	Mid	8
Pre_2013_Kachemak Bay_Bishop's Beach_M_8	Ulva / Monostroma	0	Before	2013	Kachemak Bay	Bishop's Beach	Mid	8
Pre_2013_Kachemak Bay_Bishop's Beach_M_9	Acrosiphonia	0	Before	2013	Kachemak Bay	Bishop's Beach	Mid	9
Pre_2013_Kachemak Bay_Bishop's Beach_M_9	Alaria	0	Before	2013	Kachemak Bay	Bishop's Beach	Mid	9
Pre_2013_Kachemak Bay_Bishop's Beach_M_9	bare substrate	100	Before	2013	Kachemak Bay	Bishop's Beach	Mid	9
Pre_2013_Kachemak Bay_Bishop's Beach_M_9	barnacles	0	Before	2013	Kachemak Bay	Bishop's Beach	Mid	9
Pre_2013_Kachemak Bay_Bishop's Beach_M_9	Boreophyllum / Pyropia / Wildemania	0	Before	2013	Kachemak Bay	Bishop's Beach	Mid	9
Pre_2013_Kachemak Bay_Bishop's Beach_M_9	Cladophora / Chaetomorpha	0	Before	2013	Kachemak Bay	Bishop's Beach	Mid	9
Pre_2013_Kachemak Bay_Bishop's Beach_M_9	Cryptosiphonia	0	Before	2013	Kachemak Bay	Bishop's Beach	Mid	9
Pre_2013_Kachemak Bay_Bishop's Beach_M_9	Devaleraea / Palmaria	0	Before	2013	Kachemak Bay	Bishop's Beach	Mid	9
Pre_2013_Kachemak Bay_Bishop's Beach_M_9	encrusting coralline algae	0	Before	2013	Kachemak Bay	Bishop's Beach	Mid	9
Pre_2013_Kachemak Bay_Bishop's Beach_M_9	Fucus	0	Before	2013	Kachemak Bay	Bishop's Beach	Mid	9
Pre_2013_Kachemak Bay_Bishop's Beach_M_9	Gloiopeltis	0	Before	2013	Kachemak Bay	Bishop's Beach	Mid	9
Pre_2013_Kachemak Bay_Bishop's Beach_M_9	Halosaccion	0	Before	2013	Kachemak Bay	Bishop's Beach	Mid	9
Pre_2013_Kachemak Bay_Bishop's Beach_M_9	Mastocarpus / Mazaella	0	Before	2013	Kachemak Bay	Bishop's Beach	Mid	9
Pre_2013_Kachemak Bay_Bishop's Beach_M_9	Mytilus	0	Before	2013	Kachemak Bay	Bishop's Beach	Mid	9
Pre_2013_Kachemak Bay_Bishop's Beach_M_9	non-coralline algal crust	0	Before	2013	Kachemak Bay	Bishop's Beach	Mid	9
Pre_2013_Kachemak Bay_Bishop's Beach_M_9	Odonthalia / Neorhodomela	0	Before	2013	Kachemak Bay	Bishop's Beach	Mid	9
Pre_2013_Kachemak Bay_Bishop's Beach_M_9	Savoiea / Polysiphonia	0	Before	2013	Kachemak Bay	Bishop's Beach	Mid	9
Pre_2013_Kachemak Bay_Bishop's Beach_M_9	Ulva / Monostroma	0	Before	2013	Kachemak Bay	Bishop's Beach	Mid	9
Pre_2013_Kachemak Bay_Bishop's Beach_M_10	Acrosiphonia	0	Before	2013	Kachemak Bay	Bishop's Beach	Mid	10
Pre_2013_Kachemak Bay_Bishop's Beach_M_10	Alaria	0	Before	2013	Kachemak Bay	Bishop's Beach	Mid	10
Pre_2013_Kachemak Bay_Bishop's Beach_M_10	bare substrate	0	Before	2013	Kachemak Bay	Bishop's Beach	Mid	10
Pre_2013_Kachemak Bay_Bishop's Beach_M_10	barnacles	0	Before	2013	Kachemak Bay	Bishop's Beach	Mid	10
Pre_2013_Kachemak Bay_Bishop's Beach_M_10	Boreophyllum / Pyropia / Wildemania	0	Before	2013	Kachemak Bay	Bishop's Beach	Mid	10
Pre_2013_Kachemak Bay_Bishop's Beach_M_10	Cladophora / Chaetomorpha	0	Before	2013	Kachemak Bay	Bishop's Beach	Mid	10
Pre_2013_Kachemak Bay_Bishop's Beach_M_10	Cryptosiphonia	0	Before	2013	Kachemak Bay	Bishop's Beach	Mid	10
Pre_2013_Kachemak Bay_Bishop's Beach_M_10	Devaleraea / Palmaria	0	Before	2013	Kachemak Bay	Bishop's Beach	Mid	10
Pre_2013_Kachemak Bay_Bishop's Beach_M_10	encrusting coralline algae	0	Before	2013	Kachemak Bay	Bishop's Beach	Mid	10
Pre_2013_Kachemak Bay_Bishop's Beach_M_10	Fucus	0	Before	2013	Kachemak Bay	Bishop's Beach	Mid	10
Pre_2013_Kachemak Bay_Bishop's Beach_M_10	Gloiopeltis	0	Before	2013	Kachemak Bay	Bishop's Beach	Mid	10
Pre_2013_Kachemak Bay_Bishop's Beach_M_10	Halosaccion	0	Before	2013	Kachemak Bay	Bishop's Beach	Mid	10
Pre_2013_Kachemak Bay_Bishop's Beach_M_10	Mastocarpus / Mazaella	0	Before	2013	Kachemak Bay	Bishop's Beach	Mid	10
Pre_2013_Kachemak Bay_Bishop's Beach_M_10	Mytilus	0	Before	2013	Kachemak Bay	Bishop's Beach	Mid	10
Pre_2013_Kachemak Bay_Bishop's Beach_M_10	non-coralline algal crust	0	Before	2013	Kachemak Bay	Bishop's Beach	Mid	10
Pre_2013_Kachemak Bay_Bishop's Beach_M_10	Odonthalia / Neorhodomela	0	Before	2013	Kachemak Bay	Bishop's Beach	Mid	10
Pre_2013_Kachemak Bay_Bishop's Beach_M_10	Savoiea / Polysiphonia	0	Before	2013	Kachemak Bay	Bishop's Beach	Mid	10
Pre_2013_Kachemak Bay_Bishop's Beach_M_10	Ulva / Monostroma	0	Before	2013	Kachemak Bay	Bishop's Beach	Mid	10
Pre_2014_Kachemak Bay_Bishop's Beach_M_1	Acrosiphonia	0	Before	2014	Kachemak Bay	Bishop's Beach	Mid	1
Pre_2014_Kachemak Bay_Bishop's Beach_M_1	Alaria	0	Before	2014	Kachemak Bay	Bishop's Beach	Mid	1
Pre_2014_Kachemak Bay_Bishop's Beach_M_1	bare substrate	75	Before	2014	Kachemak Bay	Bishop's Beach	Mid	1
Pre_2014_Kachemak Bay_Bishop's Beach_M_1	barnacles	1	Before	2014	Kachemak Bay	Bishop's Beach	Mid	1
Pre_2014_Kachemak Bay_Bishop's Beach_M_1	Boreophyllum / Pyropia / Wildemania	0	Before	2014	Kachemak Bay	Bishop's Beach	Mid	1
Pre_2014_Kachemak Bay_Bishop's Beach_M_1	Cladophora / Chaetomorpha	0	Before	2014	Kachemak Bay	Bishop's Beach	Mid	1
Pre_2014_Kachemak Bay_Bishop's Beach_M_1	Cryptosiphonia	0	Before	2014	Kachemak Bay	Bishop's Beach	Mid	1
Pre_2014_Kachemak Bay_Bishop's Beach_M_1	Devaleraea / Palmaria	0	Before	2014	Kachemak Bay	Bishop's Beach	Mid	1
Pre_2014_Kachemak Bay_Bishop's Beach_M_1	encrusting coralline algae	0	Before	2014	Kachemak Bay	Bishop's Beach	Mid	1
Pre_2014_Kachemak Bay_Bishop's Beach_M_1	Fucus	19	Before	2014	Kachemak Bay	Bishop's Beach	Mid	1
Pre_2014_Kachemak Bay_Bishop's Beach_M_1	Gloiopeltis	0	Before	2014	Kachemak Bay	Bishop's Beach	Mid	1
Pre_2014_Kachemak Bay_Bishop's Beach_M_1	Halosaccion	0	Before	2014	Kachemak Bay	Bishop's Beach	Mid	1
Pre_2014_Kachemak Bay_Bishop's Beach_M_1	Mastocarpus / Mazaella	0	Before	2014	Kachemak Bay	Bishop's Beach	Mid	1
Pre_2014_Kachemak Bay_Bishop's Beach_M_1	Mytilus	5	Before	2014	Kachemak Bay	Bishop's Beach	Mid	1
Pre_2014_Kachemak Bay_Bishop's Beach_M_1	non-coralline algal crust	0	Before	2014	Kachemak Bay	Bishop's Beach	Mid	1
Pre_2014_Kachemak Bay_Bishop's Beach_M_1	Odonthalia / Neorhodomela	0	Before	2014	Kachemak Bay	Bishop's Beach	Mid	1
Pre_2014_Kachemak Bay_Bishop's Beach_M_1	Savoiea / Polysiphonia	0	Before	2014	Kachemak Bay	Bishop's Beach	Mid	1
Pre_2014_Kachemak Bay_Bishop's Beach_M_1	Ulva / Monostroma	0	Before	2014	Kachemak Bay	Bishop's Beach	Mid	1
Pre_2014_Kachemak Bay_Bishop's Beach_M_2	Acrosiphonia	1	Before	2014	Kachemak Bay	Bishop's Beach	Mid	2
Pre_2014_Kachemak Bay_Bishop's Beach_M_2	Alaria	0	Before	2014	Kachemak Bay	Bishop's Beach	Mid	2
Pre_2014_Kachemak Bay_Bishop's Beach_M_2	bare substrate	80	Before	2014	Kachemak Bay	Bishop's Beach	Mid	2
Pre_2014_Kachemak Bay_Bishop's Beach_M_2	barnacles	1	Before	2014	Kachemak Bay	Bishop's Beach	Mid	2
Pre_2014_Kachemak Bay_Bishop's Beach_M_2	Boreophyllum / Pyropia / Wildemania	0	Before	2014	Kachemak Bay	Bishop's Beach	Mid	2
Pre_2014_Kachemak Bay_Bishop's Beach_M_2	Cladophora / Chaetomorpha	0	Before	2014	Kachemak Bay	Bishop's Beach	Mid	2
Pre_2014_Kachemak Bay_Bishop's Beach_M_2	Cryptosiphonia	0	Before	2014	Kachemak Bay	Bishop's Beach	Mid	2
Pre_2014_Kachemak Bay_Bishop's Beach_M_2	Devaleraea / Palmaria	0	Before	2014	Kachemak Bay	Bishop's Beach	Mid	2
Pre_2014_Kachemak Bay_Bishop's Beach_M_2	encrusting coralline algae	0	Before	2014	Kachemak Bay	Bishop's Beach	Mid	2
Pre_2014_Kachemak Bay_Bishop's Beach_M_2	Fucus	5	Before	2014	Kachemak Bay	Bishop's Beach	Mid	2
Pre_2014_Kachemak Bay_Bishop's Beach_M_2	Gloiopeltis	0	Before	2014	Kachemak Bay	Bishop's Beach	Mid	2
Pre_2014_Kachemak Bay_Bishop's Beach_M_2	Halosaccion	0	Before	2014	Kachemak Bay	Bishop's Beach	Mid	2
Pre_2014_Kachemak Bay_Bishop's Beach_M_2	Mastocarpus / Mazaella	0	Before	2014	Kachemak Bay	Bishop's Beach	Mid	2
Pre_2014_Kachemak Bay_Bishop's Beach_M_2	Mytilus	10	Before	2014	Kachemak Bay	Bishop's Beach	Mid	2
Pre_2014_Kachemak Bay_Bishop's Beach_M_2	non-coralline algal crust	0	Before	2014	Kachemak Bay	Bishop's Beach	Mid	2
Pre_2014_Kachemak Bay_Bishop's Beach_M_2	Odonthalia / Neorhodomela	0	Before	2014	Kachemak Bay	Bishop's Beach	Mid	2
Pre_2014_Kachemak Bay_Bishop's Beach_M_2	Savoiea / Polysiphonia	0	Before	2014	Kachemak Bay	Bishop's Beach	Mid	2
Pre_2014_Kachemak Bay_Bishop's Beach_M_2	Ulva / Monostroma	1	Before	2014	Kachemak Bay	Bishop's Beach	Mid	2
Pre_2014_Kachemak Bay_Bishop's Beach_M_3	Acrosiphonia	0	Before	2014	Kachemak Bay	Bishop's Beach	Mid	3
Pre_2014_Kachemak Bay_Bishop's Beach_M_3	Alaria	0	Before	2014	Kachemak Bay	Bishop's Beach	Mid	3
Pre_2014_Kachemak Bay_Bishop's Beach_M_3	bare substrate	92	Before	2014	Kachemak Bay	Bishop's Beach	Mid	3
Pre_2014_Kachemak Bay_Bishop's Beach_M_3	barnacles	3	Before	2014	Kachemak Bay	Bishop's Beach	Mid	3
Pre_2014_Kachemak Bay_Bishop's Beach_M_3	Boreophyllum / Pyropia / Wildemania	0	Before	2014	Kachemak Bay	Bishop's Beach	Mid	3
Pre_2014_Kachemak Bay_Bishop's Beach_M_3	Cladophora / Chaetomorpha	0	Before	2014	Kachemak Bay	Bishop's Beach	Mid	3
Pre_2014_Kachemak Bay_Bishop's Beach_M_3	Cryptosiphonia	0	Before	2014	Kachemak Bay	Bishop's Beach	Mid	3
Pre_2014_Kachemak Bay_Bishop's Beach_M_3	Devaleraea / Palmaria	0	Before	2014	Kachemak Bay	Bishop's Beach	Mid	3
Pre_2014_Kachemak Bay_Bishop's Beach_M_3	encrusting coralline algae	0	Before	2014	Kachemak Bay	Bishop's Beach	Mid	3
Pre_2014_Kachemak Bay_Bishop's Beach_M_3	Fucus	2	Before	2014	Kachemak Bay	Bishop's Beach	Mid	3
Pre_2014_Kachemak Bay_Bishop's Beach_M_3	Gloiopeltis	0	Before	2014	Kachemak Bay	Bishop's Beach	Mid	3
Pre_2014_Kachemak Bay_Bishop's Beach_M_3	Halosaccion	0	Before	2014	Kachemak Bay	Bishop's Beach	Mid	3
Pre_2014_Kachemak Bay_Bishop's Beach_M_3	Mastocarpus / Mazaella	0	Before	2014	Kachemak Bay	Bishop's Beach	Mid	3
Pre_2014_Kachemak Bay_Bishop's Beach_M_3	Mytilus	0	Before	2014	Kachemak Bay	Bishop's Beach	Mid	3
Pre_2014_Kachemak Bay_Bishop's Beach_M_3	non-coralline algal crust	0	Before	2014	Kachemak Bay	Bishop's Beach	Mid	3
Pre_2014_Kachemak Bay_Bishop's Beach_M_3	Odonthalia / Neorhodomela	0	Before	2014	Kachemak Bay	Bishop's Beach	Mid	3
Pre_2014_Kachemak Bay_Bishop's Beach_M_3	Savoiea / Polysiphonia	0	Before	2014	Kachemak Bay	Bishop's Beach	Mid	3
Pre_2014_Kachemak Bay_Bishop's Beach_M_3	Ulva / Monostroma	2	Before	2014	Kachemak Bay	Bishop's Beach	Mid	3
Pre_2014_Kachemak Bay_Bishop's Beach_M_4	Acrosiphonia	0	Before	2014	Kachemak Bay	Bishop's Beach	Mid	4
Pre_2014_Kachemak Bay_Bishop's Beach_M_4	Alaria	0	Before	2014	Kachemak Bay	Bishop's Beach	Mid	4
Pre_2014_Kachemak Bay_Bishop's Beach_M_4	bare substrate	99	Before	2014	Kachemak Bay	Bishop's Beach	Mid	4
Pre_2014_Kachemak Bay_Bishop's Beach_M_4	barnacles	0	Before	2014	Kachemak Bay	Bishop's Beach	Mid	4
Pre_2014_Kachemak Bay_Bishop's Beach_M_4	Boreophyllum / Pyropia / Wildemania	0	Before	2014	Kachemak Bay	Bishop's Beach	Mid	4
Pre_2014_Kachemak Bay_Bishop's Beach_M_4	Cladophora / Chaetomorpha	1	Before	2014	Kachemak Bay	Bishop's Beach	Mid	4
Pre_2014_Kachemak Bay_Bishop's Beach_M_4	Cryptosiphonia	0	Before	2014	Kachemak Bay	Bishop's Beach	Mid	4
Pre_2014_Kachemak Bay_Bishop's Beach_M_4	Devaleraea / Palmaria	0	Before	2014	Kachemak Bay	Bishop's Beach	Mid	4
Pre_2014_Kachemak Bay_Bishop's Beach_M_4	encrusting coralline algae	0	Before	2014	Kachemak Bay	Bishop's Beach	Mid	4
Pre_2014_Kachemak Bay_Bishop's Beach_M_4	Fucus	0	Before	2014	Kachemak Bay	Bishop's Beach	Mid	4
Pre_2014_Kachemak Bay_Bishop's Beach_M_4	Gloiopeltis	0	Before	2014	Kachemak Bay	Bishop's Beach	Mid	4
Pre_2014_Kachemak Bay_Bishop's Beach_M_4	Halosaccion	0	Before	2014	Kachemak Bay	Bishop's Beach	Mid	4
Pre_2014_Kachemak Bay_Bishop's Beach_M_4	Mastocarpus / Mazaella	0	Before	2014	Kachemak Bay	Bishop's Beach	Mid	4
Pre_2014_Kachemak Bay_Bishop's Beach_M_4	Mytilus	0	Before	2014	Kachemak Bay	Bishop's Beach	Mid	4
Pre_2014_Kachemak Bay_Bishop's Beach_M_4	non-coralline algal crust	0	Before	2014	Kachemak Bay	Bishop's Beach	Mid	4
Pre_2014_Kachemak Bay_Bishop's Beach_M_4	Odonthalia / Neorhodomela	0	Before	2014	Kachemak Bay	Bishop's Beach	Mid	4
Pre_2014_Kachemak Bay_Bishop's Beach_M_4	Savoiea / Polysiphonia	0	Before	2014	Kachemak Bay	Bishop's Beach	Mid	4
Pre_2014_Kachemak Bay_Bishop's Beach_M_4	Ulva / Monostroma	0	Before	2014	Kachemak Bay	Bishop's Beach	Mid	4
Pre_2014_Kachemak Bay_Bishop's Beach_M_5	Acrosiphonia	0	Before	2014	Kachemak Bay	Bishop's Beach	Mid	5
Pre_2014_Kachemak Bay_Bishop's Beach_M_5	Alaria	0	Before	2014	Kachemak Bay	Bishop's Beach	Mid	5
Pre_2014_Kachemak Bay_Bishop's Beach_M_5	bare substrate	100	Before	2014	Kachemak Bay	Bishop's Beach	Mid	5
Pre_2014_Kachemak Bay_Bishop's Beach_M_5	barnacles	0	Before	2014	Kachemak Bay	Bishop's Beach	Mid	5
Pre_2014_Kachemak Bay_Bishop's Beach_M_5	Boreophyllum / Pyropia / Wildemania	0	Before	2014	Kachemak Bay	Bishop's Beach	Mid	5
Pre_2014_Kachemak Bay_Bishop's Beach_M_5	Cladophora / Chaetomorpha	0	Before	2014	Kachemak Bay	Bishop's Beach	Mid	5
Pre_2014_Kachemak Bay_Bishop's Beach_M_5	Cryptosiphonia	0	Before	2014	Kachemak Bay	Bishop's Beach	Mid	5
Pre_2014_Kachemak Bay_Bishop's Beach_M_5	Devaleraea / Palmaria	0	Before	2014	Kachemak Bay	Bishop's Beach	Mid	5
Pre_2014_Kachemak Bay_Bishop's Beach_M_5	encrusting coralline algae	0	Before	2014	Kachemak Bay	Bishop's Beach	Mid	5
Pre_2014_Kachemak Bay_Bishop's Beach_M_5	Fucus	0	Before	2014	Kachemak Bay	Bishop's Beach	Mid	5
Pre_2014_Kachemak Bay_Bishop's Beach_M_5	Gloiopeltis	0	Before	2014	Kachemak Bay	Bishop's Beach	Mid	5
Pre_2014_Kachemak Bay_Bishop's Beach_M_5	Halosaccion	0	Before	2014	Kachemak Bay	Bishop's Beach	Mid	5
Pre_2014_Kachemak Bay_Bishop's Beach_M_5	Mastocarpus / Mazaella	0	Before	2014	Kachemak Bay	Bishop's Beach	Mid	5
Pre_2014_Kachemak Bay_Bishop's Beach_M_5	Mytilus	0	Before	2014	Kachemak Bay	Bishop's Beach	Mid	5
Pre_2014_Kachemak Bay_Bishop's Beach_M_5	non-coralline algal crust	0	Before	2014	Kachemak Bay	Bishop's Beach	Mid	5
Pre_2014_Kachemak Bay_Bishop's Beach_M_5	Odonthalia / Neorhodomela	0	Before	2014	Kachemak Bay	Bishop's Beach	Mid	5
Pre_2014_Kachemak Bay_Bishop's Beach_M_5	Savoiea / Polysiphonia	0	Before	2014	Kachemak Bay	Bishop's Beach	Mid	5
Pre_2014_Kachemak Bay_Bishop's Beach_M_5	Ulva / Monostroma	0	Before	2014	Kachemak Bay	Bishop's Beach	Mid	5
Pre_2014_Kachemak Bay_Bishop's Beach_M_6	Acrosiphonia	0	Before	2014	Kachemak Bay	Bishop's Beach	Mid	6
Pre_2014_Kachemak Bay_Bishop's Beach_M_6	Alaria	0	Before	2014	Kachemak Bay	Bishop's Beach	Mid	6
Pre_2014_Kachemak Bay_Bishop's Beach_M_6	bare substrate	99	Before	2014	Kachemak Bay	Bishop's Beach	Mid	6
Pre_2014_Kachemak Bay_Bishop's Beach_M_6	barnacles	0	Before	2014	Kachemak Bay	Bishop's Beach	Mid	6
Pre_2014_Kachemak Bay_Bishop's Beach_M_6	Boreophyllum / Pyropia / Wildemania	0	Before	2014	Kachemak Bay	Bishop's Beach	Mid	6
Pre_2014_Kachemak Bay_Bishop's Beach_M_6	Cladophora / Chaetomorpha	0	Before	2014	Kachemak Bay	Bishop's Beach	Mid	6
Pre_2014_Kachemak Bay_Bishop's Beach_M_6	Cryptosiphonia	0	Before	2014	Kachemak Bay	Bishop's Beach	Mid	6
Pre_2014_Kachemak Bay_Bishop's Beach_M_6	Devaleraea / Palmaria	0	Before	2014	Kachemak Bay	Bishop's Beach	Mid	6
Pre_2014_Kachemak Bay_Bishop's Beach_M_6	encrusting coralline algae	0	Before	2014	Kachemak Bay	Bishop's Beach	Mid	6
Pre_2014_Kachemak Bay_Bishop's Beach_M_6	Fucus	1	Before	2014	Kachemak Bay	Bishop's Beach	Mid	6
Pre_2014_Kachemak Bay_Bishop's Beach_M_6	Gloiopeltis	0	Before	2014	Kachemak Bay	Bishop's Beach	Mid	6
Pre_2014_Kachemak Bay_Bishop's Beach_M_6	Halosaccion	0	Before	2014	Kachemak Bay	Bishop's Beach	Mid	6
Pre_2014_Kachemak Bay_Bishop's Beach_M_6	Mastocarpus / Mazaella	0	Before	2014	Kachemak Bay	Bishop's Beach	Mid	6
Pre_2014_Kachemak Bay_Bishop's Beach_M_6	Mytilus	0	Before	2014	Kachemak Bay	Bishop's Beach	Mid	6
Pre_2014_Kachemak Bay_Bishop's Beach_M_6	non-coralline algal crust	0	Before	2014	Kachemak Bay	Bishop's Beach	Mid	6
Pre_2014_Kachemak Bay_Bishop's Beach_M_6	Odonthalia / Neorhodomela	0	Before	2014	Kachemak Bay	Bishop's Beach	Mid	6
Pre_2014_Kachemak Bay_Bishop's Beach_M_6	Savoiea / Polysiphonia	0	Before	2014	Kachemak Bay	Bishop's Beach	Mid	6
Pre_2014_Kachemak Bay_Bishop's Beach_M_6	Ulva / Monostroma	0	Before	2014	Kachemak Bay	Bishop's Beach	Mid	6
Pre_2014_Kachemak Bay_Bishop's Beach_M_7	Acrosiphonia	0	Before	2014	Kachemak Bay	Bishop's Beach	Mid	7
Pre_2014_Kachemak Bay_Bishop's Beach_M_7	Alaria	0	Before	2014	Kachemak Bay	Bishop's Beach	Mid	7
Pre_2014_Kachemak Bay_Bishop's Beach_M_7	bare substrate	100	Before	2014	Kachemak Bay	Bishop's Beach	Mid	7
Pre_2014_Kachemak Bay_Bishop's Beach_M_7	barnacles	0	Before	2014	Kachemak Bay	Bishop's Beach	Mid	7
Pre_2014_Kachemak Bay_Bishop's Beach_M_7	Boreophyllum / Pyropia / Wildemania	0	Before	2014	Kachemak Bay	Bishop's Beach	Mid	7
Pre_2014_Kachemak Bay_Bishop's Beach_M_7	Cladophora / Chaetomorpha	0	Before	2014	Kachemak Bay	Bishop's Beach	Mid	7
Pre_2014_Kachemak Bay_Bishop's Beach_M_7	Cryptosiphonia	0	Before	2014	Kachemak Bay	Bishop's Beach	Mid	7
Pre_2014_Kachemak Bay_Bishop's Beach_M_7	Devaleraea / Palmaria	0	Before	2014	Kachemak Bay	Bishop's Beach	Mid	7
Pre_2014_Kachemak Bay_Bishop's Beach_M_7	encrusting coralline algae	0	Before	2014	Kachemak Bay	Bishop's Beach	Mid	7
Pre_2014_Kachemak Bay_Bishop's Beach_M_7	Fucus	0	Before	2014	Kachemak Bay	Bishop's Beach	Mid	7
Pre_2014_Kachemak Bay_Bishop's Beach_M_7	Gloiopeltis	0	Before	2014	Kachemak Bay	Bishop's Beach	Mid	7
Pre_2014_Kachemak Bay_Bishop's Beach_M_7	Halosaccion	0	Before	2014	Kachemak Bay	Bishop's Beach	Mid	7
Pre_2014_Kachemak Bay_Bishop's Beach_M_7	Mastocarpus / Mazaella	0	Before	2014	Kachemak Bay	Bishop's Beach	Mid	7
Pre_2014_Kachemak Bay_Bishop's Beach_M_7	Mytilus	0	Before	2014	Kachemak Bay	Bishop's Beach	Mid	7
Pre_2014_Kachemak Bay_Bishop's Beach_M_7	non-coralline algal crust	0	Before	2014	Kachemak Bay	Bishop's Beach	Mid	7
Pre_2014_Kachemak Bay_Bishop's Beach_M_7	Odonthalia / Neorhodomela	0	Before	2014	Kachemak Bay	Bishop's Beach	Mid	7
Pre_2014_Kachemak Bay_Bishop's Beach_M_7	Savoiea / Polysiphonia	0	Before	2014	Kachemak Bay	Bishop's Beach	Mid	7
Pre_2014_Kachemak Bay_Bishop's Beach_M_7	Ulva / Monostroma	0	Before	2014	Kachemak Bay	Bishop's Beach	Mid	7
Pre_2014_Kachemak Bay_Bishop's Beach_M_8	Acrosiphonia	0	Before	2014	Kachemak Bay	Bishop's Beach	Mid	8
Pre_2014_Kachemak Bay_Bishop's Beach_M_8	Alaria	0	Before	2014	Kachemak Bay	Bishop's Beach	Mid	8
Pre_2014_Kachemak Bay_Bishop's Beach_M_8	bare substrate	100	Before	2014	Kachemak Bay	Bishop's Beach	Mid	8
Pre_2014_Kachemak Bay_Bishop's Beach_M_8	barnacles	0	Before	2014	Kachemak Bay	Bishop's Beach	Mid	8
Pre_2014_Kachemak Bay_Bishop's Beach_M_8	Boreophyllum / Pyropia / Wildemania	0	Before	2014	Kachemak Bay	Bishop's Beach	Mid	8
Pre_2014_Kachemak Bay_Bishop's Beach_M_8	Cladophora / Chaetomorpha	0	Before	2014	Kachemak Bay	Bishop's Beach	Mid	8
Pre_2014_Kachemak Bay_Bishop's Beach_M_8	Cryptosiphonia	0	Before	2014	Kachemak Bay	Bishop's Beach	Mid	8
Pre_2014_Kachemak Bay_Bishop's Beach_M_8	Devaleraea / Palmaria	0	Before	2014	Kachemak Bay	Bishop's Beach	Mid	8
Pre_2014_Kachemak Bay_Bishop's Beach_M_8	encrusting coralline algae	0	Before	2014	Kachemak Bay	Bishop's Beach	Mid	8
Pre_2014_Kachemak Bay_Bishop's Beach_M_8	Fucus	0	Before	2014	Kachemak Bay	Bishop's Beach	Mid	8
Pre_2014_Kachemak Bay_Bishop's Beach_M_8	Gloiopeltis	0	Before	2014	Kachemak Bay	Bishop's Beach	Mid	8
Pre_2014_Kachemak Bay_Bishop's Beach_M_8	Halosaccion	0	Before	2014	Kachemak Bay	Bishop's Beach	Mid	8
Pre_2014_Kachemak Bay_Bishop's Beach_M_8	Mastocarpus / Mazaella	0	Before	2014	Kachemak Bay	Bishop's Beach	Mid	8
Pre_2014_Kachemak Bay_Bishop's Beach_M_8	Mytilus	0	Before	2014	Kachemak Bay	Bishop's Beach	Mid	8
Pre_2014_Kachemak Bay_Bishop's Beach_M_8	non-coralline algal crust	0	Before	2014	Kachemak Bay	Bishop's Beach	Mid	8
Pre_2014_Kachemak Bay_Bishop's Beach_M_8	Odonthalia / Neorhodomela	0	Before	2014	Kachemak Bay	Bishop's Beach	Mid	8
Pre_2014_Kachemak Bay_Bishop's Beach_M_8	Savoiea / Polysiphonia	0	Before	2014	Kachemak Bay	Bishop's Beach	Mid	8
Pre_2014_Kachemak Bay_Bishop's Beach_M_8	Ulva / Monostroma	0	Before	2014	Kachemak Bay	Bishop's Beach	Mid	8
Pre_2014_Kachemak Bay_Bishop's Beach_M_9	Acrosiphonia	0	Before	2014	Kachemak Bay	Bishop's Beach	Mid	9
Pre_2014_Kachemak Bay_Bishop's Beach_M_9	Alaria	0	Before	2014	Kachemak Bay	Bishop's Beach	Mid	9
Pre_2014_Kachemak Bay_Bishop's Beach_M_9	bare substrate	100	Before	2014	Kachemak Bay	Bishop's Beach	Mid	9
Pre_2014_Kachemak Bay_Bishop's Beach_M_9	barnacles	0	Before	2014	Kachemak Bay	Bishop's Beach	Mid	9
Pre_2014_Kachemak Bay_Bishop's Beach_M_9	Boreophyllum / Pyropia / Wildemania	0	Before	2014	Kachemak Bay	Bishop's Beach	Mid	9
Pre_2014_Kachemak Bay_Bishop's Beach_M_9	Cladophora / Chaetomorpha	0	Before	2014	Kachemak Bay	Bishop's Beach	Mid	9
Pre_2014_Kachemak Bay_Bishop's Beach_M_9	Cryptosiphonia	0	Before	2014	Kachemak Bay	Bishop's Beach	Mid	9
Pre_2014_Kachemak Bay_Bishop's Beach_M_9	Devaleraea / Palmaria	0	Before	2014	Kachemak Bay	Bishop's Beach	Mid	9
Pre_2014_Kachemak Bay_Bishop's Beach_M_9	encrusting coralline algae	0	Before	2014	Kachemak Bay	Bishop's Beach	Mid	9
Pre_2014_Kachemak Bay_Bishop's Beach_M_9	Fucus	0	Before	2014	Kachemak Bay	Bishop's Beach	Mid	9
Pre_2014_Kachemak Bay_Bishop's Beach_M_9	Gloiopeltis	0	Before	2014	Kachemak Bay	Bishop's Beach	Mid	9
Pre_2014_Kachemak Bay_Bishop's Beach_M_9	Halosaccion	0	Before	2014	Kachemak Bay	Bishop's Beach	Mid	9
Pre_2014_Kachemak Bay_Bishop's Beach_M_9	Mastocarpus / Mazaella	0	Before	2014	Kachemak Bay	Bishop's Beach	Mid	9
Pre_2014_Kachemak Bay_Bishop's Beach_M_9	Mytilus	0	Before	2014	Kachemak Bay	Bishop's Beach	Mid	9
Pre_2014_Kachemak Bay_Bishop's Beach_M_9	non-coralline algal crust	0	Before	2014	Kachemak Bay	Bishop's Beach	Mid	9
Pre_2014_Kachemak Bay_Bishop's Beach_M_9	Odonthalia / Neorhodomela	0	Before	2014	Kachemak Bay	Bishop's Beach	Mid	9
Pre_2014_Kachemak Bay_Bishop's Beach_M_9	Savoiea / Polysiphonia	0	Before	2014	Kachemak Bay	Bishop's Beach	Mid	9
Pre_2014_Kachemak Bay_Bishop's Beach_M_9	Ulva / Monostroma	0	Before	2014	Kachemak Bay	Bishop's Beach	Mid	9
Pre_2014_Kachemak Bay_Bishop's Beach_M_10	Acrosiphonia	0	Before	2014	Kachemak Bay	Bishop's Beach	Mid	10
Pre_2014_Kachemak Bay_Bishop's Beach_M_10	Alaria	0	Before	2014	Kachemak Bay	Bishop's Beach	Mid	10
Pre_2014_Kachemak Bay_Bishop's Beach_M_10	bare substrate	99	Before	2014	Kachemak Bay	Bishop's Beach	Mid	10
Pre_2014_Kachemak Bay_Bishop's Beach_M_10	barnacles	1	Before	2014	Kachemak Bay	Bishop's Beach	Mid	10
Pre_2014_Kachemak Bay_Bishop's Beach_M_10	Boreophyllum / Pyropia / Wildemania	0	Before	2014	Kachemak Bay	Bishop's Beach	Mid	10
Pre_2014_Kachemak Bay_Bishop's Beach_M_10	Cladophora / Chaetomorpha	0	Before	2014	Kachemak Bay	Bishop's Beach	Mid	10
Pre_2014_Kachemak Bay_Bishop's Beach_M_10	Cryptosiphonia	0	Before	2014	Kachemak Bay	Bishop's Beach	Mid	10
Pre_2014_Kachemak Bay_Bishop's Beach_M_10	Devaleraea / Palmaria	0	Before	2014	Kachemak Bay	Bishop's Beach	Mid	10
Pre_2014_Kachemak Bay_Bishop's Beach_M_10	encrusting coralline algae	0	Before	2014	Kachemak Bay	Bishop's Beach	Mid	10
Pre_2014_Kachemak Bay_Bishop's Beach_M_10	Fucus	0	Before	2014	Kachemak Bay	Bishop's Beach	Mid	10
Pre_2014_Kachemak Bay_Bishop's Beach_M_10	Gloiopeltis	0	Before	2014	Kachemak Bay	Bishop's Beach	Mid	10
Pre_2014_Kachemak Bay_Bishop's Beach_M_10	Halosaccion	0	Before	2014	Kachemak Bay	Bishop's Beach	Mid	10
Pre_2014_Kachemak Bay_Bishop's Beach_M_10	Mastocarpus / Mazaella	0	Before	2014	Kachemak Bay	Bishop's Beach	Mid	10
Pre_2014_Kachemak Bay_Bishop's Beach_M_10	Mytilus	0	Before	2014	Kachemak Bay	Bishop's Beach	Mid	10
Pre_2014_Kachemak Bay_Bishop's Beach_M_10	non-coralline algal crust	0	Before	2014	Kachemak Bay	Bishop's Beach	Mid	10
Pre_2014_Kachemak Bay_Bishop's Beach_M_10	Odonthalia / Neorhodomela	0	Before	2014	Kachemak Bay	Bishop's Beach	Mid	10
Pre_2014_Kachemak Bay_Bishop's Beach_M_10	Savoiea / Polysiphonia	0	Before	2014	Kachemak Bay	Bishop's Beach	Mid	10
Pre_2014_Kachemak Bay_Bishop's Beach_M_10	Ulva / Monostroma	0	Before	2014	Kachemak Bay	Bishop's Beach	Mid	10
Post_2015_Kachemak Bay_Bishop's Beach_M_1	Acrosiphonia	0	During	2015	Kachemak Bay	Bishop's Beach	Mid	1
Post_2015_Kachemak Bay_Bishop's Beach_M_1	Alaria	0	During	2015	Kachemak Bay	Bishop's Beach	Mid	1
Post_2015_Kachemak Bay_Bishop's Beach_M_1	bare substrate	100	During	2015	Kachemak Bay	Bishop's Beach	Mid	1
Post_2015_Kachemak Bay_Bishop's Beach_M_1	barnacles	0	During	2015	Kachemak Bay	Bishop's Beach	Mid	1
Post_2015_Kachemak Bay_Bishop's Beach_M_1	Boreophyllum / Pyropia / Wildemania	0	During	2015	Kachemak Bay	Bishop's Beach	Mid	1
Post_2015_Kachemak Bay_Bishop's Beach_M_1	Cladophora / Chaetomorpha	0	During	2015	Kachemak Bay	Bishop's Beach	Mid	1
Post_2015_Kachemak Bay_Bishop's Beach_M_1	Cryptosiphonia	0	During	2015	Kachemak Bay	Bishop's Beach	Mid	1
Post_2015_Kachemak Bay_Bishop's Beach_M_1	Devaleraea / Palmaria	0	During	2015	Kachemak Bay	Bishop's Beach	Mid	1
Post_2015_Kachemak Bay_Bishop's Beach_M_1	encrusting coralline algae	0	During	2015	Kachemak Bay	Bishop's Beach	Mid	1
Post_2015_Kachemak Bay_Bishop's Beach_M_1	Fucus	0	During	2015	Kachemak Bay	Bishop's Beach	Mid	1
Post_2015_Kachemak Bay_Bishop's Beach_M_1	Gloiopeltis	0	During	2015	Kachemak Bay	Bishop's Beach	Mid	1
Post_2015_Kachemak Bay_Bishop's Beach_M_1	Halosaccion	0	During	2015	Kachemak Bay	Bishop's Beach	Mid	1
Post_2015_Kachemak Bay_Bishop's Beach_M_1	Mastocarpus / Mazaella	0	During	2015	Kachemak Bay	Bishop's Beach	Mid	1
Post_2015_Kachemak Bay_Bishop's Beach_M_1	Mytilus	0	During	2015	Kachemak Bay	Bishop's Beach	Mid	1
Post_2015_Kachemak Bay_Bishop's Beach_M_1	non-coralline algal crust	0	During	2015	Kachemak Bay	Bishop's Beach	Mid	1
Post_2015_Kachemak Bay_Bishop's Beach_M_1	Odonthalia / Neorhodomela	0	During	2015	Kachemak Bay	Bishop's Beach	Mid	1
Post_2015_Kachemak Bay_Bishop's Beach_M_1	Savoiea / Polysiphonia	0	During	2015	Kachemak Bay	Bishop's Beach	Mid	1
Post_2015_Kachemak Bay_Bishop's Beach_M_1	Ulva / Monostroma	0	During	2015	Kachemak Bay	Bishop's Beach	Mid	1
Post_2015_Kachemak Bay_Bishop's Beach_M_2	Acrosiphonia	0	During	2015	Kachemak Bay	Bishop's Beach	Mid	2
Post_2015_Kachemak Bay_Bishop's Beach_M_2	Alaria	0	During	2015	Kachemak Bay	Bishop's Beach	Mid	2
Post_2015_Kachemak Bay_Bishop's Beach_M_2	bare substrate	98	During	2015	Kachemak Bay	Bishop's Beach	Mid	2
Post_2015_Kachemak Bay_Bishop's Beach_M_2	barnacles	1	During	2015	Kachemak Bay	Bishop's Beach	Mid	2
Post_2015_Kachemak Bay_Bishop's Beach_M_2	Boreophyllum / Pyropia / Wildemania	0	During	2015	Kachemak Bay	Bishop's Beach	Mid	2
Post_2015_Kachemak Bay_Bishop's Beach_M_2	Cladophora / Chaetomorpha	0	During	2015	Kachemak Bay	Bishop's Beach	Mid	2
Post_2015_Kachemak Bay_Bishop's Beach_M_2	Cryptosiphonia	0	During	2015	Kachemak Bay	Bishop's Beach	Mid	2
Post_2015_Kachemak Bay_Bishop's Beach_M_2	Devaleraea / Palmaria	0	During	2015	Kachemak Bay	Bishop's Beach	Mid	2
Post_2015_Kachemak Bay_Bishop's Beach_M_2	encrusting coralline algae	0	During	2015	Kachemak Bay	Bishop's Beach	Mid	2
Post_2015_Kachemak Bay_Bishop's Beach_M_2	Fucus	0	During	2015	Kachemak Bay	Bishop's Beach	Mid	2
Post_2015_Kachemak Bay_Bishop's Beach_M_2	Gloiopeltis	0	During	2015	Kachemak Bay	Bishop's Beach	Mid	2
Post_2015_Kachemak Bay_Bishop's Beach_M_2	Halosaccion	0	During	2015	Kachemak Bay	Bishop's Beach	Mid	2
Post_2015_Kachemak Bay_Bishop's Beach_M_2	Mastocarpus / Mazaella	0	During	2015	Kachemak Bay	Bishop's Beach	Mid	2
Post_2015_Kachemak Bay_Bishop's Beach_M_2	Mytilus	0	During	2015	Kachemak Bay	Bishop's Beach	Mid	2
Post_2015_Kachemak Bay_Bishop's Beach_M_2	non-coralline algal crust	1	During	2015	Kachemak Bay	Bishop's Beach	Mid	2
Post_2015_Kachemak Bay_Bishop's Beach_M_2	Odonthalia / Neorhodomela	0	During	2015	Kachemak Bay	Bishop's Beach	Mid	2
Post_2015_Kachemak Bay_Bishop's Beach_M_2	Savoiea / Polysiphonia	0	During	2015	Kachemak Bay	Bishop's Beach	Mid	2
Post_2015_Kachemak Bay_Bishop's Beach_M_2	Ulva / Monostroma	0	During	2015	Kachemak Bay	Bishop's Beach	Mid	2
Post_2015_Kachemak Bay_Bishop's Beach_M_3	Acrosiphonia	0	During	2015	Kachemak Bay	Bishop's Beach	Mid	3
Post_2015_Kachemak Bay_Bishop's Beach_M_3	Alaria	0	During	2015	Kachemak Bay	Bishop's Beach	Mid	3
Post_2015_Kachemak Bay_Bishop's Beach_M_3	bare substrate	100	During	2015	Kachemak Bay	Bishop's Beach	Mid	3
Post_2015_Kachemak Bay_Bishop's Beach_M_3	barnacles	0	During	2015	Kachemak Bay	Bishop's Beach	Mid	3
Post_2015_Kachemak Bay_Bishop's Beach_M_3	Boreophyllum / Pyropia / Wildemania	0	During	2015	Kachemak Bay	Bishop's Beach	Mid	3
Post_2015_Kachemak Bay_Bishop's Beach_M_3	Cladophora / Chaetomorpha	0	During	2015	Kachemak Bay	Bishop's Beach	Mid	3
Post_2015_Kachemak Bay_Bishop's Beach_M_3	Cryptosiphonia	0	During	2015	Kachemak Bay	Bishop's Beach	Mid	3
Post_2015_Kachemak Bay_Bishop's Beach_M_3	Devaleraea / Palmaria	0	During	2015	Kachemak Bay	Bishop's Beach	Mid	3
Post_2015_Kachemak Bay_Bishop's Beach_M_3	encrusting coralline algae	0	During	2015	Kachemak Bay	Bishop's Beach	Mid	3
Post_2015_Kachemak Bay_Bishop's Beach_M_3	Fucus	0	During	2015	Kachemak Bay	Bishop's Beach	Mid	3
Post_2015_Kachemak Bay_Bishop's Beach_M_3	Gloiopeltis	0	During	2015	Kachemak Bay	Bishop's Beach	Mid	3
Post_2015_Kachemak Bay_Bishop's Beach_M_3	Halosaccion	0	During	2015	Kachemak Bay	Bishop's Beach	Mid	3
Post_2015_Kachemak Bay_Bishop's Beach_M_3	Mastocarpus / Mazaella	0	During	2015	Kachemak Bay	Bishop's Beach	Mid	3
Post_2015_Kachemak Bay_Bishop's Beach_M_3	Mytilus	0	During	2015	Kachemak Bay	Bishop's Beach	Mid	3
Post_2015_Kachemak Bay_Bishop's Beach_M_3	non-coralline algal crust	0	During	2015	Kachemak Bay	Bishop's Beach	Mid	3
Post_2015_Kachemak Bay_Bishop's Beach_M_3	Odonthalia / Neorhodomela	0	During	2015	Kachemak Bay	Bishop's Beach	Mid	3
Post_2015_Kachemak Bay_Bishop's Beach_M_3	Savoiea / Polysiphonia	0	During	2015	Kachemak Bay	Bishop's Beach	Mid	3
Post_2015_Kachemak Bay_Bishop's Beach_M_3	Ulva / Monostroma	0	During	2015	Kachemak Bay	Bishop's Beach	Mid	3
Post_2015_Kachemak Bay_Bishop's Beach_M_4	Acrosiphonia	0	During	2015	Kachemak Bay	Bishop's Beach	Mid	4
Post_2015_Kachemak Bay_Bishop's Beach_M_4	Alaria	0	During	2015	Kachemak Bay	Bishop's Beach	Mid	4
Post_2015_Kachemak Bay_Bishop's Beach_M_4	bare substrate	99	During	2015	Kachemak Bay	Bishop's Beach	Mid	4
Post_2015_Kachemak Bay_Bishop's Beach_M_4	barnacles	1	During	2015	Kachemak Bay	Bishop's Beach	Mid	4
Post_2015_Kachemak Bay_Bishop's Beach_M_4	Boreophyllum / Pyropia / Wildemania	0	During	2015	Kachemak Bay	Bishop's Beach	Mid	4
Post_2015_Kachemak Bay_Bishop's Beach_M_4	Cladophora / Chaetomorpha	0	During	2015	Kachemak Bay	Bishop's Beach	Mid	4
Post_2015_Kachemak Bay_Bishop's Beach_M_4	Cryptosiphonia	0	During	2015	Kachemak Bay	Bishop's Beach	Mid	4
Post_2015_Kachemak Bay_Bishop's Beach_M_4	Devaleraea / Palmaria	0	During	2015	Kachemak Bay	Bishop's Beach	Mid	4
Post_2015_Kachemak Bay_Bishop's Beach_M_4	encrusting coralline algae	0	During	2015	Kachemak Bay	Bishop's Beach	Mid	4
Post_2015_Kachemak Bay_Bishop's Beach_M_4	Fucus	0	During	2015	Kachemak Bay	Bishop's Beach	Mid	4
Post_2015_Kachemak Bay_Bishop's Beach_M_4	Gloiopeltis	0	During	2015	Kachemak Bay	Bishop's Beach	Mid	4
Post_2015_Kachemak Bay_Bishop's Beach_M_4	Halosaccion	0	During	2015	Kachemak Bay	Bishop's Beach	Mid	4
Post_2015_Kachemak Bay_Bishop's Beach_M_4	Mastocarpus / Mazaella	0	During	2015	Kachemak Bay	Bishop's Beach	Mid	4
Post_2015_Kachemak Bay_Bishop's Beach_M_4	Mytilus	0	During	2015	Kachemak Bay	Bishop's Beach	Mid	4
Post_2015_Kachemak Bay_Bishop's Beach_M_4	non-coralline algal crust	0	During	2015	Kachemak Bay	Bishop's Beach	Mid	4
Post_2015_Kachemak Bay_Bishop's Beach_M_4	Odonthalia / Neorhodomela	0	During	2015	Kachemak Bay	Bishop's Beach	Mid	4
Post_2015_Kachemak Bay_Bishop's Beach_M_4	Savoiea / Polysiphonia	0	During	2015	Kachemak Bay	Bishop's Beach	Mid	4
Post_2015_Kachemak Bay_Bishop's Beach_M_4	Ulva / Monostroma	0	During	2015	Kachemak Bay	Bishop's Beach	Mid	4
Post_2015_Kachemak Bay_Bishop's Beach_M_5	Acrosiphonia	0	During	2015	Kachemak Bay	Bishop's Beach	Mid	5
Post_2015_Kachemak Bay_Bishop's Beach_M_5	Alaria	0	During	2015	Kachemak Bay	Bishop's Beach	Mid	5
Post_2015_Kachemak Bay_Bishop's Beach_M_5	bare substrate	87	During	2015	Kachemak Bay	Bishop's Beach	Mid	5
Post_2015_Kachemak Bay_Bishop's Beach_M_5	barnacles	1	During	2015	Kachemak Bay	Bishop's Beach	Mid	5
Post_2015_Kachemak Bay_Bishop's Beach_M_5	Boreophyllum / Pyropia / Wildemania	0	During	2015	Kachemak Bay	Bishop's Beach	Mid	5
Post_2015_Kachemak Bay_Bishop's Beach_M_5	Cladophora / Chaetomorpha	0	During	2015	Kachemak Bay	Bishop's Beach	Mid	5
Post_2015_Kachemak Bay_Bishop's Beach_M_5	Cryptosiphonia	0	During	2015	Kachemak Bay	Bishop's Beach	Mid	5
Post_2015_Kachemak Bay_Bishop's Beach_M_5	Devaleraea / Palmaria	1	During	2015	Kachemak Bay	Bishop's Beach	Mid	5
Post_2015_Kachemak Bay_Bishop's Beach_M_5	encrusting coralline algae	0	During	2015	Kachemak Bay	Bishop's Beach	Mid	5
Post_2015_Kachemak Bay_Bishop's Beach_M_5	Fucus	2	During	2015	Kachemak Bay	Bishop's Beach	Mid	5
Post_2015_Kachemak Bay_Bishop's Beach_M_5	Gloiopeltis	0	During	2015	Kachemak Bay	Bishop's Beach	Mid	5
Post_2015_Kachemak Bay_Bishop's Beach_M_5	Halosaccion	0	During	2015	Kachemak Bay	Bishop's Beach	Mid	5
Post_2015_Kachemak Bay_Bishop's Beach_M_5	Mastocarpus / Mazaella	0	During	2015	Kachemak Bay	Bishop's Beach	Mid	5
Post_2015_Kachemak Bay_Bishop's Beach_M_5	Mytilus	3	During	2015	Kachemak Bay	Bishop's Beach	Mid	5
Post_2015_Kachemak Bay_Bishop's Beach_M_5	non-coralline algal crust	0	During	2015	Kachemak Bay	Bishop's Beach	Mid	5
Post_2015_Kachemak Bay_Bishop's Beach_M_5	Odonthalia / Neorhodomela	0	During	2015	Kachemak Bay	Bishop's Beach	Mid	5
Post_2015_Kachemak Bay_Bishop's Beach_M_5	Savoiea / Polysiphonia	0	During	2015	Kachemak Bay	Bishop's Beach	Mid	5
Post_2015_Kachemak Bay_Bishop's Beach_M_5	Ulva / Monostroma	3	During	2015	Kachemak Bay	Bishop's Beach	Mid	5
Post_2015_Kachemak Bay_Bishop's Beach_M_6	Acrosiphonia	0	During	2015	Kachemak Bay	Bishop's Beach	Mid	6
Post_2015_Kachemak Bay_Bishop's Beach_M_6	Alaria	0	During	2015	Kachemak Bay	Bishop's Beach	Mid	6
Post_2015_Kachemak Bay_Bishop's Beach_M_6	bare substrate	86	During	2015	Kachemak Bay	Bishop's Beach	Mid	6
Post_2015_Kachemak Bay_Bishop's Beach_M_6	barnacles	3	During	2015	Kachemak Bay	Bishop's Beach	Mid	6
Post_2015_Kachemak Bay_Bishop's Beach_M_6	Boreophyllum / Pyropia / Wildemania	0	During	2015	Kachemak Bay	Bishop's Beach	Mid	6
Post_2015_Kachemak Bay_Bishop's Beach_M_6	Cladophora / Chaetomorpha	0	During	2015	Kachemak Bay	Bishop's Beach	Mid	6
Post_2015_Kachemak Bay_Bishop's Beach_M_6	Cryptosiphonia	0	During	2015	Kachemak Bay	Bishop's Beach	Mid	6
Post_2015_Kachemak Bay_Bishop's Beach_M_6	Devaleraea / Palmaria	0	During	2015	Kachemak Bay	Bishop's Beach	Mid	6
Post_2015_Kachemak Bay_Bishop's Beach_M_6	encrusting coralline algae	0	During	2015	Kachemak Bay	Bishop's Beach	Mid	6
Post_2015_Kachemak Bay_Bishop's Beach_M_6	Fucus	5	During	2015	Kachemak Bay	Bishop's Beach	Mid	6
Post_2015_Kachemak Bay_Bishop's Beach_M_6	Gloiopeltis	0	During	2015	Kachemak Bay	Bishop's Beach	Mid	6
Post_2015_Kachemak Bay_Bishop's Beach_M_6	Halosaccion	0	During	2015	Kachemak Bay	Bishop's Beach	Mid	6
Post_2015_Kachemak Bay_Bishop's Beach_M_6	Mastocarpus / Mazaella	0	During	2015	Kachemak Bay	Bishop's Beach	Mid	6
Post_2015_Kachemak Bay_Bishop's Beach_M_6	Mytilus	1	During	2015	Kachemak Bay	Bishop's Beach	Mid	6
Post_2015_Kachemak Bay_Bishop's Beach_M_6	non-coralline algal crust	2	During	2015	Kachemak Bay	Bishop's Beach	Mid	6
Post_2015_Kachemak Bay_Bishop's Beach_M_6	Odonthalia / Neorhodomela	0	During	2015	Kachemak Bay	Bishop's Beach	Mid	6
Post_2015_Kachemak Bay_Bishop's Beach_M_6	Savoiea / Polysiphonia	0	During	2015	Kachemak Bay	Bishop's Beach	Mid	6
Post_2015_Kachemak Bay_Bishop's Beach_M_6	Ulva / Monostroma	3	During	2015	Kachemak Bay	Bishop's Beach	Mid	6
Post_2015_Kachemak Bay_Bishop's Beach_M_7	Acrosiphonia	0	During	2015	Kachemak Bay	Bishop's Beach	Mid	7
Post_2015_Kachemak Bay_Bishop's Beach_M_7	Alaria	0	During	2015	Kachemak Bay	Bishop's Beach	Mid	7
Post_2015_Kachemak Bay_Bishop's Beach_M_7	bare substrate	97.0297	During	2015	Kachemak Bay	Bishop's Beach	Mid	7
Post_2015_Kachemak Bay_Bishop's Beach_M_7	barnacles	0	During	2015	Kachemak Bay	Bishop's Beach	Mid	7
Post_2015_Kachemak Bay_Bishop's Beach_M_7	Boreophyllum / Pyropia / Wildemania	0	During	2015	Kachemak Bay	Bishop's Beach	Mid	7
Post_2015_Kachemak Bay_Bishop's Beach_M_7	Cladophora / Chaetomorpha	0	During	2015	Kachemak Bay	Bishop's Beach	Mid	7
Post_2015_Kachemak Bay_Bishop's Beach_M_7	Cryptosiphonia	0	During	2015	Kachemak Bay	Bishop's Beach	Mid	7
Post_2015_Kachemak Bay_Bishop's Beach_M_7	Devaleraea / Palmaria	0	During	2015	Kachemak Bay	Bishop's Beach	Mid	7
Post_2015_Kachemak Bay_Bishop's Beach_M_7	encrusting coralline algae	0	During	2015	Kachemak Bay	Bishop's Beach	Mid	7
Post_2015_Kachemak Bay_Bishop's Beach_M_7	Fucus	0.990099	During	2015	Kachemak Bay	Bishop's Beach	Mid	7
Post_2015_Kachemak Bay_Bishop's Beach_M_7	Gloiopeltis	0	During	2015	Kachemak Bay	Bishop's Beach	Mid	7
Post_2015_Kachemak Bay_Bishop's Beach_M_7	Halosaccion	0	During	2015	Kachemak Bay	Bishop's Beach	Mid	7
Post_2015_Kachemak Bay_Bishop's Beach_M_7	Mastocarpus / Mazaella	0	During	2015	Kachemak Bay	Bishop's Beach	Mid	7
Post_2015_Kachemak Bay_Bishop's Beach_M_7	Mytilus	0	During	2015	Kachemak Bay	Bishop's Beach	Mid	7
Post_2015_Kachemak Bay_Bishop's Beach_M_7	non-coralline algal crust	1.9802	During	2015	Kachemak Bay	Bishop's Beach	Mid	7
Post_2015_Kachemak Bay_Bishop's Beach_M_7	Odonthalia / Neorhodomela	0	During	2015	Kachemak Bay	Bishop's Beach	Mid	7
Post_2015_Kachemak Bay_Bishop's Beach_M_7	Savoiea / Polysiphonia	0	During	2015	Kachemak Bay	Bishop's Beach	Mid	7
Post_2015_Kachemak Bay_Bishop's Beach_M_7	Ulva / Monostroma	0	During	2015	Kachemak Bay	Bishop's Beach	Mid	7
Post_2015_Kachemak Bay_Bishop's Beach_M_8	Acrosiphonia	0	During	2015	Kachemak Bay	Bishop's Beach	Mid	8
Post_2015_Kachemak Bay_Bishop's Beach_M_8	Alaria	0	During	2015	Kachemak Bay	Bishop's Beach	Mid	8
Post_2015_Kachemak Bay_Bishop's Beach_M_8	bare substrate	100	During	2015	Kachemak Bay	Bishop's Beach	Mid	8
Post_2015_Kachemak Bay_Bishop's Beach_M_8	barnacles	0	During	2015	Kachemak Bay	Bishop's Beach	Mid	8
Post_2015_Kachemak Bay_Bishop's Beach_M_8	Boreophyllum / Pyropia / Wildemania	0	During	2015	Kachemak Bay	Bishop's Beach	Mid	8
Post_2015_Kachemak Bay_Bishop's Beach_M_8	Cladophora / Chaetomorpha	0	During	2015	Kachemak Bay	Bishop's Beach	Mid	8
Post_2015_Kachemak Bay_Bishop's Beach_M_8	Cryptosiphonia	0	During	2015	Kachemak Bay	Bishop's Beach	Mid	8
Post_2015_Kachemak Bay_Bishop's Beach_M_8	Devaleraea / Palmaria	0	During	2015	Kachemak Bay	Bishop's Beach	Mid	8
Post_2015_Kachemak Bay_Bishop's Beach_M_8	encrusting coralline algae	0	During	2015	Kachemak Bay	Bishop's Beach	Mid	8
Post_2015_Kachemak Bay_Bishop's Beach_M_8	Fucus	0	During	2015	Kachemak Bay	Bishop's Beach	Mid	8
Post_2015_Kachemak Bay_Bishop's Beach_M_8	Gloiopeltis	0	During	2015	Kachemak Bay	Bishop's Beach	Mid	8
Post_2015_Kachemak Bay_Bishop's Beach_M_8	Halosaccion	0	During	2015	Kachemak Bay	Bishop's Beach	Mid	8
Post_2015_Kachemak Bay_Bishop's Beach_M_8	Mastocarpus / Mazaella	0	During	2015	Kachemak Bay	Bishop's Beach	Mid	8
Post_2015_Kachemak Bay_Bishop's Beach_M_8	Mytilus	0	During	2015	Kachemak Bay	Bishop's Beach	Mid	8
Post_2015_Kachemak Bay_Bishop's Beach_M_8	non-coralline algal crust	0	During	2015	Kachemak Bay	Bishop's Beach	Mid	8
Post_2015_Kachemak Bay_Bishop's Beach_M_8	Odonthalia / Neorhodomela	0	During	2015	Kachemak Bay	Bishop's Beach	Mid	8
Post_2015_Kachemak Bay_Bishop's Beach_M_8	Savoiea / Polysiphonia	0	During	2015	Kachemak Bay	Bishop's Beach	Mid	8
Post_2015_Kachemak Bay_Bishop's Beach_M_8	Ulva / Monostroma	0	During	2015	Kachemak Bay	Bishop's Beach	Mid	8
Post_2015_Kachemak Bay_Bishop's Beach_M_9	Acrosiphonia	0	During	2015	Kachemak Bay	Bishop's Beach	Mid	9
Post_2015_Kachemak Bay_Bishop's Beach_M_9	Alaria	0	During	2015	Kachemak Bay	Bishop's Beach	Mid	9
Post_2015_Kachemak Bay_Bishop's Beach_M_9	bare substrate	100	During	2015	Kachemak Bay	Bishop's Beach	Mid	9
Post_2015_Kachemak Bay_Bishop's Beach_M_9	barnacles	0	During	2015	Kachemak Bay	Bishop's Beach	Mid	9
Post_2015_Kachemak Bay_Bishop's Beach_M_9	Boreophyllum / Pyropia / Wildemania	0	During	2015	Kachemak Bay	Bishop's Beach	Mid	9
Post_2015_Kachemak Bay_Bishop's Beach_M_9	Cladophora / Chaetomorpha	0	During	2015	Kachemak Bay	Bishop's Beach	Mid	9
Post_2015_Kachemak Bay_Bishop's Beach_M_9	Cryptosiphonia	0	During	2015	Kachemak Bay	Bishop's Beach	Mid	9
Post_2015_Kachemak Bay_Bishop's Beach_M_9	Devaleraea / Palmaria	0	During	2015	Kachemak Bay	Bishop's Beach	Mid	9
Post_2015_Kachemak Bay_Bishop's Beach_M_9	encrusting coralline algae	0	During	2015	Kachemak Bay	Bishop's Beach	Mid	9
Post_2015_Kachemak Bay_Bishop's Beach_M_9	Fucus	0	During	2015	Kachemak Bay	Bishop's Beach	Mid	9
Post_2015_Kachemak Bay_Bishop's Beach_M_9	Gloiopeltis	0	During	2015	Kachemak Bay	Bishop's Beach	Mid	9
Post_2015_Kachemak Bay_Bishop's Beach_M_9	Halosaccion	0	During	2015	Kachemak Bay	Bishop's Beach	Mid	9
Post_2015_Kachemak Bay_Bishop's Beach_M_9	Mastocarpus / Mazaella	0	During	2015	Kachemak Bay	Bishop's Beach	Mid	9
Post_2015_Kachemak Bay_Bishop's Beach_M_9	Mytilus	0	During	2015	Kachemak Bay	Bishop's Beach	Mid	9
Post_2015_Kachemak Bay_Bishop's Beach_M_9	non-coralline algal crust	0	During	2015	Kachemak Bay	Bishop's Beach	Mid	9
Post_2015_Kachemak Bay_Bishop's Beach_M_9	Odonthalia / Neorhodomela	0	During	2015	Kachemak Bay	Bishop's Beach	Mid	9
Post_2015_Kachemak Bay_Bishop's Beach_M_9	Savoiea / Polysiphonia	0	During	2015	Kachemak Bay	Bishop's Beach	Mid	9
Post_2015_Kachemak Bay_Bishop's Beach_M_9	Ulva / Monostroma	0	During	2015	Kachemak Bay	Bishop's Beach	Mid	9
Post_2015_Kachemak Bay_Bishop's Beach_M_10	Acrosiphonia	0	During	2015	Kachemak Bay	Bishop's Beach	Mid	10
Post_2015_Kachemak Bay_Bishop's Beach_M_10	Alaria	0	During	2015	Kachemak Bay	Bishop's Beach	Mid	10
Post_2015_Kachemak Bay_Bishop's Beach_M_10	bare substrate	99	During	2015	Kachemak Bay	Bishop's Beach	Mid	10
Post_2015_Kachemak Bay_Bishop's Beach_M_10	barnacles	0	During	2015	Kachemak Bay	Bishop's Beach	Mid	10
Post_2015_Kachemak Bay_Bishop's Beach_M_10	Boreophyllum / Pyropia / Wildemania	0	During	2015	Kachemak Bay	Bishop's Beach	Mid	10
Post_2015_Kachemak Bay_Bishop's Beach_M_10	Cladophora / Chaetomorpha	0	During	2015	Kachemak Bay	Bishop's Beach	Mid	10
Post_2015_Kachemak Bay_Bishop's Beach_M_10	Cryptosiphonia	0	During	2015	Kachemak Bay	Bishop's Beach	Mid	10
Post_2015_Kachemak Bay_Bishop's Beach_M_10	Devaleraea / Palmaria	0	During	2015	Kachemak Bay	Bishop's Beach	Mid	10
Post_2015_Kachemak Bay_Bishop's Beach_M_10	encrusting coralline algae	0	During	2015	Kachemak Bay	Bishop's Beach	Mid	10
Post_2015_Kachemak Bay_Bishop's Beach_M_10	Fucus	0	During	2015	Kachemak Bay	Bishop's Beach	Mid	10
Post_2015_Kachemak Bay_Bishop's Beach_M_10	Gloiopeltis	0	During	2015	Kachemak Bay	Bishop's Beach	Mid	10
Post_2015_Kachemak Bay_Bishop's Beach_M_10	Halosaccion	0	During	2015	Kachemak Bay	Bishop's Beach	Mid	10
Post_2015_Kachemak Bay_Bishop's Beach_M_10	Mastocarpus / Mazaella	0	During	2015	Kachemak Bay	Bishop's Beach	Mid	10
Post_2015_Kachemak Bay_Bishop's Beach_M_10	Mytilus	0	During	2015	Kachemak Bay	Bishop's Beach	Mid	10
Post_2015_Kachemak Bay_Bishop's Beach_M_10	non-coralline algal crust	1	During	2015	Kachemak Bay	Bishop's Beach	Mid	10
Post_2015_Kachemak Bay_Bishop's Beach_M_10	Odonthalia / Neorhodomela	0	During	2015	Kachemak Bay	Bishop's Beach	Mid	10
Post_2015_Kachemak Bay_Bishop's Beach_M_10	Savoiea / Polysiphonia	0	During	2015	Kachemak Bay	Bishop's Beach	Mid	10
Post_2015_Kachemak Bay_Bishop's Beach_M_10	Ulva / Monostroma	0	During	2015	Kachemak Bay	Bishop's Beach	Mid	10
Post_2016_Kachemak Bay_Bishop's Beach_M_1	Acrosiphonia	5	During	2016	Kachemak Bay	Bishop's Beach	Mid	1
Post_2016_Kachemak Bay_Bishop's Beach_M_1	Alaria	0	During	2016	Kachemak Bay	Bishop's Beach	Mid	1
Post_2016_Kachemak Bay_Bishop's Beach_M_1	bare substrate	24	During	2016	Kachemak Bay	Bishop's Beach	Mid	1
Post_2016_Kachemak Bay_Bishop's Beach_M_1	barnacles	8	During	2016	Kachemak Bay	Bishop's Beach	Mid	1
Post_2016_Kachemak Bay_Bishop's Beach_M_1	Boreophyllum / Pyropia / Wildemania	2	During	2016	Kachemak Bay	Bishop's Beach	Mid	1
Post_2016_Kachemak Bay_Bishop's Beach_M_1	Cladophora / Chaetomorpha	0	During	2016	Kachemak Bay	Bishop's Beach	Mid	1
Post_2016_Kachemak Bay_Bishop's Beach_M_1	Cryptosiphonia	0	During	2016	Kachemak Bay	Bishop's Beach	Mid	1
Post_2016_Kachemak Bay_Bishop's Beach_M_1	Devaleraea / Palmaria	2	During	2016	Kachemak Bay	Bishop's Beach	Mid	1
Post_2016_Kachemak Bay_Bishop's Beach_M_1	encrusting coralline algae	0	During	2016	Kachemak Bay	Bishop's Beach	Mid	1
Post_2016_Kachemak Bay_Bishop's Beach_M_1	Fucus	40	During	2016	Kachemak Bay	Bishop's Beach	Mid	1
Post_2016_Kachemak Bay_Bishop's Beach_M_1	Gloiopeltis	0	During	2016	Kachemak Bay	Bishop's Beach	Mid	1
Post_2016_Kachemak Bay_Bishop's Beach_M_1	Halosaccion	0	During	2016	Kachemak Bay	Bishop's Beach	Mid	1
Post_2016_Kachemak Bay_Bishop's Beach_M_1	Mastocarpus / Mazaella	0	During	2016	Kachemak Bay	Bishop's Beach	Mid	1
Post_2016_Kachemak Bay_Bishop's Beach_M_1	Mytilus	0	During	2016	Kachemak Bay	Bishop's Beach	Mid	1
Post_2016_Kachemak Bay_Bishop's Beach_M_1	non-coralline algal crust	0	During	2016	Kachemak Bay	Bishop's Beach	Mid	1
Post_2016_Kachemak Bay_Bishop's Beach_M_1	Odonthalia / Neorhodomela	0	During	2016	Kachemak Bay	Bishop's Beach	Mid	1
Post_2016_Kachemak Bay_Bishop's Beach_M_1	Savoiea / Polysiphonia	15	During	2016	Kachemak Bay	Bishop's Beach	Mid	1
Post_2016_Kachemak Bay_Bishop's Beach_M_1	Ulva / Monostroma	4	During	2016	Kachemak Bay	Bishop's Beach	Mid	1
Post_2016_Kachemak Bay_Bishop's Beach_M_2	Acrosiphonia	0	During	2016	Kachemak Bay	Bishop's Beach	Mid	2
Post_2016_Kachemak Bay_Bishop's Beach_M_2	Alaria	0	During	2016	Kachemak Bay	Bishop's Beach	Mid	2
Post_2016_Kachemak Bay_Bishop's Beach_M_2	bare substrate	87	During	2016	Kachemak Bay	Bishop's Beach	Mid	2
Post_2016_Kachemak Bay_Bishop's Beach_M_2	barnacles	5	During	2016	Kachemak Bay	Bishop's Beach	Mid	2
Post_2016_Kachemak Bay_Bishop's Beach_M_2	Boreophyllum / Pyropia / Wildemania	2	During	2016	Kachemak Bay	Bishop's Beach	Mid	2
Post_2016_Kachemak Bay_Bishop's Beach_M_2	Cladophora / Chaetomorpha	0	During	2016	Kachemak Bay	Bishop's Beach	Mid	2
Post_2016_Kachemak Bay_Bishop's Beach_M_2	Cryptosiphonia	0	During	2016	Kachemak Bay	Bishop's Beach	Mid	2
Post_2016_Kachemak Bay_Bishop's Beach_M_2	Devaleraea / Palmaria	0	During	2016	Kachemak Bay	Bishop's Beach	Mid	2
Post_2016_Kachemak Bay_Bishop's Beach_M_2	encrusting coralline algae	0	During	2016	Kachemak Bay	Bishop's Beach	Mid	2
Post_2016_Kachemak Bay_Bishop's Beach_M_2	Fucus	4	During	2016	Kachemak Bay	Bishop's Beach	Mid	2
Post_2016_Kachemak Bay_Bishop's Beach_M_2	Gloiopeltis	0	During	2016	Kachemak Bay	Bishop's Beach	Mid	2
Post_2016_Kachemak Bay_Bishop's Beach_M_2	Halosaccion	0	During	2016	Kachemak Bay	Bishop's Beach	Mid	2
Post_2016_Kachemak Bay_Bishop's Beach_M_2	Mastocarpus / Mazaella	0	During	2016	Kachemak Bay	Bishop's Beach	Mid	2
Post_2016_Kachemak Bay_Bishop's Beach_M_2	Mytilus	0	During	2016	Kachemak Bay	Bishop's Beach	Mid	2
Post_2016_Kachemak Bay_Bishop's Beach_M_2	non-coralline algal crust	0	During	2016	Kachemak Bay	Bishop's Beach	Mid	2
Post_2016_Kachemak Bay_Bishop's Beach_M_2	Odonthalia / Neorhodomela	0	During	2016	Kachemak Bay	Bishop's Beach	Mid	2
Post_2016_Kachemak Bay_Bishop's Beach_M_2	Savoiea / Polysiphonia	0	During	2016	Kachemak Bay	Bishop's Beach	Mid	2
Post_2016_Kachemak Bay_Bishop's Beach_M_2	Ulva / Monostroma	2	During	2016	Kachemak Bay	Bishop's Beach	Mid	2
Post_2016_Kachemak Bay_Bishop's Beach_M_3	Acrosiphonia	8	During	2016	Kachemak Bay	Bishop's Beach	Mid	3
Post_2016_Kachemak Bay_Bishop's Beach_M_3	Alaria	0	During	2016	Kachemak Bay	Bishop's Beach	Mid	3
Post_2016_Kachemak Bay_Bishop's Beach_M_3	bare substrate	79	During	2016	Kachemak Bay	Bishop's Beach	Mid	3
Post_2016_Kachemak Bay_Bishop's Beach_M_3	barnacles	1	During	2016	Kachemak Bay	Bishop's Beach	Mid	3
Post_2016_Kachemak Bay_Bishop's Beach_M_3	Boreophyllum / Pyropia / Wildemania	7	During	2016	Kachemak Bay	Bishop's Beach	Mid	3
Post_2016_Kachemak Bay_Bishop's Beach_M_3	Cladophora / Chaetomorpha	0	During	2016	Kachemak Bay	Bishop's Beach	Mid	3
Post_2016_Kachemak Bay_Bishop's Beach_M_3	Cryptosiphonia	0	During	2016	Kachemak Bay	Bishop's Beach	Mid	3
Post_2016_Kachemak Bay_Bishop's Beach_M_3	Devaleraea / Palmaria	0	During	2016	Kachemak Bay	Bishop's Beach	Mid	3
Post_2016_Kachemak Bay_Bishop's Beach_M_3	encrusting coralline algae	0	During	2016	Kachemak Bay	Bishop's Beach	Mid	3
Post_2016_Kachemak Bay_Bishop's Beach_M_3	Fucus	0	During	2016	Kachemak Bay	Bishop's Beach	Mid	3
Post_2016_Kachemak Bay_Bishop's Beach_M_3	Gloiopeltis	0	During	2016	Kachemak Bay	Bishop's Beach	Mid	3
Post_2016_Kachemak Bay_Bishop's Beach_M_3	Halosaccion	0	During	2016	Kachemak Bay	Bishop's Beach	Mid	3
Post_2016_Kachemak Bay_Bishop's Beach_M_3	Mastocarpus / Mazaella	0	During	2016	Kachemak Bay	Bishop's Beach	Mid	3
Post_2016_Kachemak Bay_Bishop's Beach_M_3	Mytilus	0	During	2016	Kachemak Bay	Bishop's Beach	Mid	3
Post_2016_Kachemak Bay_Bishop's Beach_M_3	non-coralline algal crust	0	During	2016	Kachemak Bay	Bishop's Beach	Mid	3
Post_2016_Kachemak Bay_Bishop's Beach_M_3	Odonthalia / Neorhodomela	0	During	2016	Kachemak Bay	Bishop's Beach	Mid	3
Post_2016_Kachemak Bay_Bishop's Beach_M_3	Savoiea / Polysiphonia	0	During	2016	Kachemak Bay	Bishop's Beach	Mid	3
Post_2016_Kachemak Bay_Bishop's Beach_M_3	Ulva / Monostroma	5	During	2016	Kachemak Bay	Bishop's Beach	Mid	3
Post_2016_Kachemak Bay_Bishop's Beach_M_4	Acrosiphonia	0.990099	During	2016	Kachemak Bay	Bishop's Beach	Mid	4
Post_2016_Kachemak Bay_Bishop's Beach_M_4	Alaria	0	During	2016	Kachemak Bay	Bishop's Beach	Mid	4
Post_2016_Kachemak Bay_Bishop's Beach_M_4	bare substrate	96.0396	During	2016	Kachemak Bay	Bishop's Beach	Mid	4
Post_2016_Kachemak Bay_Bishop's Beach_M_4	barnacles	0	During	2016	Kachemak Bay	Bishop's Beach	Mid	4
Post_2016_Kachemak Bay_Bishop's Beach_M_4	Boreophyllum / Pyropia / Wildemania	0	During	2016	Kachemak Bay	Bishop's Beach	Mid	4
Post_2016_Kachemak Bay_Bishop's Beach_M_4	Cladophora / Chaetomorpha	0	During	2016	Kachemak Bay	Bishop's Beach	Mid	4
Post_2016_Kachemak Bay_Bishop's Beach_M_4	Cryptosiphonia	0	During	2016	Kachemak Bay	Bishop's Beach	Mid	4
Post_2016_Kachemak Bay_Bishop's Beach_M_4	Devaleraea / Palmaria	0	During	2016	Kachemak Bay	Bishop's Beach	Mid	4
Post_2016_Kachemak Bay_Bishop's Beach_M_4	encrusting coralline algae	0	During	2016	Kachemak Bay	Bishop's Beach	Mid	4
Post_2016_Kachemak Bay_Bishop's Beach_M_4	Fucus	0	During	2016	Kachemak Bay	Bishop's Beach	Mid	4
Post_2016_Kachemak Bay_Bishop's Beach_M_4	Gloiopeltis	0	During	2016	Kachemak Bay	Bishop's Beach	Mid	4
Post_2016_Kachemak Bay_Bishop's Beach_M_4	Halosaccion	0	During	2016	Kachemak Bay	Bishop's Beach	Mid	4
Post_2016_Kachemak Bay_Bishop's Beach_M_4	Mastocarpus / Mazaella	0	During	2016	Kachemak Bay	Bishop's Beach	Mid	4
Post_2016_Kachemak Bay_Bishop's Beach_M_4	Mytilus	0	During	2016	Kachemak Bay	Bishop's Beach	Mid	4
Post_2016_Kachemak Bay_Bishop's Beach_M_4	non-coralline algal crust	0.990099	During	2016	Kachemak Bay	Bishop's Beach	Mid	4
Post_2016_Kachemak Bay_Bishop's Beach_M_4	Odonthalia / Neorhodomela	0	During	2016	Kachemak Bay	Bishop's Beach	Mid	4
Post_2016_Kachemak Bay_Bishop's Beach_M_4	Savoiea / Polysiphonia	0.990099	During	2016	Kachemak Bay	Bishop's Beach	Mid	4
Post_2016_Kachemak Bay_Bishop's Beach_M_4	Ulva / Monostroma	0	During	2016	Kachemak Bay	Bishop's Beach	Mid	4
Post_2016_Kachemak Bay_Bishop's Beach_M_5	Acrosiphonia	2	During	2016	Kachemak Bay	Bishop's Beach	Mid	5
Post_2016_Kachemak Bay_Bishop's Beach_M_5	Alaria	0	During	2016	Kachemak Bay	Bishop's Beach	Mid	5
Post_2016_Kachemak Bay_Bishop's Beach_M_5	bare substrate	65	During	2016	Kachemak Bay	Bishop's Beach	Mid	5
Post_2016_Kachemak Bay_Bishop's Beach_M_5	barnacles	1	During	2016	Kachemak Bay	Bishop's Beach	Mid	5
Post_2016_Kachemak Bay_Bishop's Beach_M_5	Boreophyllum / Pyropia / Wildemania	1	During	2016	Kachemak Bay	Bishop's Beach	Mid	5
Post_2016_Kachemak Bay_Bishop's Beach_M_5	Cladophora / Chaetomorpha	0	During	2016	Kachemak Bay	Bishop's Beach	Mid	5
Post_2016_Kachemak Bay_Bishop's Beach_M_5	Cryptosiphonia	0	During	2016	Kachemak Bay	Bishop's Beach	Mid	5
Post_2016_Kachemak Bay_Bishop's Beach_M_5	Devaleraea / Palmaria	1	During	2016	Kachemak Bay	Bishop's Beach	Mid	5
Post_2016_Kachemak Bay_Bishop's Beach_M_5	encrusting coralline algae	0	During	2016	Kachemak Bay	Bishop's Beach	Mid	5
Post_2016_Kachemak Bay_Bishop's Beach_M_5	Fucus	25	During	2016	Kachemak Bay	Bishop's Beach	Mid	5
Post_2016_Kachemak Bay_Bishop's Beach_M_5	Gloiopeltis	0	During	2016	Kachemak Bay	Bishop's Beach	Mid	5
Post_2016_Kachemak Bay_Bishop's Beach_M_5	Halosaccion	0	During	2016	Kachemak Bay	Bishop's Beach	Mid	5
Post_2016_Kachemak Bay_Bishop's Beach_M_5	Mastocarpus / Mazaella	0	During	2016	Kachemak Bay	Bishop's Beach	Mid	5
Post_2016_Kachemak Bay_Bishop's Beach_M_5	Mytilus	0	During	2016	Kachemak Bay	Bishop's Beach	Mid	5
Post_2016_Kachemak Bay_Bishop's Beach_M_5	non-coralline algal crust	0	During	2016	Kachemak Bay	Bishop's Beach	Mid	5
Post_2016_Kachemak Bay_Bishop's Beach_M_5	Odonthalia / Neorhodomela	0	During	2016	Kachemak Bay	Bishop's Beach	Mid	5
Post_2016_Kachemak Bay_Bishop's Beach_M_5	Savoiea / Polysiphonia	5	During	2016	Kachemak Bay	Bishop's Beach	Mid	5
Post_2016_Kachemak Bay_Bishop's Beach_M_5	Ulva / Monostroma	0	During	2016	Kachemak Bay	Bishop's Beach	Mid	5
Post_2016_Kachemak Bay_Bishop's Beach_M_6	Acrosiphonia	2	During	2016	Kachemak Bay	Bishop's Beach	Mid	6
Post_2016_Kachemak Bay_Bishop's Beach_M_6	Alaria	0	During	2016	Kachemak Bay	Bishop's Beach	Mid	6
Post_2016_Kachemak Bay_Bishop's Beach_M_6	bare substrate	67	During	2016	Kachemak Bay	Bishop's Beach	Mid	6
Post_2016_Kachemak Bay_Bishop's Beach_M_6	barnacles	5	During	2016	Kachemak Bay	Bishop's Beach	Mid	6
Post_2016_Kachemak Bay_Bishop's Beach_M_6	Boreophyllum / Pyropia / Wildemania	1	During	2016	Kachemak Bay	Bishop's Beach	Mid	6
Post_2016_Kachemak Bay_Bishop's Beach_M_6	Cladophora / Chaetomorpha	0	During	2016	Kachemak Bay	Bishop's Beach	Mid	6
Post_2016_Kachemak Bay_Bishop's Beach_M_6	Cryptosiphonia	0	During	2016	Kachemak Bay	Bishop's Beach	Mid	6
Post_2016_Kachemak Bay_Bishop's Beach_M_6	Devaleraea / Palmaria	0	During	2016	Kachemak Bay	Bishop's Beach	Mid	6
Post_2016_Kachemak Bay_Bishop's Beach_M_6	encrusting coralline algae	0	During	2016	Kachemak Bay	Bishop's Beach	Mid	6
Post_2016_Kachemak Bay_Bishop's Beach_M_6	Fucus	21	During	2016	Kachemak Bay	Bishop's Beach	Mid	6
Post_2016_Kachemak Bay_Bishop's Beach_M_6	Gloiopeltis	0	During	2016	Kachemak Bay	Bishop's Beach	Mid	6
Post_2016_Kachemak Bay_Bishop's Beach_M_6	Halosaccion	0	During	2016	Kachemak Bay	Bishop's Beach	Mid	6
Post_2016_Kachemak Bay_Bishop's Beach_M_6	Mastocarpus / Mazaella	0	During	2016	Kachemak Bay	Bishop's Beach	Mid	6
Post_2016_Kachemak Bay_Bishop's Beach_M_6	Mytilus	0	During	2016	Kachemak Bay	Bishop's Beach	Mid	6
Post_2016_Kachemak Bay_Bishop's Beach_M_6	non-coralline algal crust	0	During	2016	Kachemak Bay	Bishop's Beach	Mid	6
Post_2016_Kachemak Bay_Bishop's Beach_M_6	Odonthalia / Neorhodomela	0	During	2016	Kachemak Bay	Bishop's Beach	Mid	6
Post_2016_Kachemak Bay_Bishop's Beach_M_6	Savoiea / Polysiphonia	2	During	2016	Kachemak Bay	Bishop's Beach	Mid	6
Post_2016_Kachemak Bay_Bishop's Beach_M_6	Ulva / Monostroma	2	During	2016	Kachemak Bay	Bishop's Beach	Mid	6
Post_2016_Kachemak Bay_Bishop's Beach_M_7	Acrosiphonia	0	During	2016	Kachemak Bay	Bishop's Beach	Mid	7
Post_2016_Kachemak Bay_Bishop's Beach_M_7	Alaria	0	During	2016	Kachemak Bay	Bishop's Beach	Mid	7
Post_2016_Kachemak Bay_Bishop's Beach_M_7	bare substrate	100	During	2016	Kachemak Bay	Bishop's Beach	Mid	7
Post_2016_Kachemak Bay_Bishop's Beach_M_7	barnacles	0	During	2016	Kachemak Bay	Bishop's Beach	Mid	7
Post_2016_Kachemak Bay_Bishop's Beach_M_7	Boreophyllum / Pyropia / Wildemania	0	During	2016	Kachemak Bay	Bishop's Beach	Mid	7
Post_2016_Kachemak Bay_Bishop's Beach_M_7	Cladophora / Chaetomorpha	0	During	2016	Kachemak Bay	Bishop's Beach	Mid	7
Post_2016_Kachemak Bay_Bishop's Beach_M_7	Cryptosiphonia	0	During	2016	Kachemak Bay	Bishop's Beach	Mid	7
Post_2016_Kachemak Bay_Bishop's Beach_M_7	Devaleraea / Palmaria	0	During	2016	Kachemak Bay	Bishop's Beach	Mid	7
Post_2016_Kachemak Bay_Bishop's Beach_M_7	encrusting coralline algae	0	During	2016	Kachemak Bay	Bishop's Beach	Mid	7
Post_2016_Kachemak Bay_Bishop's Beach_M_7	Fucus	0	During	2016	Kachemak Bay	Bishop's Beach	Mid	7
Post_2016_Kachemak Bay_Bishop's Beach_M_7	Gloiopeltis	0	During	2016	Kachemak Bay	Bishop's Beach	Mid	7
Post_2016_Kachemak Bay_Bishop's Beach_M_7	Halosaccion	0	During	2016	Kachemak Bay	Bishop's Beach	Mid	7
Post_2016_Kachemak Bay_Bishop's Beach_M_7	Mastocarpus / Mazaella	0	During	2016	Kachemak Bay	Bishop's Beach	Mid	7
Post_2016_Kachemak Bay_Bishop's Beach_M_7	Mytilus	0	During	2016	Kachemak Bay	Bishop's Beach	Mid	7
Post_2016_Kachemak Bay_Bishop's Beach_M_7	non-coralline algal crust	0	During	2016	Kachemak Bay	Bishop's Beach	Mid	7
Post_2016_Kachemak Bay_Bishop's Beach_M_7	Odonthalia / Neorhodomela	0	During	2016	Kachemak Bay	Bishop's Beach	Mid	7
Post_2016_Kachemak Bay_Bishop's Beach_M_7	Savoiea / Polysiphonia	0	During	2016	Kachemak Bay	Bishop's Beach	Mid	7
Post_2016_Kachemak Bay_Bishop's Beach_M_7	Ulva / Monostroma	0	During	2016	Kachemak Bay	Bishop's Beach	Mid	7
Post_2016_Kachemak Bay_Bishop's Beach_M_8	Acrosiphonia	0	During	2016	Kachemak Bay	Bishop's Beach	Mid	8
Post_2016_Kachemak Bay_Bishop's Beach_M_8	Alaria	0	During	2016	Kachemak Bay	Bishop's Beach	Mid	8
Post_2016_Kachemak Bay_Bishop's Beach_M_8	bare substrate	100	During	2016	Kachemak Bay	Bishop's Beach	Mid	8
Post_2016_Kachemak Bay_Bishop's Beach_M_8	barnacles	0	During	2016	Kachemak Bay	Bishop's Beach	Mid	8
Post_2016_Kachemak Bay_Bishop's Beach_M_8	Boreophyllum / Pyropia / Wildemania	0	During	2016	Kachemak Bay	Bishop's Beach	Mid	8
Post_2016_Kachemak Bay_Bishop's Beach_M_8	Cladophora / Chaetomorpha	0	During	2016	Kachemak Bay	Bishop's Beach	Mid	8
Post_2016_Kachemak Bay_Bishop's Beach_M_8	Cryptosiphonia	0	During	2016	Kachemak Bay	Bishop's Beach	Mid	8
Post_2016_Kachemak Bay_Bishop's Beach_M_8	Devaleraea / Palmaria	0	During	2016	Kachemak Bay	Bishop's Beach	Mid	8
Post_2016_Kachemak Bay_Bishop's Beach_M_8	encrusting coralline algae	0	During	2016	Kachemak Bay	Bishop's Beach	Mid	8
Post_2016_Kachemak Bay_Bishop's Beach_M_8	Fucus	0	During	2016	Kachemak Bay	Bishop's Beach	Mid	8
Post_2016_Kachemak Bay_Bishop's Beach_M_8	Gloiopeltis	0	During	2016	Kachemak Bay	Bishop's Beach	Mid	8
Post_2016_Kachemak Bay_Bishop's Beach_M_8	Halosaccion	0	During	2016	Kachemak Bay	Bishop's Beach	Mid	8
Post_2016_Kachemak Bay_Bishop's Beach_M_8	Mastocarpus / Mazaella	0	During	2016	Kachemak Bay	Bishop's Beach	Mid	8
Post_2016_Kachemak Bay_Bishop's Beach_M_8	Mytilus	0	During	2016	Kachemak Bay	Bishop's Beach	Mid	8
Post_2016_Kachemak Bay_Bishop's Beach_M_8	non-coralline algal crust	0	During	2016	Kachemak Bay	Bishop's Beach	Mid	8
Post_2016_Kachemak Bay_Bishop's Beach_M_8	Odonthalia / Neorhodomela	0	During	2016	Kachemak Bay	Bishop's Beach	Mid	8
Post_2016_Kachemak Bay_Bishop's Beach_M_8	Savoiea / Polysiphonia	0	During	2016	Kachemak Bay	Bishop's Beach	Mid	8
Post_2016_Kachemak Bay_Bishop's Beach_M_8	Ulva / Monostroma	0	During	2016	Kachemak Bay	Bishop's Beach	Mid	8
Post_2016_Kachemak Bay_Bishop's Beach_M_9	Acrosiphonia	0	During	2016	Kachemak Bay	Bishop's Beach	Mid	9
Post_2016_Kachemak Bay_Bishop's Beach_M_9	Alaria	0	During	2016	Kachemak Bay	Bishop's Beach	Mid	9
Post_2016_Kachemak Bay_Bishop's Beach_M_9	bare substrate	80	During	2016	Kachemak Bay	Bishop's Beach	Mid	9
Post_2016_Kachemak Bay_Bishop's Beach_M_9	barnacles	10	During	2016	Kachemak Bay	Bishop's Beach	Mid	9
Post_2016_Kachemak Bay_Bishop's Beach_M_9	Boreophyllum / Pyropia / Wildemania	3	During	2016	Kachemak Bay	Bishop's Beach	Mid	9
Post_2016_Kachemak Bay_Bishop's Beach_M_9	Cladophora / Chaetomorpha	0	During	2016	Kachemak Bay	Bishop's Beach	Mid	9
Post_2016_Kachemak Bay_Bishop's Beach_M_9	Cryptosiphonia	0	During	2016	Kachemak Bay	Bishop's Beach	Mid	9
Post_2016_Kachemak Bay_Bishop's Beach_M_9	Devaleraea / Palmaria	0	During	2016	Kachemak Bay	Bishop's Beach	Mid	9
Post_2016_Kachemak Bay_Bishop's Beach_M_9	encrusting coralline algae	0	During	2016	Kachemak Bay	Bishop's Beach	Mid	9
Post_2016_Kachemak Bay_Bishop's Beach_M_9	Fucus	5	During	2016	Kachemak Bay	Bishop's Beach	Mid	9
Post_2016_Kachemak Bay_Bishop's Beach_M_9	Gloiopeltis	0	During	2016	Kachemak Bay	Bishop's Beach	Mid	9
Post_2016_Kachemak Bay_Bishop's Beach_M_9	Halosaccion	0	During	2016	Kachemak Bay	Bishop's Beach	Mid	9
Post_2016_Kachemak Bay_Bishop's Beach_M_9	Mastocarpus / Mazaella	0	During	2016	Kachemak Bay	Bishop's Beach	Mid	9
Post_2016_Kachemak Bay_Bishop's Beach_M_9	Mytilus	1	During	2016	Kachemak Bay	Bishop's Beach	Mid	9
Post_2016_Kachemak Bay_Bishop's Beach_M_9	non-coralline algal crust	0	During	2016	Kachemak Bay	Bishop's Beach	Mid	9
Post_2016_Kachemak Bay_Bishop's Beach_M_9	Odonthalia / Neorhodomela	0	During	2016	Kachemak Bay	Bishop's Beach	Mid	9
Post_2016_Kachemak Bay_Bishop's Beach_M_9	Savoiea / Polysiphonia	0	During	2016	Kachemak Bay	Bishop's Beach	Mid	9
Post_2016_Kachemak Bay_Bishop's Beach_M_9	Ulva / Monostroma	1	During	2016	Kachemak Bay	Bishop's Beach	Mid	9
Post_2016_Kachemak Bay_Bishop's Beach_M_10	Acrosiphonia	1	During	2016	Kachemak Bay	Bishop's Beach	Mid	10
Post_2016_Kachemak Bay_Bishop's Beach_M_10	Alaria	0	During	2016	Kachemak Bay	Bishop's Beach	Mid	10
Post_2016_Kachemak Bay_Bishop's Beach_M_10	bare substrate	86	During	2016	Kachemak Bay	Bishop's Beach	Mid	10
Post_2016_Kachemak Bay_Bishop's Beach_M_10	barnacles	9	During	2016	Kachemak Bay	Bishop's Beach	Mid	10
Post_2016_Kachemak Bay_Bishop's Beach_M_10	Boreophyllum / Pyropia / Wildemania	2	During	2016	Kachemak Bay	Bishop's Beach	Mid	10
Post_2016_Kachemak Bay_Bishop's Beach_M_10	Cladophora / Chaetomorpha	0	During	2016	Kachemak Bay	Bishop's Beach	Mid	10
Post_2016_Kachemak Bay_Bishop's Beach_M_10	Cryptosiphonia	0	During	2016	Kachemak Bay	Bishop's Beach	Mid	10
Post_2016_Kachemak Bay_Bishop's Beach_M_10	Devaleraea / Palmaria	0	During	2016	Kachemak Bay	Bishop's Beach	Mid	10
Post_2016_Kachemak Bay_Bishop's Beach_M_10	encrusting coralline algae	0	During	2016	Kachemak Bay	Bishop's Beach	Mid	10
Post_2016_Kachemak Bay_Bishop's Beach_M_10	Fucus	1	During	2016	Kachemak Bay	Bishop's Beach	Mid	10
Post_2016_Kachemak Bay_Bishop's Beach_M_10	Gloiopeltis	0	During	2016	Kachemak Bay	Bishop's Beach	Mid	10
Post_2016_Kachemak Bay_Bishop's Beach_M_10	Halosaccion	0	During	2016	Kachemak Bay	Bishop's Beach	Mid	10
Post_2016_Kachemak Bay_Bishop's Beach_M_10	Mastocarpus / Mazaella	0	During	2016	Kachemak Bay	Bishop's Beach	Mid	10
Post_2016_Kachemak Bay_Bishop's Beach_M_10	Mytilus	0	During	2016	Kachemak Bay	Bishop's Beach	Mid	10
Post_2016_Kachemak Bay_Bishop's Beach_M_10	non-coralline algal crust	0	During	2016	Kachemak Bay	Bishop's Beach	Mid	10
Post_2016_Kachemak Bay_Bishop's Beach_M_10	Odonthalia / Neorhodomela	0	During	2016	Kachemak Bay	Bishop's Beach	Mid	10
Post_2016_Kachemak Bay_Bishop's Beach_M_10	Savoiea / Polysiphonia	0	During	2016	Kachemak Bay	Bishop's Beach	Mid	10
Post_2016_Kachemak Bay_Bishop's Beach_M_10	Ulva / Monostroma	1	During	2016	Kachemak Bay	Bishop's Beach	Mid	10
Post_2017_Kachemak Bay_Bishop's Beach_M_1	Acrosiphonia	1	During	2017	Kachemak Bay	Bishop's Beach	Mid	1
Post_2017_Kachemak Bay_Bishop's Beach_M_1	Alaria	0	During	2017	Kachemak Bay	Bishop's Beach	Mid	1
Post_2017_Kachemak Bay_Bishop's Beach_M_1	bare substrate	41	During	2017	Kachemak Bay	Bishop's Beach	Mid	1
Post_2017_Kachemak Bay_Bishop's Beach_M_1	barnacles	3	During	2017	Kachemak Bay	Bishop's Beach	Mid	1
Post_2017_Kachemak Bay_Bishop's Beach_M_1	Boreophyllum / Pyropia / Wildemania	0	During	2017	Kachemak Bay	Bishop's Beach	Mid	1
Post_2017_Kachemak Bay_Bishop's Beach_M_1	Cladophora / Chaetomorpha	0	During	2017	Kachemak Bay	Bishop's Beach	Mid	1
Post_2017_Kachemak Bay_Bishop's Beach_M_1	Cryptosiphonia	5	During	2017	Kachemak Bay	Bishop's Beach	Mid	1
Post_2017_Kachemak Bay_Bishop's Beach_M_1	Devaleraea / Palmaria	8	During	2017	Kachemak Bay	Bishop's Beach	Mid	1
Post_2017_Kachemak Bay_Bishop's Beach_M_1	encrusting coralline algae	0	During	2017	Kachemak Bay	Bishop's Beach	Mid	1
Post_2017_Kachemak Bay_Bishop's Beach_M_1	Fucus	15	During	2017	Kachemak Bay	Bishop's Beach	Mid	1
Post_2017_Kachemak Bay_Bishop's Beach_M_1	Gloiopeltis	0	During	2017	Kachemak Bay	Bishop's Beach	Mid	1
Post_2017_Kachemak Bay_Bishop's Beach_M_1	Halosaccion	0	During	2017	Kachemak Bay	Bishop's Beach	Mid	1
Post_2017_Kachemak Bay_Bishop's Beach_M_1	Mastocarpus / Mazaella	5	During	2017	Kachemak Bay	Bishop's Beach	Mid	1
Post_2017_Kachemak Bay_Bishop's Beach_M_1	Mytilus	0	During	2017	Kachemak Bay	Bishop's Beach	Mid	1
Post_2017_Kachemak Bay_Bishop's Beach_M_1	non-coralline algal crust	0	During	2017	Kachemak Bay	Bishop's Beach	Mid	1
Post_2017_Kachemak Bay_Bishop's Beach_M_1	Odonthalia / Neorhodomela	0	During	2017	Kachemak Bay	Bishop's Beach	Mid	1
Post_2017_Kachemak Bay_Bishop's Beach_M_1	Savoiea / Polysiphonia	0	During	2017	Kachemak Bay	Bishop's Beach	Mid	1
Post_2017_Kachemak Bay_Bishop's Beach_M_1	Ulva / Monostroma	7	During	2017	Kachemak Bay	Bishop's Beach	Mid	1
Post_2017_Kachemak Bay_Bishop's Beach_M_2	Acrosiphonia	0	During	2017	Kachemak Bay	Bishop's Beach	Mid	2
[truncated: 65,843 more rows]
